# Supplementary material for: Transcriptome and Gene Editing Analyses Reveal MOF1a Defect Alters the Expression of Genes Associated with Tapetum Development and Chromosome Behavior at Meiosis Stage Resulting in Low Pollen Fertility of Tetraploid Rice
Source: Int J Mol Sci. 2020 Oct 11;21(20):7489. doi: 10.3390/ijms21207489 (PMC7589589; doi:10.3390/ijms21207489)
Supplement: Supplementary file 1 [file ijms-21-07489-s001.zip › Lu-P1-Supplementary+file+2+2020-08-14(1).xlsx]

## Sheet: Table S1
Table S1 Average RNA-seq data quality among three biological replicates in H1, HF and LF
Samples	Clean reads	Coverage (%)
H1	49260231	94.42
LF	51751476	95.39
HF	58789337	93.81
LF, HF and H1 indicate low pollen fertility recombinant inbred line, high fertility recombinant inbred line and neo-tetraploid rice, respectively

## Sheet: Table S2
Table S2 Differentially expressed genes (DEGs) between H1 and LF
gene_id	regulation	GeneName
LOC_Os01g02950	down
LOC_Os01g25720	up
LOC_Os01g32120	up
LOC_Os01g36820	down
LOC_Os01g39590	up
LOC_Os01g45430	down
LOC_Os01g60800	up
LOC_Os01g65690	down
LOC_Os02g02010	up
LOC_Os02g07700	down
LOC_Os02g20060	down
LOC_Os02g51910	down
LOC_Os03g06690	down
LOC_Os03g07540	up	OsbHLH153
LOC_Os03g12180	down
LOC_Os03g12260	up
LOC_Os03g25240	down
LOC_Os03g37120	up
LOC_Os03g44920	down
LOC_Os03g46140	down
LOC_Os03g51556	down
LOC_Os04g20490	down
LOC_Os04g42020	down
LOC_Os05g16750	down
LOC_Os05g40020	up
LOC_Os05g51360	down	OsEBS
LOC_Os06g04150	up	YGL18
LOC_Os06g16610	down
LOC_Os06g20820	down
LOC_Os06g35574	down
LOC_Os07g34880	up
LOC_Os07g46950	up
LOC_Os07g48870	down
LOC_Os08g06390	up
LOC_Os08g13000	up
LOC_Os08g15288	down
LOC_Os08g35580	up
LOC_Os08g41650	down
LOC_Os09g25720	down
LOC_Os10g21266	down
LOC_Os10g21300	down
LOC_Os10g33190	down
LOC_Os11g05770	up
LOC_Os11g24550	up
LOC_Os11g41940	down
LOC_Os11g42170	down
LOC_Os12g05180	down
LOC_Os12g07760	up
LOC_Os12g08480	down
LOC_Os12g33289	down
LOC_Os12g35890	up
LOC_Os12g36070	down
LOC_Os12g43780	down
LOC_Os02g01540	down
LOC_Os02g02310	up
LOC_Os02g02470	up
LOC_Os02g02780	up	OsACTPK1
LOC_Os02g02840	down	OsRacB
LOC_Os02g02820	up	TDR
LOC_Os02g02820	up	TDR
LOC_Os02g03970	down
LOC_Os02g04060	down
LOC_Os02g04725	down
LOC_Os02g04950	down
LOC_Os02g04960	down
LOC_Os02g05199	down
LOC_Os02g05840	down	LC2|OsVIL3
LOC_Os02g05950	down
LOC_Os02g06190	down
LOC_Os02g06010	down
LOC_Os02g06030	down
LOC_Os01g16210	up
LOC_Os01g16220	up
LOC_Os02g06754	down
LOC_Os02g06760	down
LOC_Os02g06770	down
LOC_Os02g06790	down
LOC_Os02g07160	down
LOC_Os02g07260	up	OsPgk2
LOC_Os02g07720	up
LOC_Os02g08100	down	Os4CL3
LOC_Os02g08110	down
LOC_Os02g08160	down
LOC_Os02g08220	up
LOC_Os01g02420	up
LOC_Os02g08310	up
LOC_Os02g08330	up
LOC_Os02g08520	up
LOC_Os02g08440	up	OsWRKY71
LOC_Os02g09460	down
LOC_Os02g09780	up
LOC_Os02g09790	up
LOC_Os02g10170	up
LOC_Os02g10520	down
LOC_Os02g12350	up
LOC_Os02g12340	up
LOC_Os02g12380	up
LOC_Os02g13300	down
LOC_Os02g11110	up
LOC_Os02g11640	down
LOC_Os02g11740	down
LOC_Os02g14059	down
LOC_Os02g14160	up
LOC_Os02g14800	up
LOC_Os02g14800	up
LOC_Os02g15160	up
LOC_Os02g15960	down
LOC_Os02g17500	up	OsGMST1
LOC_Os02g17620	down
LOC_Os02g18390	up
LOC_Os02g18750	up
LOC_Os02g18780	down
LOC_Os02g18880	up
LOC_Os01g17320	down
LOC_Os02g21580	down
LOC_Os02g22750	up
LOC_Os02g24100	down
LOC_Os02g24210	down
LOC_Os01g18230	down
LOC_Os02g25020	down
LOC_Os02g26290	down
LOC_Os01g18320	down
LOC_Os01g02570	up
LOC_Os02g29590	up
LOC_Os02g29890	up
LOC_Os02g30050	up
LOC_Os02g30114	down
LOC_Os02g30630	up	OsALS
LOC_Os01g18850	up
LOC_Os02g30940	down
LOC_Os02g31030	down	OsGDPD2
LOC_Os02g31140	down	CFL1
LOC_Os02g31850	down
LOC_Os02g33580	down
LOC_Os02g33680	down
LOC_Os02g34220	down
LOC_Os02g34970	down
LOC_Os02g35190	down	OsCLC-2
LOC_Os02g35220	up
LOC_Os02g35220	down
LOC_Os01g19400	up
LOC_Os02g35840	down
LOC_Os02g35860	down
LOC_Os02g36350	down
LOC_Os02g36690	down
LOC_Os02g37020	down
LOC_Os02g37080	up
LOC_Os01g19490	down
LOC_Os02g37862	down
LOC_Os02g38040	up
LOC_Os02g38080	up
LOC_Os02g38300	down
LOC_Os02g38470	up
LOC_Os02g38420	up
LOC_Os02g38430	up
LOC_Os02g38860	down
LOC_Os02g38890	down
LOC_Os02g39384	up
LOC_Os02g39490	down
LOC_Os02g39510	down
LOC_Os02g38790	down
LOC_Os02g39640	up
LOC_Os02g39650	up
LOC_Os02g40010	down
LOC_Os02g40120	up
LOC_Os02g40320	down
LOC_Os02g40280	down
LOC_Os02g40340	down
LOC_Os02g40400	down
LOC_Os02g40514	up
LOC_Os02g40530	down	OsMPS
LOC_Os02g40800	up
LOC_Os02g41450	down
LOC_Os01g19990	up
LOC_Os02g41830	down
LOC_Os02g42520	down
LOC_Os02g42530	down
LOC_Os02g43230	down
LOC_Os02g43770	down
LOC_Os02g44010	down
LOC_Os02g44220	up
LOC_Os02g44530	down
LOC_Os02g44990	down	MAIF1
LOC_Os02g45310	down
LOC_Os02g46100	up
LOC_Os02g46600	down
LOC_Os01g21180	down
LOC_Os02g47130	up
LOC_Os02g47150	down
LOC_Os02g48150	down
LOC_Os02g48620	up
LOC_Os02g48870	down
LOC_Os01g02760	down
LOC_Os01g02770	down
LOC_Os02g49420	up
LOC_Os02g49610	down
LOC_Os02g49850	down
LOC_Os01g21620	down
LOC_Os02g50210	up
LOC_Os02g50220	up
LOC_Os02g50280	down
LOC_Os02g50480	down	OsCKT1|OHK5|OsHk6
LOC_Os01g21630	down
LOC_Os02g50630	up
LOC_Os02g50700	down
LOC_Os02g50690	down
LOC_Os02g51060	down
LOC_Os02g51460	up
LOC_Os02g51610	down
LOC_Os02g51620	down
LOC_Os02g51920	down
LOC_Os02g52430	down
LOC_Os02g53490	up	MTP8.2
LOC_Os02g54690	down
LOC_Os02g55190	down
LOC_Os02g55430	up
LOC_Os02g55400	up
LOC_Os02g55440	down
LOC_Os02g55870	down
LOC_Os02g55890	down	OVP3
LOC_Os02g55670	up
LOC_Os02g55720	up
LOC_Os02g55770	up
LOC_Os02g55710	up
LOC_Os02g56000	up
LOC_Os02g56100	up	RNRL2
LOC_Os01g22540	up
LOC_Os02g56600	down
LOC_Os02g57330	down
LOC_Os02g57360	down
LOC_Os02g57800	up
LOC_Os02g58180	down
LOC_Os03g01120	up	OsA8
LOC_Os03g01130	up
LOC_Os03g01365	down
LOC_Os03g01960	down
LOC_Os01g23740	up
LOC_Os03g02170	up
LOC_Os03g02700	down
LOC_Os01g23850	down
LOC_Os01g23910	down
LOC_Os03g04020	down	EXPLA1
LOC_Os03g04140	down
LOC_Os03g04450	up
LOC_Os01g24120	down
LOC_Os01g24160	down
LOC_Os03g04830	up
LOC_Os03g05300	up
LOC_Os03g05334	down	OsIPS1
LOC_Os03g05910	up
LOC_Os03g05820	up
LOC_Os03g06700	up
LOC_Os03g06705	up
LOC_Os03g06960	up
LOC_Os03g07200	down
LOC_Os03g09150	up
LOC_Os03g10540	down
LOC_Os03g10550	down
LOC_Os03g10590	up
LOC_Os03g10950	down
LOC_Os01g25560	down
LOC_Os03g11810	down
LOC_Os03g11970	down
LOC_Os03g11980	down
LOC_Os03g12290	down	GLN1;2|GS1;2|OsGS1;2
LOC_Os03g12470	down	OsWAK25
LOC_Os03g12670	up
LOC_Os03g12710	up
LOC_Os03g12810	up
LOC_Os03g12890	down
LOC_Os03g13010	up	TUD1|DSG1|ELF1
LOC_Os03g13040	up
LOC_Os03g13100	up
LOC_Os03g13720	up
LOC_Os03g13750	down
LOC_Os03g13810	up	OsPE
LOC_Os03g14090	up
LOC_Os03g14140	up
LOC_Os03g14170	up
LOC_Os03g14254	up
LOC_Os03g14520	down
LOC_Os03g14530	down
LOC_Os03g14710	down
LOC_Os03g14690	up
LOC_Os03g14700	down
LOC_Os03g15380	up
LOC_Os03g15740	down
LOC_Os03g16000	up
LOC_Os03g16090	down
LOC_Os03g16690	up
LOC_Os03g16718	up
LOC_Os03g16800	up
LOC_Os03g16860	down
LOC_Os03g16874	up
LOC_Os03g17470	up	OsGSTL2
LOC_Os03g17590	down
LOC_Os03g17660	up
LOC_Os03g17960	up
LOC_Os03g18120	down
LOC_Os01g27340	down
LOC_Os03g18600	down
LOC_Os03g18680	down
LOC_Os03g18820	up	OsXXT1
LOC_Os03g18870	down
LOC_Os03g18850	down	JIOsPR10|OsPR10
LOC_Os03g18890	down
LOC_Os01g27700	down
LOC_Os03g19500	up
LOC_Os03g20120	up	OsGolS1
LOC_Os03g20170	down
LOC_Os03g20500	up
LOC_Os03g20700	down	OsCHLH
LOC_Os03g20870	down
LOC_Os03g21250	up
LOC_Os03g21914	down
LOC_Os03g21960	up
LOC_Os03g22250	up
LOC_Os03g22320	up
LOC_Os01g28690	up	APIP12
LOC_Os03g22430	up
LOC_Os03g22670	down
LOC_Os03g22990	up
LOC_Os03g23940	down
LOC_Os03g23950	up
LOC_Os03g24200	down
LOC_Os03g24880	down
LOC_Os03g25120	up
LOC_Os03g25270	down
LOC_Os03g25300	down
LOC_Os03g25760	down
LOC_Os03g26200	up
LOC_Os03g26120	down
LOC_Os03g26500	down
LOC_Os03g27030	down
LOC_Os03g27340	down
LOC_Os03g27390	down	OsbHLH138
LOC_Os03g27830	down
LOC_Os03g27830	down
LOC_Os03g28100	down
LOC_Os03g28120	down
LOC_Os03g28175	up
LOC_Os03g28250	down
LOC_Os03g28400	up
LOC_Os03g29460	up
LOC_Os03g30150	down
LOC_Os03g30300	down
LOC_Os03g30590	up
LOC_Os03g30840	down
LOC_Os01g29780	up
LOC_Os03g31760	down
LOC_Os03g31944	up
LOC_Os03g32330	down
LOC_Os03g32499	up
LOC_Os03g32560	up
LOC_Os03g35950	down
LOC_Os03g35950	down
LOC_Os03g36080	down
LOC_Os03g36110	down
LOC_Os03g36760	down
LOC_Os03g38020	down
LOC_Os03g38150	down
LOC_Os03g38790	down
LOC_Os03g39040	down
LOC_Os03g39230	up
LOC_Os03g39890	down
LOC_Os03g40020	up	YSA
LOC_Os03g40060	up
LOC_Os03g40170	down
LOC_Os03g40180	down
LOC_Os03g40700	up
LOC_Os03g40800	up
LOC_Os03g41080	up
LOC_Os03g42230	down
LOC_Os03g42440	down
LOC_Os03g44180	down
LOC_Os03g44450	down
LOC_Os03g45110	up
LOC_Os03g45720	down
LOC_Os03g46180	up
LOC_Os03g46390	down
LOC_Os03g46660	down
LOC_Os03g46770	up
LOC_Os03g47610	up
LOC_Os03g47670	up
LOC_Os03g48160	down
LOC_Os03g48170	up	FLO6
LOC_Os03g48626	down
LOC_Os03g49170	down
LOC_Os03g50160	down
LOC_Os03g50560	down	PIBP1
LOC_Os03g50800	down
LOC_Os03g50810	up	OsTMK
LOC_Os03g51710	down	OSH3
LOC_Os03g51970	down	OsGRF6
LOC_Os03g52130	down
LOC_Os03g52320	down	MKB3
LOC_Os03g53070	down
LOC_Os03g53450	up
LOC_Os03g53520	up
LOC_Os03g54000	down	OPT|OsOPT7
LOC_Os01g33684	down
LOC_Os01g33710	down
LOC_Os03g55660	up
LOC_Os03g55670	up
LOC_Os03g55720	down
LOC_Os01g33760	down
LOC_Os03g56100	up
LOC_Os03g56080	up
LOC_Os03g56090	down
LOC_Os03g56110	down	OSH43
LOC_Os03g56490	down
LOC_Os03g56590	up
LOC_Os03g56790	up	OsADF2
LOC_Os03g56720	down
LOC_Os03g56760	down
LOC_Os03g57200	down
LOC_Os03g57160	down
LOC_Os03g57640	up
LOC_Os03g57690	down
LOC_Os03g58160	up	OsHsfA2e
LOC_Os03g58540	down	TSV3
LOC_Os03g58800	down
LOC_Os01g34390	down
LOC_Os03g59380	down
LOC_Os03g59880	down
LOC_Os03g60020	up
LOC_Os03g60690	up
LOC_Os03g61150	down
LOC_Os03g61220	up
LOC_Os03g61220	up
LOC_Os01g04160	down
LOC_Os03g61670	down	CRT
LOC_Os03g61930	up	OsACBP6
LOC_Os03g62370	down
LOC_Os03g62530	down
LOC_Os03g62620	down
LOC_Os01g35110	up
LOC_Os03g63380	up
LOC_Os03g63430	up
LOC_Os03g63490	up
LOC_Os03g63520	down
LOC_Os01g35230	up
LOC_Os01g35330	down
LOC_Os03g63870	down
LOC_Os03g64260	up	OsERF83
LOC_Os04g01140	down	CYP93G1|OsFNSII
LOC_Os04g01674	down
LOC_Os04g02490	up
LOC_Os04g02530	down
LOC_Os04g02860	down
LOC_Os04g04740	down
LOC_Os04g05050	down
LOC_Os04g06280	down
LOC_Os04g06350	down
LOC_Os04g06520	up
LOC_Os04g06850	down
LOC_Os04g08350	down	OsCAS
LOC_Os04g08800	down
LOC_Os04g09350	down
LOC_Os04g09560	up
LOC_Os04g09720	down
LOC_Os04g09810	down
LOC_Os04g10350	down
LOC_Os04g10434	up
LOC_Os04g10460	up
LOC_Os04g10490	down
LOC_Os04g10680	up
LOC_Os04g11570	down
LOC_Os04g12550	up
LOC_Os04g12730	down
LOC_Os04g12744	down
LOC_Os04g12920	down
LOC_Os04g14130	down
LOC_Os04g14200	down
LOC_Os04g14190	up
LOC_Os04g14200	up
LOC_Os04g14710	down
LOC_Os04g15550	down
LOC_Os04g16270	up
LOC_Os04g16940	down
LOC_Os04g17064	down
LOC_Os04g17479	down
LOC_Os04g17730	up
LOC_Os04g18380	down
LOC_Os04g19790	down
LOC_Os04g20164	down
LOC_Os04g20330	up	OscZOG1
LOC_Os04g20400	up
LOC_Os04g21740	down
LOC_Os04g22870	up
LOC_Os04g23590	up
LOC_Os04g23760	up
LOC_Os04g23700	up
LOC_Os04g25784	up
LOC_Os04g26590	up
LOC_Os04g27800	up
LOC_Os04g28090	up
LOC_Os04g28210	down
LOC_Os04g28210	down
LOC_Os04g28620	down
LOC_Os04g30230	up
LOC_Os04g30800	down
LOC_Os01g37500	down
LOC_Os04g31330	down	OsExo70-F3
LOC_Os04g31804	down
LOC_Os04g31790	down
LOC_Os04g31820	up
LOC_Os04g32270	down
LOC_Os04g32350	down	OsRPC53
LOC_Os04g32790	up
LOC_Os04g32970	up
LOC_Os04g33110	down
LOC_Os04g33210	up
LOC_Os04g33340	up
LOC_Os04g33680	down
LOC_Os04g33720	down	OSINV4
LOC_Os04g33880	down
LOC_Os04g35240	down	SAPK7
LOC_Os04g35290	down
LOC_Os04g35890	down
LOC_Os04g36910	down
LOC_Os04g37580	down
LOC_Os04g37720	down
LOC_Os04g38620	up
LOC_Os04g39100	up
LOC_Os01g38660	down
LOC_Os04g39240	up
LOC_Os04g39700	up
LOC_Os04g40490	up
LOC_Os04g40650	down
LOC_Os04g40730	up	WSL3
LOC_Os04g40700	up
LOC_Os04g41060	down
LOC_Os01g04409	down
LOC_Os04g44550	down
LOC_Os04g44730	up
LOC_Os04g44740	up
LOC_Os04g44900	down
LOC_Os04g45610	down
LOC_Os04g46300	down
LOC_Os04g46440	up
LOC_Os04g46880	down
LOC_Os04g47130	up
LOC_Os04g47320	up
LOC_Os04g47300	down	OsCPK12
LOC_Os04g47630	down
LOC_Os04g47720	down
LOC_Os04g47890	up
LOC_Os04g48130	up
LOC_Os04g48140	up
LOC_Os04g48310	down
LOC_Os04g48840	up
LOC_Os04g48960	up
LOC_Os04g49230	up	RAVL1
LOC_Os04g49260	down
LOC_Os04g49280	down
LOC_Os04g49520	down
LOC_Os04g49560	up
LOC_Os04g49748	down
LOC_Os04g50020	down
LOC_Os04g50670	down
LOC_Os04g50970	down
LOC_Os04g51280	down	WSP1
LOC_Os04g51480	down
LOC_Os04g52210	up
LOC_Os04g52450	down	Osl2
LOC_Os04g52660	down
LOC_Os04g52630	down
LOC_Os04g52750	up
LOC_Os04g52930	up
LOC_Os04g52940	down
LOC_Os04g53000	down
LOC_Os04g53240	up
LOC_Os04g53310	up
LOC_Os04g53520	down
LOC_Os04g54110	down
LOC_Os04g54390	up
LOC_Os04g54640	down
LOC_Os04g54730	up
LOC_Os04g54810	up
LOC_Os04g55420	up
LOC_Os04g55560	down	SHAT1
LOC_Os04g55930	up
LOC_Os04g57130	down
LOC_Os04g57770	down
LOC_Os01g41120	up
LOC_Os01g01040	down
LOC_Os01g01019	down
LOC_Os01g01030	down
LOC_Os04g59380	down
LOC_Os04g59430	up
LOC_Os05g01510	down
LOC_Os01g41530	up
LOC_Os05g01950	up
LOC_Os01g41565	up
LOC_Os05g02680	up
LOC_Os05g02770	down
LOC_Os05g02820	down
LOC_Os05g02970	up
LOC_Os05g03460	down
LOC_Os05g04215	up
LOC_Os05g04750	down
LOC_Os05g05180	down
LOC_Os01g41950	up
LOC_Os01g42000	down
LOC_Os05g06970	up
LOC_Os05g07210	down	OsZIP6
LOC_Os05g07626	down
LOC_Os05g08460	down
LOC_Os05g08800	up
LOC_Os05g09530	up
LOC_Os05g09580	down
LOC_Os05g10414	down
LOC_Os05g10560	down
LOC_Os05g10570	down
LOC_Os05g10900	up
LOC_Os05g10910	up
LOC_Os05g11840	up
LOC_Os05g12380	down
LOC_Os05g12481	up
LOC_Os01g42370	up
LOC_Os05g15370	down
LOC_Os05g15630	down	OsBLE3
LOC_Os05g20304	up
LOC_Os05g20630	up
LOC_Os05g22840	down
LOC_Os05g23610	down
LOC_Os05g23850	down
LOC_Os05g23924	up
LOC_Os05g23950	up
LOC_Os05g24560	up
LOC_Os05g25070	down
LOC_Os05g25260	up
LOC_Os05g25390	down
LOC_Os05g25974	down
LOC_Os05g25974	down
LOC_Os05g26070	down
LOC_Os05g26660	up
LOC_Os05g28090	down
LOC_Os05g29750	down
LOC_Os01g43090	up
LOC_Os05g30500	up	RH1
LOC_Os05g31040	down
LOC_Os05g31740	up
LOC_Os05g32360	down
LOC_Os05g32500	up
LOC_Os05g33500	up
LOC_Os01g43430	down
LOC_Os05g33940	up	HSR203J
LOC_Os05g34110	down
LOC_Os05g34240	down
LOC_Os05g34580	up
LOC_Os01g43510	down
LOC_Os05g34800	down
LOC_Os05g35150	down
LOC_Os05g35200	down
LOC_Os05g35340	down
LOC_Os05g35360	up
LOC_Os05g35730	up
LOC_Os01g43610	down	OsOFP2
LOC_Os05g36340	down
LOC_Os05g36360	up	OsPUB44
LOC_Os05g36994	down
LOC_Os05g37170	down
LOC_Os05g37340	up
LOC_Os05g37640	down
LOC_Os05g37650	up
LOC_Os05g38130	down
LOC_Os05g38219	down
LOC_Os05g38710	down
LOC_Os01g43870	down
LOC_Os05g40280	down
LOC_Os05g40590	up
LOC_Os01g44069	down
LOC_Os05g41200	up
LOC_Os05g41210	up	OsCam2
LOC_Os01g44100	up
LOC_Os05g42160	down
LOC_Os05g43680	up
LOC_Os05g43850	down
LOC_Os05g44180	up	OsFTL10
LOC_Os05g45080	up
LOC_Os05g45180	up
LOC_Os01g45040	up
LOC_Os05g46740	up
LOC_Os05g47650	up
LOC_Os05g47820	up
LOC_Os01g45200	down	Snl6
LOC_Os01g03060	up
LOC_Os05g49250	up
LOC_Os05g49630	down
LOC_Os05g50060	up
LOC_Os05g50290	down
LOC_Os05g50330	down
LOC_Os05g50330	down
LOC_Os05g50560	up	OsMPK9
LOC_Os05g50570	up
LOC_Os05g50650	down
LOC_Os05g50750	down
LOC_Os05g51050	down
LOC_Os05g51520	up
LOC_Os06g01210	down
LOC_Os06g01320	up
LOC_Os06g01770	up
LOC_Os06g02000	up
LOC_Os06g03670	up
LOC_Os06g04240	up
LOC_Os06g04830	down
LOC_Os06g04930	down
LOC_Os06g05355	down
LOC_Os06g05560	up
LOC_Os06g05620	up
LOC_Os06g05630	up
LOC_Os06g06610	up
LOC_Os06g06670	up
LOC_Os06g06660	up
LOC_Os06g06680	up
LOC_Os06g06780	down
LOC_Os06g07240	up
LOC_Os06g07390	down
LOC_Os06g07590	down
LOC_Os06g08620	down
LOC_Os06g08890	down
LOC_Os06g08884	down
LOC_Os01g46840	up
LOC_Os06g09020	up
LOC_Os06g09090	up
LOC_Os06g09120	up
LOC_Os01g46932	down
LOC_Os01g46926	down	OsUBC5a
LOC_Os06g09950	down
LOC_Os06g10355	up
LOC_Os06g10730	down
LOC_Os06g11010	down	S5(ORF5)
LOC_Os06g11090	down
LOC_Os06g12210	up	BU1|OsbHLH174
LOC_Os06g12170	down
LOC_Os01g47360	down
LOC_Os06g12730	down
LOC_Os06g13830	down
LOC_Os06g13860	up
LOC_Os06g14324	down
LOC_Os06g14870	down
LOC_Os06g15560	down
LOC_Os06g15700	up
LOC_Os06g16270	down	OsHSBP2
LOC_Os01g47540	down
LOC_Os06g16630	down
LOC_Os06g17050	down
LOC_Os06g17130	up
LOC_Os06g17130	up
LOC_Os06g17950	up	Pid4
LOC_Os06g18670	down
LOC_Os06g19170	up
LOC_Os06g19370	up
LOC_Os06g19380	down
LOC_Os06g19550	down
LOC_Os06g19650	up
LOC_Os06g20760	down
LOC_Os06g20860	up
LOC_Os06g21120	up
LOC_Os06g21369	down
LOC_Os06g21600	up
LOC_Os06g21620	up
LOC_Os06g22394	up
LOC_Os06g22460	up	Pi25|Pid3
LOC_Os06g22919	down
LOC_Os06g23350	down
LOC_Os06g23540	down
LOC_Os06g24240	down
LOC_Os06g25930	up
LOC_Os06g25500	up
LOC_Os01g48110	up
LOC_Os01g48120	up
LOC_Os06g27900	down
LOC_Os06g28124	down
LOC_Os06g28240	up
LOC_Os06g28840	down
LOC_Os06g28970	up
LOC_Os06g29690	down
LOC_Os06g30660	down
LOC_Os06g30920	down
LOC_Os06g31220	down
LOC_Os06g32550	down
LOC_Os01g48410	down
LOC_Os06g33340	down
LOC_Os06g33930	down
LOC_Os06g34780	up
LOC_Os06g35500	up
LOC_Os01g48650	up
LOC_Os06g35520	down
LOC_Os06g35960	up
LOC_Os06g37130	down
LOC_Os06g37440	down
LOC_Os06g38210	down
LOC_Os06g38650	down
LOC_Os06g38710	up
LOC_Os06g38730	down
LOC_Os06g38780	down
LOC_Os06g39040	up
LOC_Os06g39130	down
LOC_Os06g39708	up
LOC_Os01g03310	down
LOC_Os06g40750	up
LOC_Os06g40940	up
LOC_Os06g41120	down
LOC_Os01g49150	down
LOC_Os06g41840	up
LOC_Os01g49110	up
LOC_Os06g42810	up
LOC_Os01g49190	down
LOC_Os06g43180	down
LOC_Os06g43160	up
LOC_Os01g03330	down
LOC_Os06g44034	down	SDT
LOC_Os06g44040	down
LOC_Os06g44190	down
LOC_Os06g44540	down
LOC_Os01g49310	down
LOC_Os06g45040	up
LOC_Os01g03350	up
LOC_Os01g03330	up
LOC_Os01g03340	up
LOC_Os06g45350	up
LOC_Os01g49370	down
LOC_Os06g45610	up
LOC_Os06g46590	down
LOC_Os06g46770	up
LOC_Os06g46995	down
LOC_Os06g47100	up
LOC_Os06g47120	up
LOC_Os06g47430	up
LOC_Os06g47570	down
LOC_Os06g47780	down
LOC_Os06g48020	down
LOC_Os06g48060	up	STAR1
LOC_Os06g48590	down	OsMAPK4|OsMSRMK3
LOC_Os06g48880	up
LOC_Os06g49020	down
LOC_Os06g49410	down
LOC_Os06g49890	down
LOC_Os06g49920	down
LOC_Os06g49930	down
LOC_Os06g49980	down
LOC_Os06g50310	down	APIP5|OsbZIP53
LOC_Os06g50450	up
LOC_Os06g50580	up
LOC_Os06g50590	up
LOC_Os06g50590	up
LOC_Os06g50600	down
LOC_Os06g50679	down
LOC_Os06g50940	down
LOC_Os06g51050	down	Cht-3
LOC_Os06g51240	up
LOC_Os06g51500	up
LOC_Os06g51530	up
LOC_Os06g51524	up
LOC_Os07g01880	up
LOC_Os07g01890	up
LOC_Os07g02360	down
LOC_Os07g03120	down
LOC_Os07g03830	up
LOC_Os07g04340	up
LOC_Os07g04440	down
LOC_Os07g04650	up
LOC_Os07g04730	up
LOC_Os01g50310	up
LOC_Os07g05260	up
LOC_Os07g05290	down
LOC_Os01g03410	down
LOC_Os07g06080	down
LOC_Os07g06530	down
LOC_Os07g07000	down
LOC_Os07g07500	down
LOC_Os07g07530	up
LOC_Os07g08710	up
LOC_Os07g08520	up
LOC_Os07g09020	up
LOC_Os07g09110	down
LOC_Os07g09420	up
LOC_Os07g10960	down
LOC_Os07g12510	down
LOC_Os01g50990	down
LOC_Os07g12910	down
LOC_Os07g17230	down
LOC_Os07g17689	down
LOC_Os07g18050	up
LOC_Os01g51280	down
LOC_Os07g18300	up
LOC_Os07g18710	up
LOC_Os07g19540	down
LOC_Os07g20544	down
LOC_Os07g23970	up
LOC_Os07g24050	down
LOC_Os07g24090	up
LOC_Os07g25510	down
LOC_Os07g25740	down
LOC_Os07g26100	up
LOC_Os01g51770	up
LOC_Os07g28570	down
LOC_Os07g29080	up
LOC_Os07g29300	down
LOC_Os07g29310	down
LOC_Os07g30800	down
LOC_Os07g30840	up
LOC_Os07g31000	down
LOC_Os01g52100	down
LOC_Os07g31670	up
LOC_Os01g52214	down
LOC_Os07g33420	down
LOC_Os07g34020	up
LOC_Os07g35050	up
LOC_Os07g35300	down
LOC_Os07g35310	up
LOC_Os07g35335	up
LOC_Os07g35370	down
LOC_Os07g35390	down
LOC_Os07g35480	down
LOC_Os07g36040	down
LOC_Os07g36060	down
LOC_Os01g52500	down	NADP-ME2|OsNADP-ME2
LOC_Os07g36610	down
LOC_Os07g37150	down
LOC_Os07g37180	down
LOC_Os07g37680	down
LOC_Os07g37820	up
LOC_Os01g03630	up	OsLPR3
LOC_Os07g38120	down
LOC_Os07g38290	down
LOC_Os07g38470	down
LOC_Os07g39210	down
LOC_Os07g39190	down
LOC_Os01g52720	down
LOC_Os07g39960	down
LOC_Os07g40140	down
LOC_Os07g40320	up
LOC_Os07g40780	up
LOC_Os07g41170	down
LOC_Os07g41660	up
LOC_Os07g41840	down
LOC_Os01g52980	up
LOC_Os07g42490	down	RSUS3|SUS3
LOC_Os07g42714	up
LOC_Os07g43070	down
LOC_Os07g43060	up
LOC_Os07g43370	down
LOC_Os07g43510	down
LOC_Os07g44030	up
LOC_Os07g44070	up
LOC_Os07g44320	up
LOC_Os07g44350	up	OsNPSN13
LOC_Os07g44770	down
LOC_Os07g45170	down
LOC_Os07g45194	up
LOC_Os07g45570	down	OsBLE2
LOC_Os07g45750	down
LOC_Os07g46060	down
LOC_Os07g46100	down
LOC_Os07g46090	down
LOC_Os07g46090	down
LOC_Os07g46130	up
LOC_Os07g46350	down
LOC_Os07g46780	down
LOC_Os07g47460	down
LOC_Os07g47790	up
LOC_Os01g53420	up
LOC_Os07g47970	down
LOC_Os07g48090	down
LOC_Os07g48280	up
LOC_Os07g48350	up
LOC_Os01g53450	up
LOC_Os07g48520	down
LOC_Os07g48900	up
LOC_Os07g49150	down
LOC_Os08g01030	up
LOC_Os08g01100	up
LOC_Os08g01810	up
LOC_Os08g02410	down
LOC_Os08g03300	up
LOC_Os08g03590	down
LOC_Os08g03579	down
LOC_Os08g03620	up
LOC_Os08g03670	down
LOC_Os08g04140	down
LOC_Os08g04460	down
LOC_Os01g53810	down
LOC_Os01g53820	down
LOC_Os08g04790	up
LOC_Os08g05970	down
LOC_Os08g06780	down
LOC_Os08g06810	down
LOC_Os08g07340	up
LOC_Os08g07300	down
LOC_Os08g07910	up
LOC_Os08g08570	down
LOC_Os08g08586	down
LOC_Os08g08592	down
LOC_Os08g08650	down
LOC_Os08g08970	down
LOC_Os08g09340	up
LOC_Os08g09380	up
LOC_Os08g09450	up
LOC_Os08g10080	down	OMTN6
LOC_Os08g10620	down
LOC_Os08g12680	up
LOC_Os08g13060	down
LOC_Os08g13090	down
LOC_Os08g13310	up
LOC_Os08g13630	down
LOC_Os08g14350	up
LOC_Os01g54560	down
LOC_Os08g14620	up
LOC_Os08g14860	up
LOC_Os08g14990	up
LOC_Os08g14890	down
LOC_Os08g15444	down
LOC_Os08g15590	down
LOC_Os08g15600	down
LOC_Os08g15650	up
LOC_Os08g16010	down
LOC_Os08g16580	up
LOC_Os08g18000	up
LOC_Os08g18894	down
LOC_Os08g19105	up
LOC_Os08g19114	down
LOC_Os08g19374	down
LOC_Os08g19470	down
LOC_Os01g54770	down
LOC_Os08g19910	up
LOC_Os08g22604	down
LOC_Os08g22864	down
LOC_Os08g23320	up	OsPPT1
LOC_Os01g54980	up
LOC_Os08g24140	down
LOC_Os08g24250	down
LOC_Os08g24290	down
LOC_Os01g54990	up
LOC_Os08g24930	down
LOC_Os08g25050	down
LOC_Os08g25380	down	OsBRL3
LOC_Os08g25430	down
LOC_Os08g26880	down
LOC_Os01g55050	up
LOC_Os08g27090	down
LOC_Os08g27210	down
LOC_Os08g27220	down
LOC_Os08g28200	up
LOC_Os08g28460	down
LOC_Os08g28580	down
LOC_Os08g28740	down
LOC_Os08g28820	down
LOC_Os08g28800	down
LOC_Os08g28890	down
LOC_Os01g55150	up
LOC_Os08g29660	down
LOC_Os08g29669	down
LOC_Os08g29854	down
LOC_Os08g29770	down
LOC_Os08g29950	down
LOC_Os08g30020	down
LOC_Os01g55190	down
LOC_Os08g30520	down
LOC_Os08g30860	down
LOC_Os08g31350	up
LOC_Os08g31340	up
LOC_Os01g55270	up
LOC_Os08g31720	up
LOC_Os08g31730	down
LOC_Os08g32310	down
LOC_Os08g32870	up	OsBADH2|fgr
LOC_Os08g33210	down
LOC_Os08g34050	down
LOC_Os08g34870	up
LOC_Os08g34879	up
LOC_Os08g35939	down
LOC_Os08g36220	down
LOC_Os08g37140	down
LOC_Os08g37456	up
LOC_Os08g38470	down
LOC_Os08g38780	up	OsHAP5D
LOC_Os08g39140	up	hsp82A
LOC_Os08g40120	down
LOC_Os08g40150	down
LOC_Os01g56050	down
LOC_Os08g40610	down
LOC_Os08g41250	up
LOC_Os08g41489	up
LOC_Os08g41960	up
LOC_Os08g41990	up
LOC_Os08g42290	down
LOC_Os08g42210	down
LOC_Os08g42390	up
LOC_Os08g42960	up
LOC_Os08g43190	down
LOC_Os08g43220	down
LOC_Os08g43240	up
LOC_Os08g43550	down
LOC_Os01g56470	down	XB24
LOC_Os08g44620	up
LOC_Os08g44850	down
LOC_Os08g45070	down
LOC_Os09g01140	down
LOC_Os09g02060	down
LOC_Os09g03310	down
LOC_Os09g04384	up
LOC_Os09g04300	down
LOC_Os09g04310	down
LOC_Os01g56710	up
LOC_Os01g56730	up
LOC_Os09g06770	down
LOC_Os01g56740	up
LOC_Os09g07500	down
LOC_Os09g08030	down
LOC_Os09g08710	up
LOC_Os09g09690	down
LOC_Os09g10000	down
LOC_Os01g56850	down
LOC_Os09g11280	up
LOC_Os09g11890	down
LOC_Os09g12650	up
LOC_Os09g12750	up	OsPHL3
LOC_Os09g12970	down
LOC_Os09g14614	up
LOC_Os09g15840	down
LOC_Os01g57250	down
LOC_Os09g16449	down
LOC_Os09g16520	up
LOC_Os09g16714	up
LOC_Os09g16910	up
LOC_Os09g16780	up
LOC_Os09g17049	up
LOC_Os09g17120	down
LOC_Os01g57280	down
LOC_Os09g17580	up
LOC_Os09g17760	down
LOC_Os01g57310	down	Pi37
LOC_Os09g18560	up
LOC_Os09g19380	down
LOC_Os09g19720	up
LOC_Os09g20260	down
LOC_Os09g20350	down
LOC_Os09g20350	up
LOC_Os01g57380	up
LOC_Os09g21210	up
LOC_Os09g21340	down
LOC_Os09g21360	down
LOC_Os09g21740	up
LOC_Os09g22000	down
LOC_Os09g22090	up
LOC_Os09g22410	up
LOC_Os09g24170	down
LOC_Os09g24860	down
LOC_Os09g25070	down	OsWRKY62
LOC_Os01g57550	up
LOC_Os09g25470	up
LOC_Os09g25740	down
LOC_Os09g25880	down
LOC_Os09g25950	down
LOC_Os09g25934	down
LOC_Os09g26110	down
LOC_Os09g26300	down
LOC_Os09g26320	down
LOC_Os09g26330	down
LOC_Os09g26530	down
LOC_Os09g26540	down
LOC_Os09g26554	down
LOC_Os09g26560	down
LOC_Os09g26550	down
LOC_Os09g26620	down
LOC_Os09g26900	up
LOC_Os09g27210	down
LOC_Os01g05090	down
LOC_Os09g27734	down
LOC_Os09g27750	up	OsACO2
LOC_Os09g27900	up
LOC_Os09g28560	up
LOC_Os09g28690	up
LOC_Os09g28840	down
LOC_Os09g29080	up
LOC_Os09g29100	down
LOC_Os09g29270	down
LOC_Os09g29360	down
LOC_Os09g29490	up
LOC_Os09g30300	down
LOC_Os09g31200	down	OSISAP1
LOC_Os09g31430	down
LOC_Os09g31470	down	OsAHL2|AHL2
LOC_Os09g32140	down
LOC_Os09g32410	down
LOC_Os09g32960	down
LOC_Os09g33790	up
LOC_Os09g33800	up
LOC_Os09g34090	up
LOC_Os09g34310	up
LOC_Os09g34320	down
LOC_Os09g34340	down
LOC_Os01g58240	down	RSP1
LOC_Os09g36890	up	OsMED4
LOC_Os09g37460	up
LOC_Os09g37540	down	OsLDC-like1
LOC_Os09g37580	up
LOC_Os09g37720	down	OsU11|U12-31K
LOC_Os09g38020	up
LOC_Os09g38150	down
LOC_Os09g38300	up
LOC_Os09g38480	down
LOC_Os09g38640	down
LOC_Os09g39280	down
LOC_Os09g39430	down
LOC_Os09g39780	up	OsCYP-25|CYP19-3
LOC_Os01g59050	up
LOC_Os01g59300	up
LOC_Os01g05220	up
LOC_Os01g59550	down
LOC_Os01g60110	up
LOC_Os01g60170	up
LOC_Os01g60680	up
LOC_Os01g60700	down
LOC_Os01g60910	up
LOC_Os01g61940	down	OsABCG3
LOC_Os01g62000	down
LOC_Os01g05540	down
LOC_Os01g62750	down
LOC_Os01g05530	up
LOC_Os01g62860	down	OsAKR1|OsI_04426
LOC_Os01g62990	down	OsRacGEF1
LOC_Os01g63410	up
LOC_Os01g63854	down
LOC_Os01g63870	up
LOC_Os01g05620	up	Pit
LOC_Os01g05660	up
LOC_Os01g64120	up
LOC_Os01g64230	down
LOC_Os01g64810	down
LOC_Os01g64820	up
LOC_Os01g65630	down
LOC_Os01g65780	down
LOC_Os01g66040	down
LOC_Os01g66310	down
LOC_Os01g66440	up
LOC_Os01g05840	down
LOC_Os01g66530	up
LOC_Os01g66840	down
LOC_Os01g67150	up
LOC_Os01g05940	down
LOC_Os01g67550	down
LOC_Os01g05960	down
LOC_Os01g67730	down
LOC_Os01g68070	down
LOC_Os01g68545	down
LOC_Os01g69290	up
LOC_Os01g70260	up
LOC_Os01g06440	up
LOC_Os01g70525	down
LOC_Os01g70600	down
LOC_Os01g06454	down
LOC_Os01g70920	up
LOC_Os01g06510	down
LOC_Os01g72250	down
LOC_Os01g72330	down	OsRR4
LOC_Os01g72380	up
LOC_Os01g72410	down
LOC_Os01g72630	up
LOC_Os01g72650	down
LOC_Os01g73450	up	YGL8|YL2
LOC_Os01g73470	down
LOC_Os01g74020	down	OsPCL1
LOC_Os01g74190	up
LOC_Os01g06910	up
LOC_Os01g74330	down
LOC_Os01g74340	down
LOC_Os01g74540	down
LOC_Os01g74660	down
LOC_Os10g02220	up
LOC_Os10g03100	down
LOC_Os10g03490	down
LOC_Os10g04270	down
LOC_Os01g07140	up
LOC_Os10g03730	down
LOC_Os10g05180	down
LOC_Os10g05860	down
LOC_Os10g08011	down
LOC_Os10g08780	up
LOC_Os01g07376	up
LOC_Os10g10180	down
LOC_Os10g10880	down
LOC_Os10g11012	down
LOC_Os10g11060	down
LOC_Os10g13694	down
LOC_Os10g13800	up
LOC_Os10g14011	down
LOC_Os10g14170	down
LOC_Os10g14180	down
LOC_Os10g16930	down
LOC_Os01g07660	down
LOC_Os10g19180	up
LOC_Os10g19980	up
LOC_Os10g20080	up
LOC_Os10g19970	up
LOC_Os10g20060	up
LOC_Os10g20990	down
LOC_Os01g07750	down
LOC_Os10g21268	down	OsrbcL1
LOC_Os01g07780	up
LOC_Os10g21640	down
LOC_Os10g21930	down
LOC_Os10g22100	down
LOC_Os10g22170	down
LOC_Os10g22484	down
LOC_Os10g22630	down
LOC_Os10g22720	down
LOC_Os10g25010	down
LOC_Os10g25060	up
LOC_Os10g27330	down
LOC_Os10g28130	down
LOC_Os01g08120	up
LOC_Os10g28610	down
LOC_Os10g28680	down
LOC_Os10g29240	up
LOC_Os10g30550	down
LOC_Os10g30690	up
LOC_Os10g30719	down
LOC_Os10g30970	down
LOC_Os10g31690	down
LOC_Os10g31940	down
LOC_Os10g32199	down
LOC_Os01g08350	down
LOC_Os10g33140	down
LOC_Os10g33170	up
LOC_Os10g33920	down
LOC_Os01g08440	up
LOC_Os10g34083	up
LOC_Os10g34150	down
LOC_Os10g34670	down
LOC_Os10g34720	up
LOC_Os10g34730	up
LOC_Os10g34795	down
LOC_Os10g35290	up
LOC_Os10g35800	up
LOC_Os10g35980	up
LOC_Os10g35990	down
LOC_Os10g36030	down
LOC_Os10g36270	down
LOC_Os10g36260	down
LOC_Os10g36350	down
LOC_Os10g36580	down
LOC_Os10g36924	up	OsNIP3;1|DTE1
LOC_Os10g38020	up
LOC_Os10g38238	down
LOC_Os10g38580	down
LOC_Os01g08820	down
LOC_Os10g39130	down	OsMADS56
LOC_Os10g39780	down
LOC_Os10g40070	down
LOC_Os10g40450	down
LOC_Os10g40640	down	OsGGT
LOC_Os10g41170	down
LOC_Os01g09020	down
LOC_Os10g41360	down
LOC_Os10g41550	down
LOC_Os10g42060	up
LOC_Os10g42220	down
LOC_Os10g42430	up	OsMYC2
LOC_Os10g42830	down
LOC_Os10g42930	down
LOC_Os11g01280	down
LOC_Os01g09470	down	GW5L
LOC_Os11g01990	down
LOC_Os11g02090	down
LOC_Os11g02400	down
LOC_Os11g02379	down
LOC_Os11g02389	down	OsLTP5
LOC_Os01g09340	down
LOC_Os11g02730	up
LOC_Os11g03420	up
LOC_Os11g03510	down
LOC_Os11g03730	down	OsARAF3
LOC_Os11g04240	up
LOC_Os11g04230	down
LOC_Os11g04730	up
LOC_Os11g04800	up
LOC_Os11g04920	down
LOC_Os11g05270	up
LOC_Os11g06130	down
LOC_Os01g09800	down	OsNPR1|NH1
LOC_Os11g06240	up
LOC_Os11g06650	down
LOC_Os11g06934	down
LOC_Os11g07010	up
LOC_Os11g07000	up
LOC_Os11g07060	down
LOC_Os11g07120	down
LOC_Os11g07130	up
LOC_Os11g07260	down
LOC_Os11g07480	up
LOC_Os11g07580	up
LOC_Os01g09940	up
LOC_Os11g07720	down
LOC_Os11g07860	down
LOC_Os11g08100	down
LOC_Os11g08300	down
LOC_Os11g08940	down
LOC_Os11g08830	down
LOC_Os11g08840	up
LOC_Os11g09200	up
LOC_Os11g09590	down
LOC_Os11g09710	down
LOC_Os11g09740	down
LOC_Os11g09770	up
LOC_Os11g10160	down
LOC_Os11g10200	down
LOC_Os11g10600	down
LOC_Os11g10910	down
LOC_Os11g11100	up
LOC_Os11g11550	down
LOC_Os11g11650	up
LOC_Os11g11640	up
LOC_Os11g11890	down
LOC_Os11g13680	up
LOC_Os11g13680	up
LOC_Os11g14544	down
LOC_Os11g15000	down
LOC_Os11g15580	up
LOC_Os11g17290	down
LOC_Os11g18194	down
LOC_Os11g18366	down
LOC_Os11g19730	down
LOC_Os11g19764	up
LOC_Os11g19790	down
LOC_Os11g20239	down
LOC_Os11g20330	down
LOC_Os11g20370	down
LOC_Os11g20310	down	Os11Gsk
LOC_Os11g20384	down
LOC_Os11g22396	down
LOC_Os11g23880	down
LOC_Os11g24050	down
LOC_Os11g24824	down
LOC_Os11g24890	down
LOC_Os11g25020	down
LOC_Os11g25100	down
LOC_Os11g25090	down
LOC_Os11g25130	down
LOC_Os11g26350	down
LOC_Os11g26780	down
LOC_Os11g27120	down
LOC_Os11g27250	down
LOC_Os11g27430	up
LOC_Os11g27430	down
LOC_Os11g27799	down
LOC_Os11g28270	down
LOC_Os11g29130	down
LOC_Os11g29750	down
LOC_Os11g30370	down
LOC_Os11g31450	up
LOC_Os11g31470	down
LOC_Os11g31705	down
LOC_Os11g31700	down
LOC_Os11g32100	up	OsICE1
LOC_Os11g33180	down
LOC_Os11g33310	down
LOC_Os11g33320	down
LOC_Os11g34270	down	OsSpo11-5
LOC_Os11g34760	down
LOC_Os11g34840	down
LOC_Os11g34770	down
LOC_Os11g34790	down
LOC_Os11g34810	down
LOC_Os11g34820	down
LOC_Os11g34970	down
LOC_Os11g34850	down
LOC_Os11g35710	up	OsOSC11|OsIAS1
LOC_Os11g36070	down
LOC_Os11g37250	down
LOC_Os01g11650	down
LOC_Os11g37510	up
LOC_Os11g37560	up
LOC_Os11g37759	up
LOC_Os11g37920	down
LOC_Os11g37950	down
LOC_Os11g38330	down
LOC_Os11g38390	down
LOC_Os11g38590	down
LOC_Os11g38630	up
LOC_Os11g38650	down
LOC_Os11g39220	up	OsACX2
LOC_Os01g11910	down
LOC_Os11g39568	up
LOC_Os11g39850	up
LOC_Os11g40110	down
LOC_Os11g40249	down
LOC_Os11g40410	down
LOC_Os11g40560	down
LOC_Os11g41170	down
LOC_Os11g41365	down
LOC_Os11g41510	down
LOC_Os11g41530	down
LOC_Os11g41650	down
LOC_Os11g41900	up
LOC_Os01g12080	down
LOC_Os11g42040	down
LOC_Os11g42010	up
LOC_Os11g42070	down
LOC_Os11g42360	down
LOC_Os11g42800	down
LOC_Os11g43070	down
LOC_Os11g43490	down
LOC_Os11g43934	up
LOC_Os11g43990	down
LOC_Os11g44310	down
LOC_Os01g12260	up
LOC_Os11g46070	up
LOC_Os11g45809	up
LOC_Os01g12304	down
LOC_Os11g47130	down
LOC_Os11g47580	down	RIXI|C10701
LOC_Os01g12381	down
LOC_Os11g47710	down
LOC_Os11g47809	down	OsMT1a|rgMT
LOC_Os01g12340	down
LOC_Os01g12374	down
LOC_Os11g47980	up
LOC_Os12g01010	up	OsRBD1
LOC_Os12g01350	down
LOC_Os12g01390	up
LOC_Os12g02050	down
LOC_Os12g02130	up
LOC_Os12g02390	up
LOC_Os12g02385	up
LOC_Os12g02540	down
LOC_Os12g02660	up
LOC_Os12g03290	down
LOC_Os12g03700	down
LOC_Os12g04750	up
LOC_Os12g04990	down
LOC_Os12g05090	down
LOC_Os12g05715	up
LOC_Os12g06490	up	OsWNK9
LOC_Os12g06660	down
LOC_Os12g06810	down
LOC_Os12g07020	down
LOC_Os12g07050	down
LOC_Os12g07180	down
LOC_Os12g07300	down
LOC_Os12g09590	down
LOC_Os12g10450	down
LOC_Os12g10540	down	OsMADS13
LOC_Os12g10590	down
LOC_Os12g11830	up
LOC_Os12g12120	up
LOC_Os12g12664	down
LOC_Os12g12690	down
LOC_Os12g13295	down
LOC_Os12g13570	up
LOC_Os12g13930	down	KAR
LOC_Os12g14110	up
LOC_Os12g16690	down
LOC_Os12g17370	up
LOC_Os12g18360	down	Pita|Pi-4a
LOC_Os12g18880	up
LOC_Os01g13610	down
LOC_Os12g20410	down
LOC_Os12g23450	up
LOC_Os01g13800	down
LOC_Os12g23610	down
LOC_Os12g23780	down
LOC_Os12g24020	down
LOC_Os12g24084	down
LOC_Os01g13830	up
LOC_Os12g24310	down
LOC_Os12g25210	up
LOC_Os12g26480	up
LOC_Os01g14030	down
LOC_Os12g28100	down
LOC_Os12g27335	down
LOC_Os12g27690	up
LOC_Os12g29480	up
LOC_Os01g14310	up
LOC_Os12g32130	down
LOC_Os12g32130	up
LOC_Os12g32310	down
LOC_Os12g32370	down
LOC_Os12g32670	down
LOC_Os12g33160	down
LOC_Os12g33180	down
LOC_Os12g33194	down
LOC_Os12g33300	down
LOC_Os12g33415	down
LOC_Os12g33958	down
LOC_Os12g34054	down
LOC_Os12g34796	down
LOC_Os12g35070	down
LOC_Os12g35080	up
LOC_Os12g35610	down	Osrboh9|OsRBOHH
LOC_Os12g35820	down
LOC_Os12g36320	down
LOC_Os12g36400	down
LOC_Os01g14770	down
LOC_Os01g14820	up
LOC_Os12g37100	up
LOC_Os12g37160	down
LOC_Os12g37530	down
LOC_Os12g37860	up
LOC_Os12g37900	up
LOC_Os12g38040	down
LOC_Os12g38570	up
LOC_Os12g38930	up
LOC_Os12g38930	down
LOC_Os12g39440	down
LOC_Os12g39710	down
LOC_Os01g15170	up
LOC_Os12g40340	up
LOC_Os12g41460	up
LOC_Os12g41480	down
LOC_Os12g41510	down
LOC_Os12g41540	up
LOC_Os12g41650	down	OsPIL11
LOC_Os12g41910	down
LOC_Os01g15350	down
LOC_Os12g42150	down
LOC_Os12g42900	down
LOC_Os12g43150	up
LOC_Os01g15520	down	SAD1L
LOC_Os12g43640	down
LF and H1 indicate low pollen fertility recombinant inbred line and neo-tetraploid rice, respectively

## Sheet: Table S3
Table S3 Differentially expressed genes (DEGs) between HF and LF
gene_id	regulation	GeneName
LOC_Os01g02130	down
LOC_Os01g02950	down
LOC_Os01g15990	down
LOC_Os01g20850	up
LOC_Os01g21020	up
LOC_Os01g25720	up
LOC_Os01g29860	down
LOC_Os01g32160	up
LOC_Os01g36820	down
LOC_Os01g39590	up
LOC_Os01g57500	down
LOC_Os01g58930	up
LOC_Os01g60690	up
LOC_Os01g62130	down
LOC_Os01g65690	down
LOC_Os02g06240	up
LOC_Os02g09830	down	OsbZIP16
LOC_Os02g20060	down
LOC_Os02g24612	down
LOC_Os02g36280	up	CYP76M6
LOC_Os02g36670	up
LOC_Os02g40630	up
LOC_Os02g45270	up
LOC_Os02g51910	down
LOC_Os02g55580	up
LOC_Os03g02050	up	LTP2|nsLTP2
LOC_Os03g25240	down
LOC_Os03g28130	down
LOC_Os03g28160	up
LOC_Os03g51556	down
LOC_Os03g56480	up
LOC_Os03g59770	up
LOC_Os04g08250	up
LOC_Os04g12600	up	OsLecRK4
LOC_Os04g13040	down
LOC_Os04g20490	down
LOC_Os04g41740	up
LOC_Os04g42020	down
LOC_Os04g42460	up
LOC_Os04g42970	up
LOC_Os04g48870	down
LOC_Os05g13850	up
LOC_Os05g16750	down
LOC_Os05g33580	down
LOC_Os05g34570	up
LOC_Os05g34655	down
LOC_Os05g36970	up
LOC_Os05g38020	up
LOC_Os05g46300	down
LOC_Os05g48830	up
LOC_Os05g51360	down	OsEBS
LOC_Os06g01340	down	OsCCT19
LOC_Os06g02320	up
LOC_Os06g04630	down
LOC_Os06g12310	down	Lsi6
LOC_Os06g16610	down
LOC_Os06g20820	down
LOC_Os06g21690	up
LOC_Os06g36410	up
LOC_Os06g43440	down
LOC_Os07g03368	up
LOC_Os07g03458	down
LOC_Os07g10254	up
LOC_Os07g15959	up
LOC_Os07g27650	up
LOC_Os07g34880	up
LOC_Os07g40870	down
LOC_Os07g44930	down
LOC_Os08g08440	up
LOC_Os08g13000	up
LOC_Os08g15246	down
LOC_Os08g17000	up
LOC_Os08g27020	up
LOC_Os08g30014	up
LOC_Os08g35580	up
LOC_Os08g41360	up
LOC_Os08g41820	up
LOC_Os09g10300	up
LOC_Os09g21050	up
LOC_Os09g36850	down
LOC_Os10g02040	down
LOC_Os10g29410	up
LOC_Os10g33190	down
LOC_Os10g39870	up
LOC_Os11g02290	down
LOC_Os11g02424	down
LOC_Os11g02710	up
LOC_Os11g05770	up
LOC_Os11g15710	up
LOC_Os11g24550	up
LOC_Os11g29060	up
LOC_Os11g29740	up
LOC_Os11g38070	down
LOC_Os11g41940	down
LOC_Os11g42170	down
LOC_Os12g02930	up
LOC_Os12g05180	down
LOC_Os12g07760	up
LOC_Os12g08480	down
LOC_Os12g08930	down
LOC_Os12g18210	up
LOC_Os12g34524	up
LOC_Os12g36070	down
LOC_Os12g39690	up
LOC_Os12g43970	up
LOC_Os12g43940	down
LOC_Os12g44300	up
LOC_Os02g01110	down
LOC_Os02g01230	up
LOC_Os02g01590	down	OSINV3
LOC_Os01g15610	up
LOC_Os01g02720	down	LMM5.1|SPL33
LOC_Os01g15640	up
LOC_Os01g15740	up
LOC_Os02g01980	up
LOC_Os01g15740	up
LOC_Os02g02330	up
LOC_Os01g15830	down	OsPOX1|ddOs319
LOC_Os01g15840	up
LOC_Os02g02970	down
LOC_Os01g15860	up
LOC_Os02g03280	down	OsBI-1
LOC_Os02g03310	up
LOC_Os02g03840	down
LOC_Os01g15910	up
LOC_Os02g03970	down
LOC_Os02g04020	up
LOC_Os02g04060	down
LOC_Os02g04725	down
LOC_Os02g04840	down	CAP1
LOC_Os02g05030	down
LOC_Os02g05440	up
LOC_Os02g05365	up
LOC_Os01g16130	up
LOC_Os01g16130	down
LOC_Os02g06190	down
LOC_Os02g06010	down
LOC_Os02g06030	down
LOC_Os02g06090	down
LOC_Os02g06280	up
LOC_Os02g06330	up
LOC_Os02g06570	down
LOC_Os01g16200	up
LOC_Os02g06605	down
LOC_Os02g06640	down	rubq2
LOC_Os02g06754	down
LOC_Os02g06760	down
LOC_Os02g06790	down
LOC_Os02g07260	up	OsPgk2
LOC_Os02g07709	up
LOC_Os02g07720	up
LOC_Os02g08080	up
LOC_Os02g08100	down	Os4CL3
LOC_Os02g08160	down
LOC_Os01g02420	up
LOC_Os02g08260	up
LOC_Os01g16460	down
LOC_Os02g09080	up
LOC_Os02g09740	up
LOC_Os01g16600	down	OsRDN
LOC_Os02g10480	down	OsAGAP
LOC_Os02g10520	up
LOC_Os02g10700	down
LOC_Os02g12450	down
LOC_Os02g12490	down
LOC_Os02g12790	up	Cga1
LOC_Os02g12870	up
LOC_Os02g12890	down
LOC_Os02g13130	up
LOC_Os02g13160	down
LOC_Os02g11000	up
LOC_Os02g11110	up
LOC_Os02g11640	down
LOC_Os02g11670	up
LOC_Os02g12210	down
LOC_Os02g13520	up
LOC_Os02g13600	down
LOC_Os02g14059	down
LOC_Os02g14110	up
LOC_Os02g14500	down
LOC_Os02g14290	up
LOC_Os02g15160	down
LOC_Os02g15270	up
LOC_Os02g15640	up
LOC_Os02g15950	down	EP3|LP
LOC_Os02g15980	up
LOC_Os02g16450	up
LOC_Os02g16480	down
LOC_Os02g16709	up
LOC_Os02g17280	down
LOC_Os02g17330	up
LOC_Os02g17340	up
LOC_Os02g17480	up
LOC_Os02g17500	down	OsGMST1
LOC_Os02g17620	down
LOC_Os02g17920	up
LOC_Os02g18150	down
LOC_Os02g18180	down
LOC_Os02g18550	up
LOC_Os02g18830	up
LOC_Os02g19070	down
LOC_Os02g19210	down
LOC_Os02g20310	down
LOC_Os02g20780	up
LOC_Os02g20934	down
LOC_Os02g21240	up
LOC_Os02g21190	down
LOC_Os02g21260	down
LOC_Os02g21550	down
LOC_Os02g21750	down
LOC_Os02g22590	down
LOC_Os02g22750	up
LOC_Os02g23826	down
LOC_Os02g23930	down
LOC_Os02g23939	down
LOC_Os02g24330	up
LOC_Os02g24390	down
LOC_Os01g18230	down
LOC_Os02g25020	up
LOC_Os01g18240	up	MYB61|OsMYB61
LOC_Os01g18310	down
LOC_Os02g26470	up
LOC_Os02g26790	down
LOC_Os02g26794	down
LOC_Os02g27100	down
LOC_Os02g27170	up
LOC_Os01g18390	down
LOC_Os01g18410	up
LOC_Os02g29300	down
LOC_Os02g29340	down
LOC_Os02g29180	up
LOC_Os02g29590	up
LOC_Os02g29890	up
LOC_Os02g30050	up
LOC_Os02g30114	down
LOC_Os02g30410	down
LOC_Os01g18850	up
LOC_Os02g30910	up	OsSWEET15
LOC_Os02g31140	down	CFL1
LOC_Os02g31850	down
LOC_Os02g31867	down
LOC_Os02g31890	down
LOC_Os02g32210	up
LOC_Os02g32350	down	OsTudor-SN
LOC_Os02g32750	up
LOC_Os02g33250	up
LOC_Os02g33580	down
LOC_Os01g02600	down
LOC_Os01g19270	down
LOC_Os02g33780	down
LOC_Os02g33840	down
LOC_Os02g34120	up
LOC_Os02g34190	down
LOC_Os02g34220	down
LOC_Os01g19320	down
LOC_Os02g34410	down
LOC_Os02g34600	down	SAPK6|OSRK1
LOC_Os01g19330	down
LOC_Os02g35090	up
LOC_Os02g35220	up
LOC_Os01g02610	down
LOC_Os01g19400	up
LOC_Os02g35690	up
LOC_Os02g36070	down	CYP76M8
LOC_Os02g36220	up	OsKSL5
LOC_Os02g36350	down
LOC_Os02g36590	up
LOC_Os02g36690	down
LOC_Os02g36890	down
LOC_Os02g36924	up	OsMADS27
LOC_Os02g36940	down
LOC_Os02g37030	down
LOC_Os02g37080	up
LOC_Os02g37150	down
LOC_Os02g37290	up
LOC_Os02g37300	up
LOC_Os02g37930	down
LOC_Os02g38300	down
LOC_Os02g38860	down
LOC_Os02g38890	down
LOC_Os01g19630	down
LOC_Os02g39000	up
LOC_Os02g39070	down
LOC_Os02g39130	up
LOC_Os02g39140	up
LOC_Os02g39360	up
LOC_Os02g39384	up
LOC_Os02g39570	up
LOC_Os02g39580	up
LOC_Os02g38490	down
LOC_Os02g38690	down
LOC_Os02g38580	down
LOC_Os02g38494	down
LOC_Os02g38680	down
LOC_Os02g38780	down
LOC_Os02g38574	down
LOC_Os02g38710	down
LOC_Os02g38804	down
LOC_Os02g38800	down
LOC_Os02g39750	down
LOC_Os01g02710	down
LOC_Os02g40010	down
LOC_Os02g40320	down
LOC_Os02g40280	down
LOC_Os02g40340	down
LOC_Os02g40860	up	hbd2|OsCKI1
LOC_Os02g40870	up
LOC_Os02g41450	down
LOC_Os01g19990	up
LOC_Os02g41560	down
LOC_Os02g41760	up
LOC_Os02g41770	up
LOC_Os02g41910	up
LOC_Os02g41900	down
LOC_Os02g41880	down
LOC_Os02g41904	down	OsDEF7|CAL1|OsAFP1
LOC_Os02g41954	down
LOC_Os02g42210	up
LOC_Os02g42350	down
LOC_Os02g42520	down
LOC_Os02g42530	down
LOC_Os02g42710	down
LOC_Os02g42890	up
LOC_Os01g20730	up
LOC_Os02g43050	down
LOC_Os02g43230	down
LOC_Os02g43330	down	OsHOX24
LOC_Os02g43470	up	OsGDH3
LOC_Os02g43480	down
LOC_Os01g02730	down
LOC_Os01g20780	down
LOC_Os02g43620	up
LOC_Os02g43770	down
LOC_Os02g43900	up
LOC_Os02g44710	up
LOC_Os02g44810	down
LOC_Os01g21034	down
LOC_Os02g45530	up
LOC_Os02g45670	down
LOC_Os02g45760	up
LOC_Os02g46100	up
LOC_Os02g46220	up
LOC_Os02g46380	down
LOC_Os02g46473	up
LOC_Os02g46600	down
LOC_Os02g46910	down
LOC_Os01g21180	down
LOC_Os02g47150	down
LOC_Os02g47350	up
LOC_Os02g48080	down
LOC_Os02g48600	up
LOC_Os02g48680	up
LOC_Os02g48870	down
LOC_Os01g21560	up
LOC_Os02g49230	down	DTH2|OsCOL9|OsCCT08
LOC_Os02g49610	down
LOC_Os02g49770	down
LOC_Os02g50010	up
LOC_Os02g50130	up
LOC_Os02g50210	up
LOC_Os02g50220	up
LOC_Os02g50350	down	OsDHODH1
LOC_Os02g50404	down
LOC_Os02g50630	up
LOC_Os02g50700	down
LOC_Os02g50690	down
LOC_Os02g50900	down
LOC_Os02g50930	up	OsBIRF1
LOC_Os02g50940	up
LOC_Os02g51020	up
LOC_Os02g51060	down
LOC_Os02g51090	up
LOC_Os02g51180	down	OsCUL3a
LOC_Os01g21940	up
LOC_Os02g51620	down
LOC_Os02g51670	down
LOC_Os02g51670	up
LOC_Os02g51880	up
LOC_Os02g51930	down
LOC_Os02g52840	down	FLS
LOC_Os02g52930	down
LOC_Os02g53050	up
LOC_Os02g54870	up
LOC_Os02g55510	up
LOC_Os02g55870	down
LOC_Os02g55890	down	OVP3
LOC_Os02g55670	up
LOC_Os02g55720	up
LOC_Os02g55770	up
LOC_Os02g55710	up
LOC_Os02g55689	up
LOC_Os02g55729	up
LOC_Os02g56100	up	RNRL2
LOC_Os01g22540	up
LOC_Os02g56300	down
LOC_Os02g56550	up
LOC_Os02g56600	down
LOC_Os02g56840	up
LOC_Os02g57200	down
LOC_Os02g57350	down
LOC_Os02g57290	down	CYP97A4
LOC_Os02g57460	up
LOC_Os02g57800	up
LOC_Os02g58010	down
LOC_Os03g01180	up
LOC_Os03g01365	down
LOC_Os03g01420	down
LOC_Os03g01880	down
LOC_Os03g01920	up
LOC_Os03g01920	up
LOC_Os03g02070	up
LOC_Os01g23740	up
LOC_Os03g02170	up
LOC_Os01g23750	up
LOC_Os03g02514	down
LOC_Os01g23760	up
LOC_Os03g02670	up
LOC_Os03g02690	up
LOC_Os03g02710	up
LOC_Os03g03080	up
LOC_Os03g03360	up
LOC_Os03g03450	down
LOC_Os03g03640	down
LOC_Os01g24070	down
LOC_Os03g04020	down	EXPLA1
LOC_Os03g04070	up	ONAC022
LOC_Os03g04140	down
LOC_Os03g04220	down
LOC_Os03g04490	up
LOC_Os03g04710	down
LOC_Os03g04740	down
LOC_Os03g05334	down	OsIPS1
LOC_Os03g05480	down
LOC_Os03g05550	down
LOC_Os01g24490	down
LOC_Os01g24470	down
LOC_Os03g06520	down
LOC_Os03g06700	up
LOC_Os03g06705	up
LOC_Os01g24710	down	OsSalT|OsMBL1
LOC_Os03g06835	down
LOC_Os03g06840	down
LOC_Os03g06970	up
LOC_Os03g07110	up
LOC_Os03g07270	up
LOC_Os03g07250	up	CYP704B2
LOC_Os03g07340	up
LOC_Os03g07400	down
LOC_Os03g07410	down
LOC_Os03g07370	up
LOC_Os03g07360	up	OsDof12|OsCDF1
LOC_Os03g07570	down
LOC_Os03g08080	up
LOC_Os03g08250	up
LOC_Os01g24940	up
LOC_Os03g08800	up
LOC_Os03g09170	up
LOC_Os03g10240	up
LOC_Os01g25320	up
LOC_Os03g10478	up
LOC_Os03g10640	down
LOC_Os03g10740	up
LOC_Os03g11080	up
LOC_Os03g11220	up
LOC_Os03g11270	up
LOC_Os03g11420	up	Os3BGlu6
LOC_Os03g11660	up
LOC_Os03g11780	up
LOC_Os01g25770	up
LOC_Os01g25770	up
LOC_Os03g12560	up
LOC_Os03g12590	down
LOC_Os01g25920	up
LOC_Os03g12810	up
LOC_Os03g12930	down
LOC_Os03g13040	up
LOC_Os03g13100	up
LOC_Os03g13230	down
LOC_Os01g26000	up
LOC_Os03g13690	up
LOC_Os03g14280	down
LOC_Os03g14520	down
LOC_Os03g14690	up
LOC_Os03g14790	up
LOC_Os03g14915	up
LOC_Os03g15320	up
LOC_Os03g15340	down
LOC_Os03g15380	up
LOC_Os03g15740	down
LOC_Os03g16160	up
LOC_Os03g16718	up
LOC_Os03g16824	up
LOC_Os03g16950	down	OsDUF26|OsCRRSP55
LOC_Os03g17270	up
LOC_Os03g17890	down
LOC_Os03g18130	down	OsASN1|OsAS1
LOC_Os03g18220	up	OsPDC2
LOC_Os01g27340	down
LOC_Os03g18640	down
LOC_Os03g18850	down	JIOsPR10|OsPR10
LOC_Os03g18890	down
LOC_Os03g18990	up
LOC_Os03g19240	down
LOC_Os01g27700	down
LOC_Os03g19500	up
LOC_Os03g20470	down
LOC_Os03g20500	up
LOC_Os03g20630	up
LOC_Os03g20570	up
LOC_Os03g20700	down	OsCHLH
LOC_Os03g21130	down
LOC_Os03g21630	up
LOC_Os03g21964	down
LOC_Os03g22250	up
LOC_Os03g24300	up
LOC_Os03g25390	up	OsNPSN12
LOC_Os03g25410	up
LOC_Os03g26044	down
LOC_Os03g26120	down
LOC_Os03g26229	up
LOC_Os03g26420	up
LOC_Os03g26500	down
LOC_Os01g29240	up
LOC_Os03g26920	up
LOC_Os03g26930	up
LOC_Os03g27460	up
LOC_Os03g27610	up	OsMATL
LOC_Os01g29507	up
LOC_Os03g28250	down
LOC_Os03g28400	up
LOC_Os03g29240	down
LOC_Os03g29630	down	OsELS2
LOC_Os03g29830	down
LOC_Os03g30590	up
LOC_Os03g30610	down
LOC_Os03g30740	down
LOC_Os01g29780	up
LOC_Os03g31320	down
LOC_Os03g31760	down
LOC_Os03g32160	up
LOC_Os03g32330	down
LOC_Os03g32499	up
LOC_Os03g32560	up
LOC_Os03g32630	up
LOC_Os03g32636	up
LOC_Os03g35950	down
LOC_Os03g36080	down
LOC_Os03g36534	up
LOC_Os03g37240	up
LOC_Os03g38359	up
LOC_Os03g38590	down
LOC_Os03g38920	up
LOC_Os03g39040	down
LOC_Os03g39110	down
LOC_Os03g39660	down
LOC_Os03g39720	up
LOC_Os03g39860	down
LOC_Os03g40060	up
LOC_Os03g40110	up
LOC_Os03g40180	down
LOC_Os03g40580	up
LOC_Os03g40860	up
LOC_Os03g40830	up
LOC_Os03g41060	up	GASR2
LOC_Os03g41080	up
LOC_Os03g41200	up
LOC_Os03g42070	down
LOC_Os03g42130	down
LOC_Os01g31980	down
LOC_Os01g32080	down
LOC_Os03g43524	down
LOC_Os03g43670	down	OsCR4
LOC_Os03g43880	down
LOC_Os03g44180	down
LOC_Os03g44260	up
LOC_Os03g44450	down
LOC_Os03g45280	down
LOC_Os01g32460	down	RH2
LOC_Os03g46660	down
LOC_Os03g46770	up
LOC_Os03g46910	up
LOC_Os01g32640	down
LOC_Os03g47574	up
LOC_Os03g47670	up
LOC_Os01g32670	down
LOC_Os03g47749	up
LOC_Os03g48190	down
LOC_Os03g48170	up	FLO6
LOC_Os03g48904	up
LOC_Os03g48950	up
LOC_Os03g50100	up
LOC_Os03g50280	up
LOC_Os03g50364	down
LOC_Os01g04050	down	IAI2
LOC_Os03g50480	down
LOC_Os03g50540	up
LOC_Os03g50520	up
LOC_Os03g50560	down	PIBP1
LOC_Os03g50590	down
LOC_Os03g50800	down
LOC_Os03g51100	up
LOC_Os03g51260	up
LOC_Os03g51479	up
LOC_Os03g51970	down	OsGRF6
LOC_Os03g52140	down
LOC_Os03g52680	up
LOC_Os03g53440	down
LOC_Os03g53580	down
LOC_Os03g53770	down
LOC_Os01g33514	down
LOC_Os01g33684	down
LOC_Os01g33710	down
LOC_Os01g33710	up
LOC_Os03g55420	down
LOC_Os01g33720	up
LOC_Os03g55645	up
LOC_Os03g55660	up
LOC_Os03g55670	up
LOC_Os01g33760	down
LOC_Os03g55874	up
LOC_Os03g55874	down
LOC_Os03g55920	down
LOC_Os03g56100	up
LOC_Os03g56080	up
LOC_Os03g56250	down
LOC_Os03g56280	up
LOC_Os03g56590	up
LOC_Os03g56790	up	OsADF2
LOC_Os03g57160	down
LOC_Os03g57450	up	OsCPK10
LOC_Os03g57430	down
LOC_Os03g57425	down
LOC_Os03g57500	down
LOC_Os03g57640	up
LOC_Os03g57690	down
LOC_Os03g57990	up
LOC_Os03g58150	down
LOC_Os03g58290	up
LOC_Os03g58300	down	OsIGL|OsIgl
LOC_Os03g58320	down
LOC_Os03g58800	down
LOC_Os03g59200	up
LOC_Os03g59225	down
LOC_Os03g59460	up
LOC_Os03g59880	down
LOC_Os03g60000	up
LOC_Os03g60780	down
LOC_Os03g60840	down
LOC_Os03g60960	up
LOC_Os03g61040	up
LOC_Os03g61150	down
LOC_Os03g61200	down	OsSPX4
LOC_Os03g61260	down
LOC_Os03g61280	down
LOC_Os03g61670	down	CRT
LOC_Os03g61930	up	OsACBP6
LOC_Os03g62240	down
LOC_Os03g62620	down
LOC_Os03g62740	up
LOC_Os03g63010	down	PTOX1
LOC_Os03g63140	down
LOC_Os03g63350	down
LOC_Os03g63430	up
LOC_Os01g35330	down
LOC_Os03g63750	up
LOC_Os03g63740	up
LOC_Os03g63870	down
LOC_Os04g01140	down	CYP93G1|OsFNSII
LOC_Os04g01540	down
LOC_Os04g01600	up
LOC_Os04g01674	down
LOC_Os04g01690	down	ADCa|OsAdc2
LOC_Os04g01740	up
LOC_Os04g01960	up
LOC_Os04g02050	down
LOC_Os04g02060	down
LOC_Os04g02450	up
LOC_Os04g02470	up
LOC_Os04g02450	up
LOC_Os04g03860	up
LOC_Os04g04740	down
LOC_Os04g05050	down
LOC_Os04g05060	up
LOC_Os04g06280	down
LOC_Os04g06350	down
LOC_Os04g06520	up
LOC_Os04g06520	down
LOC_Os04g06850	down
LOC_Os04g07030	up
LOC_Os04g08180	up
LOC_Os04g08410	down
LOC_Os04g08800	down
LOC_Os04g09350	down
LOC_Os04g09540	down
LOC_Os04g09720	down
LOC_Os01g36100	up
LOC_Os04g09810	down
LOC_Os04g10350	down
LOC_Os04g10490	down
LOC_Os04g11570	down
LOC_Os04g11956	up
LOC_Os04g12550	up
LOC_Os04g12830	down
LOC_Os04g14020	up
LOC_Os04g14810	up
LOC_Os04g16270	up
LOC_Os04g17064	down
LOC_Os04g17100	down
LOC_Os04g17330	up
LOC_Os04g18380	down
LOC_Os04g18790	up
LOC_Os04g20330	up	OscZOG1
LOC_Os04g20360	up
LOC_Os04g20400	up
LOC_Os04g20410	up
LOC_Os04g21740	down
LOC_Os04g21950	down	OsWRKY51
LOC_Os04g22270	down
LOC_Os04g22380	up
LOC_Os01g37000	down
LOC_Os04g23180	up
LOC_Os04g23590	up
LOC_Os04g23700	up
LOC_Os04g24770	up
LOC_Os04g25230	up
LOC_Os04g25784	up
LOC_Os04g26330	down
LOC_Os04g26590	up
LOC_Os04g27670	down
LOC_Os04g27800	up
LOC_Os04g28040	down
LOC_Os04g28090	up
LOC_Os04g28990	up
LOC_Os01g37370	up
LOC_Os04g30030	down
LOC_Os04g30180	up
LOC_Os04g30230	up
LOC_Os04g30470	down
LOC_Os04g31010	up
LOC_Os01g37500	down
LOC_Os04g31630	down
LOC_Os04g31804	down
LOC_Os04g31790	down
LOC_Os04g31960	down
LOC_Os04g32270	down
LOC_Os04g32350	down	OsRPC53
LOC_Os04g32480	up
LOC_Os04g32790	up
LOC_Os04g32930	down	OsSnm1
LOC_Os04g32960	up
LOC_Os04g33110	down
LOC_Os04g33150	up
LOC_Os04g33310	up
LOC_Os04g33670	up
LOC_Os04g33720	down	OSINV4
LOC_Os04g33740	down	GIF1|OsCIN2|OsGIF1|WB1
LOC_Os04g33880	down
LOC_Os04g33990	down
LOC_Os04g34140	up
LOC_Os04g34180	up
LOC_Os04g34950	up
LOC_Os04g35114	up
LOC_Os04g35130	down
LOC_Os04g35290	down
LOC_Os04g35530	down
LOC_Os04g35890	down
LOC_Os01g38180	down
LOC_Os04g36790	up
LOC_Os04g36910	down
LOC_Os04g37440	up
LOC_Os04g37470	up
LOC_Os04g38026	down
LOC_Os04g38410	down	CP24
LOC_Os04g38420	down
LOC_Os04g38720	down	OsNAC2|OsTIL1|OMTN2|OsORE1
LOC_Os04g39040	down
LOC_Os04g39489	up
LOC_Os04g39840	up	Os4BGlu10
LOC_Os04g40490	up
LOC_Os04g41238	up
LOC_Os04g42090	down	OsSAMDC
LOC_Os04g42320	down
LOC_Os04g42540	down
LOC_Os04g42770	down
LOC_Os04g43300	up
LOC_Os04g43350	up
LOC_Os04g43650	down
LOC_Os01g04409	down
LOC_Os04g44320	down	OsYSL12
LOC_Os04g44330	up
LOC_Os04g44410	up
LOC_Os04g44530	up
LOC_Os04g44550	down
LOC_Os04g44690	down
LOC_Os04g44780	down
LOC_Os04g44900	down
LOC_Os04g45650	up
LOC_Os04g45720	down
LOC_Os04g46280	down
LOC_Os04g46300	down
LOC_Os04g46444	down
LOC_Os04g46960	down	OsGPX1
LOC_Os01g04460	down
LOC_Os04g47180	down
LOC_Os04g47300	down	OsCPK12
LOC_Os04g47520	down
LOC_Os04g47720	down
LOC_Os04g47890	up
LOC_Os04g48170	down	CYP87A3
LOC_Os04g48200	down
LOC_Os04g48210	up
LOC_Os04g48830	up
LOC_Os04g48840	up
LOC_Os04g49280	down
LOC_Os04g49550	up
LOC_Os04g49510	down	OsCDPK7
LOC_Os04g49520	down
LOC_Os04g49685	down
LOC_Os04g49748	down
LOC_Os04g50020	down
LOC_Os04g50176	up
LOC_Os04g50670	down
LOC_Os01g40120	down
LOC_Os04g51350	down	MPR25
LOC_Os04g51480	down
LOC_Os04g52140	up	OsCTR3
LOC_Os04g52320	up
LOC_Os04g52440	down
LOC_Os04g52450	down	Osl2
LOC_Os04g52660	down
LOC_Os04g52630	down
LOC_Os04g52830	down	Ctb1
LOC_Os04g52840	down
LOC_Os04g52940	down
LOC_Os04g53190	down
LOC_Os04g53490	up
LOC_Os04g53520	down
LOC_Os04g53496	down
LOC_Os04g53670	down
LOC_Os04g53998	down
LOC_Os04g54070	up
LOC_Os04g54390	up
LOC_Os04g54240	down
LOC_Os04g54630	up
LOC_Os04g55410	down
LOC_Os04g55500	up
LOC_Os04g55550	up
LOC_Os01g40650	down
LOC_Os01g40660	down
LOC_Os04g55700	up
LOC_Os04g56160	down
LOC_Os04g56230	up
LOC_Os04g56350	up
LOC_Os01g40750	down
LOC_Os04g56680	up
LOC_Os04g57160	up
LOC_Os04g57870	up
LOC_Os04g58020	down
LOC_Os01g41120	up
LOC_Os04g58190	down	OsDOF18
LOC_Os04g58280	down
LOC_Os04g58560	down	OsAtg4
LOC_Os04g58860	down	OsNDR1
LOC_Os04g59010	up
LOC_Os04g59050	down
LOC_Os04g59150	down
LOC_Os04g59260	down
LOC_Os04g59300	down
LOC_Os04g59340	up
LOC_Os04g59380	down
LOC_Os05g01100	up
LOC_Os05g01180	up
LOC_Os01g41430	down	RUGT-5
LOC_Os01g41530	up
LOC_Os05g01950	up
LOC_Os01g41565	up
LOC_Os05g02770	down
LOC_Os01g41710	down	CAB2R
LOC_Os05g03620	down
LOC_Os05g03780	down	OZT1|OsMTP1
LOC_Os05g04070	up
LOC_Os05g04215	up
LOC_Os05g04380	down
LOC_Os05g04470	down
LOC_Os05g05320	down
LOC_Os05g05700	down
LOC_Os05g06014	up
LOC_Os05g06130	down
LOC_Os05g06160	down
LOC_Os05g06490	up
LOC_Os05g06530	down
LOC_Os05g06680	up
LOC_Os05g06750	down
LOC_Os05g06970	up
LOC_Os05g06990	down
LOC_Os05g07120	down
LOC_Os05g07730	up
LOC_Os05g07940	down
LOC_Os05g08460	down
LOC_Os01g42140	down
LOC_Os05g08910	up
LOC_Os05g09740	up
LOC_Os05g10414	down
LOC_Os05g10420	up
LOC_Os05g10440	up
LOC_Os05g10480	up
LOC_Os05g10570	down
LOC_Os05g10625	up
LOC_Os05g11570	up
LOC_Os05g11630	up
LOC_Os05g11840	up
LOC_Os05g12481	up
LOC_Os05g14260	up
LOC_Os05g14310	down
LOC_Os05g14580	up
LOC_Os05g14980	up
LOC_Os01g42500	down
LOC_Os05g15600	up
LOC_Os05g16740	down
LOC_Os05g16824	down
LOC_Os05g18446	up
LOC_Os05g18274	down
LOC_Os05g18950	up
LOC_Os01g42720	down
LOC_Os05g19670	up
LOC_Os05g20304	up
LOC_Os05g20630	up
LOC_Os05g20660	up
LOC_Os05g22724	up
LOC_Os01g42770	down
LOC_Os05g22930	up
LOC_Os05g23140	up
LOC_Os05g23200	up
LOC_Os01g42810	up
LOC_Os05g23610	down
LOC_Os05g24650	down
LOC_Os05g25260	up
LOC_Os05g25390	down
LOC_Os05g25850	up	OsMSD
LOC_Os05g25974	down
LOC_Os05g26194	up
LOC_Os05g26359	up
LOC_Os05g27660	down
LOC_Os05g27800	up
LOC_Os05g27960	down
LOC_Os05g27100	up
LOC_Os05g28180	down
LOC_Os05g28210	down	OsEm|EMP1|OsEm1
LOC_Os05g28290	down
LOC_Os05g29750	down
LOC_Os05g30030	up
LOC_Os05g30190	up
LOC_Os05g30730	down
LOC_Os05g31670	up	OsPM19L1|OsPM1
LOC_Os05g32360	down
LOC_Os05g32380	down
LOC_Os05g32710	up	OsISA2
LOC_Os05g32730	up
LOC_Os05g33290	down
LOC_Os05g33300	up
LOC_Os05g33500	up
LOC_Os05g33550	down
LOC_Os05g33630	down
LOC_Os05g33680	down
LOC_Os05g33940	up	HSR203J
LOC_Os05g34220	up
LOC_Os05g34210	down
LOC_Os05g34240	down
LOC_Os01g43480	down
LOC_Os05g34800	down
LOC_Os05g34830	up	OsNAC52
LOC_Os05g34980	down
LOC_Os05g35150	down
LOC_Os05g35380	up
LOC_Os05g35360	up
LOC_Os05g35444	up
LOC_Os05g35730	up
LOC_Os05g36160	up
LOC_Os01g43610	down	OsOFP2
LOC_Os05g36260	down
LOC_Os05g36270	down	OscFBP2
LOC_Os05g36340	down
LOC_Os05g37650	up
LOC_Os05g38000	up	OsRopGEF10|BGL
LOC_Os05g38210	up
LOC_Os05g38219	down
LOC_Os05g38390	down	OsLAC13
LOC_Os05g38630	down
LOC_Os05g38640	down
LOC_Os05g38710	down
LOC_Os05g38810	down
LOC_Os05g39310	up	OsPDC1
LOC_Os05g40160	up
LOC_Os01g43990	down
LOC_Os05g40530	up
LOC_Os05g40810	up
LOC_Os05g40920	up
LOC_Os05g40900	down
LOC_Os05g41080	up	CENH3
LOC_Os01g44100	up
LOC_Os05g41270	up
LOC_Os01g44120	up
LOC_Os05g41530	up
LOC_Os05g41550	up
LOC_Os01g44180	down
LOC_Os05g42160	down
LOC_Os05g42200	up
LOC_Os05g42210	down
LOC_Os05g42270	down
LOC_Os05g42424	down
LOC_Os05g42980	up
LOC_Os05g43380	down	OsCPP5
LOC_Os05g43680	up
LOC_Os05g43930	up
LOC_Os05g44060	up
LOC_Os05g44180	up	OsFTL10
LOC_Os05g44300	up
LOC_Os05g44770	up
LOC_Os05g44930	down
LOC_Os05g45080	up
LOC_Os05g45660	up
LOC_Os05g45700	down
LOC_Os05g45880	down
LOC_Os05g45940	down
LOC_Os01g44990	down
LOC_Os01g45040	up
LOC_Os01g03050	down
LOC_Os05g46845	down
LOC_Os05g47540	up	OsPEAMT2
LOC_Os05g47650	up
LOC_Os05g47690	down
LOC_Os01g45200	down	Snl6
LOC_Os01g45250	down
LOC_Os05g48040	down	OsMATE2
LOC_Os05g48650	up
LOC_Os05g48810	up
LOC_Os05g48900	down
LOC_Os05g48930	down
LOC_Os05g49080	down
LOC_Os05g49150	up
LOC_Os05g49230	down
LOC_Os01g03070	down
LOC_Os01g45439	down
LOC_Os05g49500	up
LOC_Os05g49510	down
LOC_Os05g49530	up
LOC_Os05g49630	down
LOC_Os01g45460	up
LOC_Os05g49810	up
LOC_Os05g49880	up
LOC_Os05g50060	up
LOC_Os01g45550	up	OsPIN3t
LOC_Os05g50300	down
LOC_Os05g50330	down
LOC_Os05g50330	down
LOC_Os01g45640	down
LOC_Os05g50560	up	OsMPK9
LOC_Os05g50570	up
LOC_Os05g50600	up
LOC_Os05g50650	down
LOC_Os01g45624	up
LOC_Os05g51050	down
LOC_Os05g51510	up	OsABIL2
LOC_Os06g01720	up
LOC_Os01g45914	down
LOC_Os06g02144	up	Os6PGDH
LOC_Os06g02260	down
LOC_Os06g02590	down
LOC_Os01g46020	down
LOC_Os06g03560	up
LOC_Os06g03700	up
LOC_Os06g03820	up
LOC_Os06g04120	up
LOC_Os06g04240	up
LOC_Os06g04290	up
LOC_Os01g46169	up
LOC_Os01g03110	down
LOC_Os06g04610	up
LOC_Os06g04620	up
LOC_Os06g04830	down
LOC_Os06g04930	down
LOC_Os06g05020	down
LOC_Os06g05190	down	OsXRCC1
LOC_Os06g05355	down
LOC_Os06g05420	up
LOC_Os06g05424	down
LOC_Os06g05470	down
LOC_Os06g05620	up
LOC_Os06g05730	up
LOC_Os06g06160	down
LOC_Os06g07160	down
LOC_Os06g07240	up
LOC_Os06g07430	up
LOC_Os06g07590	down
LOC_Os06g07600	down
LOC_Os06g07620	up
LOC_Os06g08890	down
LOC_Os06g08884	down
LOC_Os06g09230	down
LOC_Os06g09660	up	OsARF16
LOC_Os06g09820	up
LOC_Os06g09950	down
LOC_Os06g10130	up
LOC_Os06g10170	down
LOC_Os06g10355	up
LOC_Os06g10730	down
LOC_Os06g10750	down
LOC_Os06g11010	down	S5(ORF5)
LOC_Os06g11140	up
LOC_Os06g11230	up
LOC_Os06g11420	up
LOC_Os06g11840	down	OsTPP2
LOC_Os06g12210	up	BU1|OsbHLH174
LOC_Os06g12170	down
LOC_Os06g12450	up	ALK|SSIIa
LOC_Os06g12630	up	OsDHAR2
LOC_Os06g12730	down
LOC_Os06g12930	up
LOC_Os06g12940	up
LOC_Os06g13210	down
LOC_Os06g13420	up
LOC_Os06g14220	down
LOC_Os06g14324	down
LOC_Os01g47490	up
LOC_Os06g14440	up
LOC_Os06g14870	down
LOC_Os06g15390	down
LOC_Os06g15560	down
LOC_Os06g16270	down	OsHSBP2
LOC_Os06g16420	down
LOC_Os06g17130	up
LOC_Os06g17540	up
LOC_Os06g18000	down
LOC_Os06g18150	up
LOC_Os06g18670	down
LOC_Os06g19220	up
LOC_Os06g19444	down
LOC_Os06g19650	up
LOC_Os01g47700	up
LOC_Os06g20050	up
LOC_Os06g20879	down
LOC_Os06g21120	up
LOC_Os06g21369	down
LOC_Os06g21390	up	MKRN
LOC_Os06g21600	up
LOC_Os06g21620	up
LOC_Os06g22000	up
LOC_Os06g22400	up
LOC_Os06g22960	down
LOC_Os06g22919	down
LOC_Os01g47930	up
LOC_Os06g23440	down
LOC_Os06g23540	up
LOC_Os06g23590	down
LOC_Os06g23600	down
LOC_Os06g23870	down
LOC_Os06g24240	down
LOC_Os06g24730	down	NYC3
LOC_Os06g24910	down
LOC_Os06g24920	down
LOC_Os06g25010	up
LOC_Os06g25930	up
LOC_Os06g25500	up
LOC_Os01g48120	up
LOC_Os06g27860	down
LOC_Os06g27900	down
LOC_Os06g28124	down
LOC_Os06g28240	up
LOC_Os06g28970	up
LOC_Os06g29490	up
LOC_Os06g29770	up
LOC_Os06g29810	down	OsPK10|Pid2
LOC_Os06g31220	down
LOC_Os06g31220	down
LOC_Os06g32590	up
LOC_Os06g32840	up
LOC_Os01g48420	down
LOC_Os06g34120	down
LOC_Os06g34780	up
LOC_Os06g34810	up
LOC_Os06g34830	up
LOC_Os06g35030	down
LOC_Os06g35050	up
LOC_Os06g35160	down
LOC_Os06g35500	up
LOC_Os06g35520	down
LOC_Os06g36520	up
LOC_Os06g36560	down	OsMIOX
LOC_Os06g37130	down
LOC_Os06g37440	down
LOC_Os06g37450	up
LOC_Os06g37510	down
LOC_Os06g38210	down
LOC_Os06g38320	down
LOC_Os06g38650	down
LOC_Os06g38710	up
LOC_Os06g38730	down
LOC_Os06g38940	down
LOC_Os06g38780	down
LOC_Os06g38980	up
LOC_Os01g48910	up
LOC_Os06g39130	down
LOC_Os01g48920	up	OsATG6a
LOC_Os06g39970	up
LOC_Os06g40550	up	OsABCG15
LOC_Os01g49026	down
LOC_Os06g40840	down
LOC_Os06g41010	down	OsiSAP8
LOC_Os06g41120	down
LOC_Os06g41360	down
LOC_Os06g41540	down
LOC_Os06g41840	up
LOC_Os06g42110	up
LOC_Os06g42440	up
LOC_Os06g42430	down
LOC_Os06g42490	down
LOC_Os06g42490	down
LOC_Os06g42560	down
LOC_Os06g43590	up
LOC_Os06g43640	down	OsSAP1|OsPAP26
LOC_Os06g43770	down
LOC_Os06g44034	down	SDT
LOC_Os06g44040	down
LOC_Os06g44060	down
LOC_Os06g44160	down
LOC_Os01g49280	down
LOC_Os06g44420	down
LOC_Os06g44620	down	Os4CL4
LOC_Os06g45020	down
LOC_Os06g45110	down
LOC_Os01g03350	up
LOC_Os01g03330	up
LOC_Os01g03340	up
LOC_Os01g49370	down
LOC_Os06g45390	down
LOC_Os06g45610	up
LOC_Os06g45640	up
LOC_Os06g46340	down
LOC_Os06g46440	down
LOC_Os06g46550	up
LOC_Os06g46770	up
LOC_Os06g46770	up
LOC_Os06g46995	down
LOC_Os06g47390	up
LOC_Os06g47520	down
LOC_Os06g47590	up
LOC_Os06g47650	up	OsLRR-RLK1
LOC_Os06g47570	down
LOC_Os06g47930	up
LOC_Os06g48060	up	STAR1
LOC_Os06g49010	down
LOC_Os06g49410	down
LOC_Os06g49700	down
LOC_Os06g49760	up
LOC_Os06g49810	down
LOC_Os06g49850	up
LOC_Os06g49890	down
LOC_Os06g49920	down
LOC_Os06g49930	down
LOC_Os06g50220	up
LOC_Os06g50450	up
LOC_Os06g50450	up
LOC_Os06g50580	up
LOC_Os06g50590	up
LOC_Os06g50724	down
LOC_Os06g50715	down
LOC_Os06g51050	down	Cht-3
LOC_Os06g51060	down	RC24
LOC_Os06g51100	down
LOC_Os06g51240	up
LOC_Os06g51500	up
LOC_Os07g01540	down
LOC_Os07g01680	up
LOC_Os07g01880	up
LOC_Os07g01890	up
LOC_Os07g01960	up
LOC_Os07g02360	down
LOC_Os07g02460	up
LOC_Os07g03030	down
LOC_Os07g03120	down
LOC_Os07g03160	up
LOC_Os07g03730	up
LOC_Os07g03890	up
LOC_Os07g04330	down
LOC_Os07g04440	down
LOC_Os01g50290	down
LOC_Os07g04990	up
LOC_Os01g50310	up
LOC_Os07g05290	down
LOC_Os01g03410	down
LOC_Os07g05710	up
LOC_Os07g06490	up
LOC_Os07g06530	down
LOC_Os07g06430	down
LOC_Os07g06710	down
LOC_Os07g06990	up
LOC_Os07g07080	down
LOC_Os07g08090	up
LOC_Os07g08300	up
LOC_Os01g50750	up
LOC_Os07g08710	up
LOC_Os07g08520	up
LOC_Os07g09420	up
LOC_Os07g09540	up
LOC_Os07g09630	down
LOC_Os07g09680	down
LOC_Os07g09890	down
LOC_Os01g50849	up
LOC_Os07g10150	down
LOC_Os07g10360	up
LOC_Os07g10600	down	Ossmt1-1
LOC_Os07g10880	up
LOC_Os01g50940	down	OsOsbHLH010|OsMYL1
LOC_Os07g12510	down
LOC_Os01g03480	up
LOC_Os07g12640	up
LOC_Os07g12910	down
LOC_Os07g13230	up
LOC_Os07g13490	up
LOC_Os07g13520	down
LOC_Os07g14514	up
LOC_Os07g14860	up
LOC_Os07g14890	down
LOC_Os07g14900	down
LOC_Os07g15270	up
LOC_Os07g16140	down
LOC_Os07g17230	down
LOC_Os01g51280	down
LOC_Os07g18710	up
LOC_Os07g18944	up
LOC_Os07g19410	up
LOC_Os07g20360	up
LOC_Os07g20340	up
LOC_Os07g20420	up
LOC_Os07g20544	down
LOC_Os07g23190	up
LOC_Os01g51460	up
LOC_Os07g23970	up
LOC_Os07g25050	down
LOC_Os07g25510	down
LOC_Os07g25740	down
LOC_Os07g26640	down
LOC_Os07g27340	up
LOC_Os07g27480	up
LOC_Os07g27760	down
LOC_Os07g27960	up
LOC_Os07g28930	down
LOC_Os07g29300	down
LOC_Os07g30980	up
LOC_Os07g31410	up
LOC_Os01g52120	up
LOC_Os07g31599	down
LOC_Os07g31670	up
LOC_Os01g52130	down
LOC_Os07g32761	down
LOC_Os07g33270	up
LOC_Os01g52214	down
LOC_Os07g33320	down
LOC_Os07g33540	down
LOC_Os07g33550	down
LOC_Os07g34190	down
LOC_Os07g34260	down
LOC_Os07g33921	up
LOC_Os07g33910	up	OsGPT2-3
LOC_Os07g34980	up
LOC_Os07g35160	up
LOC_Os07g35310	up
LOC_Os07g35335	up
LOC_Os07g35370	down
LOC_Os07g35390	down
LOC_Os07g35480	down
LOC_Os07g35970	down
LOC_Os07g36220	up
LOC_Os07g36210	down
LOC_Os07g36800	down
LOC_Os07g36940	up	eIF4G
LOC_Os07g37100	down	OsENT2
LOC_Os01g52594	up
LOC_Os07g37410	up
LOC_Os07g37820	up
LOC_Os01g03630	up	OsLPR3
LOC_Os07g38030	up
LOC_Os07g38230	down
LOC_Os01g52690	down
LOC_Os07g38900	up
LOC_Os07g38930	up
LOC_Os07g39030	down
LOC_Os07g39114	up
LOC_Os07g39320	down	Oshox14
LOC_Os07g39350	down
LOC_Os07g39470	up	CIGR2
LOC_Os07g39480	down	OsWRKY78
LOC_Os07g39820	up	OsSHR1
LOC_Os07g40140	down
LOC_Os07g40270	down
LOC_Os07g40580	down
LOC_Os07g40630	down
LOC_Os07g40640	down
LOC_Os01g52880	down
LOC_Os07g40910	up
LOC_Os07g41170	down
LOC_Os07g41840	down
LOC_Os07g42200	up
LOC_Os07g42324	up
LOC_Os07g43010	down	DTM1
LOC_Os07g43160	down
LOC_Os07g43970	up
LOC_Os07g44070	up
LOC_Os07g44320	up
LOC_Os01g03680	down
LOC_Os07g44620	down	Os-eIF6;1
LOC_Os07g44700	down
LOC_Os07g44970	down
LOC_Os07g46210	up
LOC_Os07g46280	down
LOC_Os07g45740	up
LOC_Os01g53280	up
LOC_Os07g46330	up
LOC_Os07g46780	down
LOC_Os07g46846	down
LOC_Os07g47040	down
LOC_Os01g53390	up
LOC_Os07g47460	down
LOC_Os07g47460	up
LOC_Os07g47670	down	OsHIGD2
LOC_Os07g47790	up
LOC_Os07g47960	up
LOC_Os07g47970	down
LOC_Os07g48520	down
LOC_Os07g48790	up
LOC_Os07g48900	up
LOC_Os07g49070	down
LOC_Os07g49150	down
LOC_Os07g49390	down	Mtr1
LOC_Os08g01350	down
LOC_Os08g01390	down
LOC_Os08g01640	up
LOC_Os08g01810	up
LOC_Os08g02360	down
LOC_Os08g02400	down
LOC_Os08g02430	up
LOC_Os08g02950	down
LOC_Os08g03350	down	OsHT|OsLHT1
LOC_Os08g03640	down	YK704
LOC_Os08g03670	down
LOC_Os08g04420	down
LOC_Os01g53810	down
LOC_Os01g53820	down
LOC_Os08g04560	up	TDC3
LOC_Os08g05320	down
LOC_Os08g05910	down	OsNRT1.1A
LOC_Os08g06090	up
LOC_Os08g06659	down
LOC_Os08g06810	down
LOC_Os01g54000	up
LOC_Os08g07350	up
LOC_Os08g07670	up
LOC_Os08g08120	down
LOC_Os08g08592	down
LOC_Os08g08970	down
LOC_Os08g09000	down
LOC_Os01g54140	up
LOC_Os08g09450	up
LOC_Os08g09870	up
LOC_Os08g10620	down
LOC_Os08g10630	down	OsZIP4
LOC_Os08g10760	up
LOC_Os08g11450	up
LOC_Os08g11720	up
LOC_Os08g12740	up
LOC_Os08g12680	up
LOC_Os08g13090	down
LOC_Os08g13310	up
LOC_Os08g13430	up
LOC_Os08g13630	down
LOC_Os08g14195	down
LOC_Os08g14350	up
LOC_Os08g13780	down
LOC_Os08g13870	up
LOC_Os08g13880	up
LOC_Os08g14364	up
LOC_Os08g14450	up	OsSIG6
LOC_Os08g15000	down
LOC_Os08g14890	down
LOC_Os08g15180	up
LOC_Os08g15230	down
LOC_Os08g15444	down
LOC_Os08g15590	down
LOC_Os08g15600	down
LOC_Os08g15650	up
LOC_Os01g54590	up
LOC_Os08g16010	down
LOC_Os08g16810	down
LOC_Os08g17080	up
LOC_Os08g19210	up
LOC_Os08g19374	down
LOC_Os08g19470	down
LOC_Os08g19910	up
LOC_Os08g20480	up
LOC_Os08g22604	down
LOC_Os08g22864	down
LOC_Os08g23280	up
LOC_Os01g54930	down
LOC_Os08g23320	up	OsPPT1
LOC_Os08g23360	down
LOC_Os08g24140	down
LOC_Os08g24250	down
LOC_Os08g24290	down
LOC_Os08g24360	down
LOC_Os08g24770	up
LOC_Os08g25010	up
LOC_Os08g25010	down
LOC_Os08g27140	up
LOC_Os08g27220	down
LOC_Os08g27759	down
LOC_Os08g27810	up
LOC_Os08g28460	up
LOC_Os08g28460	down
LOC_Os08g28580	down
LOC_Os08g28820	down
LOC_Os08g28800	down
LOC_Os08g29160	up
LOC_Os08g29500	down
LOC_Os08g29854	down
LOC_Os08g30020	down
LOC_Os08g30510	down
LOC_Os08g30810	down
LOC_Os01g55240	down	GA2OX3|OsGA2OX3
LOC_Os08g31130	up
LOC_Os08g30860	down
LOC_Os08g31460	down
LOC_Os01g55340	up
LOC_Os08g31720	up
LOC_Os08g31910	up
LOC_Os08g32310	down
LOC_Os08g32420	up
LOC_Os08g32570	up
LOC_Os08g32970	down
LOC_Os08g33020	up
LOC_Os08g33050	down
LOC_Os08g33370	up	GF14c
LOC_Os08g33620	down
LOC_Os01g55420	down
LOC_Os08g33900	up
LOC_Os08g34050	down
LOC_Os08g34500	up
LOC_Os08g34570	down
LOC_Os08g34640	down
LOC_Os08g34879	up
LOC_Os08g34879	up
LOC_Os08g35010	down
LOC_Os08g35030	down
LOC_Os08g35305	up
LOC_Os08g35939	down
LOC_Os08g35939	down
LOC_Os08g36140	up
LOC_Os08g36150	up
LOC_Os08g36170	down
LOC_Os08g36250	down
LOC_Os08g36220	down
LOC_Os08g36330	up
LOC_Os08g36630	down
LOC_Os08g36910	down	alphaAmy3|OsAmy3D|RAmy3D
LOC_Os08g37456	up
LOC_Os08g37470	up
LOC_Os08g37650	down
LOC_Os08g37660	down
LOC_Os08g38080	down
LOC_Os08g38300	up
LOC_Os08g38370	up
LOC_Os01g55860	up
LOC_Os08g38780	up	OsHAP5D
LOC_Os08g38920	down
LOC_Os08g39140	up	hsp82A
LOC_Os08g39170	up
LOC_Os08g39370	down
LOC_Os08g39380	down	OsXylT|RCN11
LOC_Os08g39460	down
LOC_Os01g56030	up
LOC_Os08g39820	up
LOC_Os08g40120	down
LOC_Os08g40150	down
LOC_Os08g40170	up	CDKB2;1|cdc2Os3|CDKB2
LOC_Os08g40440	up
LOC_Os08g40450	up
LOC_Os08g40610	down
LOC_Os08g40690	down
LOC_Os08g40940	down
LOC_Os08g41100	down
LOC_Os08g41210	down	OsKIX_9
LOC_Os08g41250	up
LOC_Os08g41470	down
LOC_Os08g41750	up
LOC_Os01g56200	down	NH2
LOC_Os08g41800	up
LOC_Os08g42290	down
LOC_Os08g42210	down
LOC_Os08g42370	up
LOC_Os08g42390	up
LOC_Os08g42910	up
LOC_Os08g43040	down
LOC_Os08g43170	up
LOC_Os08g43190	down
LOC_Os08g43240	up
LOC_Os08g43380	down
LOC_Os01g56330	up	DRUS2
LOC_Os01g56390	down
LOC_Os08g43870	up
LOC_Os08g43950	up
LOC_Os08g44050	up	OsIDD6
LOC_Os01g56480	down
LOC_Os08g44850	down
LOC_Os08g45070	down
LOC_Os08g45170	down
LOC_Os09g01310	up
LOC_Os09g01640	up
LOC_Os09g01960	down
LOC_Os09g02060	down
LOC_Os09g03090	down
LOC_Os09g03310	down
LOC_Os09g03570	up
LOC_Os09g03600	down
LOC_Os09g03680	up
LOC_Os09g03780	down
LOC_Os09g04384	up
LOC_Os09g04300	down
LOC_Os09g04310	down
LOC_Os09g04450	up
LOC_Os09g04670	up
LOC_Os09g04790	down	OsFBN1
LOC_Os01g56710	up
LOC_Os09g05020	down	OsPFA-DSP1
LOC_Os09g06680	down
LOC_Os09g06770	down
LOC_Os09g07620	up
LOC_Os09g08030	down
LOC_Os01g56790	down
LOC_Os09g08390	down
LOC_Os09g08580	down
LOC_Os09g08620	down
LOC_Os09g08720	down
LOC_Os09g08710	up
LOC_Os09g08910	down
LOC_Os09g10000	down
LOC_Os01g56880	down	OsPAP10a
LOC_Os09g11280	up
LOC_Os09g11320	up
LOC_Os09g11890	down
LOC_Os01g57004	down
LOC_Os09g12770	down	OsROC1|OsMYBc
LOC_Os09g12970	down
LOC_Os09g13870	down
LOC_Os09g14670	up
LOC_Os09g15540	up
LOC_Os09g15670	up	OsSIPP2C1|OsPP2C68|OsPP108
LOC_Os09g15700	down
LOC_Os09g15840	down
LOC_Os09g16030	up
LOC_Os09g16590	up
LOC_Os09g16910	up
LOC_Os09g16780	up
LOC_Os09g17120	down
LOC_Os01g57280	down
LOC_Os09g17580	up
LOC_Os09g17590	up
LOC_Os09g17740	down	OsCAB1R
LOC_Os09g19274	down
LOC_Os09g19380	down
LOC_Os09g20260	down
LOC_Os09g20660	down
LOC_Os09g21340	down
LOC_Os09g21740	down
LOC_Os09g22160	down
LOC_Os09g22090	up
LOC_Os09g22410	up
LOC_Os09g22480	down
LOC_Os09g22505	down
LOC_Os01g57470	up
LOC_Os01g57480	down	SDS2
LOC_Os09g23280	down
LOC_Os09g24530	up
LOC_Os09g24580	up
LOC_Os01g57540	down
LOC_Os09g25070	down	OsWRKY62
LOC_Os09g25600	up
LOC_Os09g25590	up
LOC_Os09g25760	down
LOC_Os01g57650	down
LOC_Os09g25890	up
LOC_Os09g26180	up
LOC_Os09g26300	down
LOC_Os09g26320	down
LOC_Os09g26330	down
LOC_Os01g57710	up
LOC_Os09g26530	down
LOC_Os09g26540	down
LOC_Os09g26554	down
LOC_Os09g26560	down
LOC_Os09g26550	down
LOC_Os09g26780	down	OsJAZ8|OsTIFY10c
LOC_Os01g57770	up
LOC_Os01g05090	down
LOC_Os09g27744	up
LOC_Os09g27870	down
LOC_Os09g27900	up
LOC_Os09g28110	down
LOC_Os09g28354	down	OsHsf23
LOC_Os09g29080	up
LOC_Os09g29239	up
LOC_Os09g29270	up
LOC_Os09g29430	down
LOC_Os09g29600	up
LOC_Os09g29660	down
LOC_Os09g29850	up
LOC_Os09g30300	down
LOC_Os09g30320	up	RA8
LOC_Os09g30414	down
LOC_Os09g30414	down
LOC_Os01g58024	down
LOC_Os09g31446	up
LOC_Os09g31498	down
LOC_Os09g32140	down
LOC_Os09g32290	down
LOC_Os09g32360	down
LOC_Os09g32760	up
LOC_Os01g58049	up
LOC_Os09g32920	up
LOC_Os09g32968	down
LOC_Os09g33450	down
LOC_Os09g33555	up
LOC_Os09g33730	down
LOC_Os09g33970	up
LOC_Os09g33900	down
LOC_Os09g34110	down
LOC_Os09g34150	down
LOC_Os09g34190	up
LOC_Os09g34310	up
LOC_Os09g34340	down
LOC_Os09g34290	up
LOC_Os09g35570	up
LOC_Os09g35560	up
LOC_Os09g35710	down
LOC_Os09g35730	down
LOC_Os09g35940	down
LOC_Os09g36040	up
LOC_Os09g36290	up
LOC_Os09g36350	up
LOC_Os09g36360	up
LOC_Os01g58330	down
LOC_Os09g36640	up
LOC_Os09g36630	up
LOC_Os09g36700	down
LOC_Os09g36730	up	OsMYB108
LOC_Os09g36735	up
LOC_Os09g37180	down
LOC_Os09g37400	up	OsSAUR45
LOC_Os09g37440	up
LOC_Os09g37540	down	OsLDC-like1
LOC_Os01g05130	down
LOC_Os09g37967	down
LOC_Os09g38020	up
LOC_Os09g38520	up
LOC_Os09g38660	up
LOC_Os09g38710	up
LOC_Os09g38870	down
LOC_Os09g39280	down
LOC_Os09g39430	down
LOC_Os01g58620	up
LOC_Os09g39750	up
LOC_Os09g39780	up	OsCYP-25|CYP19-3
LOC_Os01g58700	down
LOC_Os01g58780	up
LOC_Os01g59050	up
LOC_Os01g59265	down
LOC_Os01g59300	up
LOC_Os01g59560	down
LOC_Os01g59750	down
LOC_Os01g59930	up
LOC_Os01g60110	up
LOC_Os01g60600	down
LOC_Os01g60700	down
LOC_Os01g60910	up
LOC_Os01g05470	down
LOC_Os01g62060	down
LOC_Os01g62500	up
LOC_Os01g05540	down
LOC_Os01g62584	down
LOC_Os01g62610	down
LOC_Os01g62670	down
LOC_Os01g62750	down
LOC_Os01g62790	down
LOC_Os01g62880	up	OsI_04429|OsAKR3
LOC_Os01g05585	up	OsMT2d
LOC_Os01g62910	up
LOC_Os01g63400	up
LOC_Os01g63680	down
LOC_Os01g63710	up
LOC_Os01g63800	up
LOC_Os01g63830	up
LOC_Os01g63870	up
LOC_Os01g63940	down
LOC_Os01g64100	down
LOC_Os01g64110	down
LOC_Os01g64450	up
LOC_Os01g64540	up
LOC_Os01g64630	down
LOC_Os01g64890	up	OsMGT1
LOC_Os01g05720	up
LOC_Os01g65780	down
LOC_Os01g65890	up
LOC_Os01g66010	down
LOC_Os01g66040	down
LOC_Os01g66150	down
LOC_Os01g66160	up
LOC_Os01g66190	up
LOC_Os01g05820	down
LOC_Os01g66280	down
LOC_Os01g66530	up
LOC_Os01g66690	down	ZIP4|SPO22
LOC_Os01g66840	down
LOC_Os01g66890	down
LOC_Os01g67550	down
LOC_Os01g67580	down
LOC_Os01g67590	down
LOC_Os01g67600	up
LOC_Os01g67710	up
LOC_Os01g68545	down
LOC_Os01g06340	up
LOC_Os01g69904	down
LOC_Os01g69950	up
LOC_Os01g69960	up
LOC_Os01g70170	down
LOC_Os01g70180	down
LOC_Os01g06430	down
LOC_Os01g70500	up
LOC_Os01g70520	down
LOC_Os01g70525	down
LOC_Os01g70770	up
LOC_Os01g06454	down
LOC_Os01g71262	down
LOC_Os01g71620	down
LOC_Os01g71630	down
LOC_Os01g72330	down	OsRR4
LOC_Os01g72630	up
LOC_Os01g72650	down
LOC_Os01g72670	down	OsLCD
LOC_Os01g06640	down	OsbHLH035
LOC_Os01g72930	down	EMP5|OsEMP5
LOC_Os01g72960	up
LOC_Os01g73000	down
LOC_Os01g73470	down
LOC_Os01g73670	down
LOC_Os01g73940	up
LOC_Os01g73970	up
LOC_Os01g74310	down
LOC_Os01g74340	down
LOC_Os01g74540	down
LOC_Os01g74660	down
LOC_Os10g01380	up
LOC_Os10g01844	up
LOC_Os10g02220	up
LOC_Os10g02350	down
LOC_Os10g02880	down
LOC_Os10g03100	down
LOC_Os10g03480	down
LOC_Os10g03620	down
LOC_Os10g04270	down
LOC_Os01g07130	down
LOC_Os10g04660	down
LOC_Os10g04770	down
LOC_Os10g05180	down
LOC_Os10g05580	down
LOC_Os10g06860	up
LOC_Os10g07534	down
LOC_Os10g08011	down
LOC_Os01g01610	up
LOC_Os10g08780	up
LOC_Os10g08790	up
LOC_Os01g07376	up
LOC_Os10g10130	down	OsWAK112d
LOC_Os10g10020	up
LOC_Os10g10180	down
LOC_Os10g10880	down
LOC_Os10g11012	up
LOC_Os01g07540	up
LOC_Os10g14011	down
LOC_Os10g14194	up
LOC_Os01g07660	down
LOC_Os10g17100	up
LOC_Os10g17750	down
LOC_Os01g07720	up
LOC_Os10g20710	up
LOC_Os10g21040	up
LOC_Os10g21640	down
LOC_Os10g21810	down	OHK3|OsHk5
LOC_Os10g21930	down
LOC_Os10g22170	down
LOC_Os10g22484	up
LOC_Os10g22484	down
LOC_Os10g22630	down
LOC_Os10g22850	up
LOC_Os01g07940	up	OsPIDL
LOC_Os10g25010	down
LOC_Os10g25210	down
LOC_Os10g25570	down
LOC_Os10g27020	down
LOC_Os10g27190	down
LOC_Os10g27220	down
LOC_Os01g08090	down
LOC_Os10g28060	down	ONI2
LOC_Os10g28240	up
LOC_Os01g01670	up
LOC_Os10g29180	up
LOC_Os10g29240	up
LOC_Os10g30070	up
LOC_Os01g08240	up
LOC_Os10g30550	down
LOC_Os10g30870	down
LOC_Os10g30944	down
LOC_Os10g31510	down
LOC_Os10g31940	down
LOC_Os10g32570	up
LOC_Os01g08350	down
LOC_Os01g08360	down
LOC_Os10g33140	down
LOC_Os10g33170	up
LOC_Os10g33920	down
LOC_Os01g08470	down
LOC_Os10g34360	down	OsPKS1|YY2|OsLAP6
LOC_Os10g34580	down
LOC_Os10g34670	down
LOC_Os10g34810	up
LOC_Os10g35100	up
LOC_Os10g35090	down
LOC_Os10g35110	down
LOC_Os10g35180	up	OsABCG26
LOC_Os10g35290	up
LOC_Os10g35630	down
LOC_Os10g35670	up
LOC_Os10g35820	up
LOC_Os10g35990	down
LOC_Os10g36160	down
LOC_Os10g36170	down
LOC_Os01g08650	up
LOC_Os10g36340	up
LOC_Os10g36480	down
LOC_Os10g37060	up
LOC_Os10g37110	down
LOC_Os10g37600	up
LOC_Os10g37630	up
LOC_Os10g37740	down
LOC_Os10g37980	up
LOC_Os10g38020	up
LOC_Os10g38040	down	OsEMSA1
LOC_Os10g38050	up	OsNP1
LOC_Os10g38238	down
LOC_Os10g38489	down	Osgstu4
LOC_Os10g38489	down	Osgstu4
LOC_Os10g39130	down	OsMADS56
LOC_Os10g39200	down
LOC_Os10g39390	up
LOC_Os10g39460	down
LOC_Os10g39570	up
LOC_Os10g39920	down
LOC_Os10g40070	down
LOC_Os10g40559	up
LOC_Os10g40600	down	OsNRT1.3|NRT1.1B|OsNPF6.5
LOC_Os10g40820	up
LOC_Os10g41300	up
LOC_Os10g41380	up
LOC_Os10g41650	down
LOC_Os10g41829	down
LOC_Os10g41860	up
LOC_Os10g41960	down
LOC_Os10g42060	up
LOC_Os10g42280	up	OsPYL1
LOC_Os10g42710	down	OsSRO1a|TWI1
LOC_Os11g02240	down	OsCIPK15
LOC_Os11g02400	up
LOC_Os11g02440	up
LOC_Os11g02730	up
LOC_Os11g03300	down	ONAC122|OsNAC10
LOC_Os11g03420	up
LOC_Os11g03510	down
LOC_Os11g03920	down
LOC_Os11g04230	down
LOC_Os11g04470	up
LOC_Os11g04920	down
LOC_Os11g04900	up
LOC_Os11g05410	down
LOC_Os11g05860	down
LOC_Os01g09800	down	OsNPR1|NH1
LOC_Os11g06330	up
LOC_Os01g09830	up
LOC_Os11g06240	up
LOC_Os11g06420	up
LOC_Os11g06850	up
LOC_Os11g06934	down
[truncated: 298 more rows]

## Sheet: Table S4
Table S4 Common differentially expressed genes (coDEGs) between HF and H1
gene_id	regulation
LOC_Os01g02950	down
LOC_Os01g36820	down
LOC_Os01g65690	down
LOC_Os02g20060	down
LOC_Os02g51910	down
LOC_Os03g25240	down
LOC_Os03g51556	down
LOC_Os04g20490	down
LOC_Os04g42020	down
LOC_Os05g16750	down
LOC_Os05g51360	down
LOC_Os06g16610	down
LOC_Os06g20820	down
LOC_Os10g33190	down
LOC_Os11g41940	down
LOC_Os11g42170	down
LOC_Os12g05180	down
LOC_Os12g08480	down
LOC_Os12g36070	down
LOC_Os02g03970	down
LOC_Os02g04060	down
LOC_Os02g04725	down
LOC_Os02g06190	down
LOC_Os02g06010	down
LOC_Os02g06030	down
LOC_Os02g06754	down
LOC_Os02g06760	down
LOC_Os02g06790	down
LOC_Os02g08100	down
LOC_Os02g08160	down
LOC_Os02g11640	down
LOC_Os02g14059	down
LOC_Os02g17620	down
LOC_Os01g18230	down
LOC_Os02g30114	down
LOC_Os02g31140	down
LOC_Os02g31850	down
LOC_Os02g33580	down
LOC_Os02g34220	down
LOC_Os02g36350	down
LOC_Os02g36690	down
LOC_Os02g38300	down
LOC_Os02g38860	down
LOC_Os02g38890	down
LOC_Os02g40010	down
LOC_Os02g40320	down
LOC_Os02g40280	down
LOC_Os02g40340	down
LOC_Os02g41450	down
LOC_Os02g42520	down
LOC_Os02g42530	down
LOC_Os02g43230	down
LOC_Os02g43770	down
LOC_Os02g46600	down
LOC_Os01g21180	down
LOC_Os02g47150	down
LOC_Os02g48870	down
LOC_Os02g49610	down
LOC_Os02g50700	down
LOC_Os02g50690	down
LOC_Os02g51060	down
LOC_Os02g51620	down
LOC_Os02g55870	down
LOC_Os02g55890	down
LOC_Os02g56600	down
LOC_Os03g01365	down
LOC_Os03g04020	down
LOC_Os03g04140	down
LOC_Os03g05334	down
LOC_Os03g14520	down
LOC_Os03g15740	down
LOC_Os01g27340	down
LOC_Os03g18850	down
LOC_Os03g18890	down
LOC_Os01g27700	down
LOC_Os03g20700	down
LOC_Os03g26120	down
LOC_Os03g26500	down
LOC_Os03g28250	down
LOC_Os03g31760	down
LOC_Os03g32330	down
LOC_Os03g35950	down
LOC_Os03g36080	down
LOC_Os03g39040	down
LOC_Os03g40180	down
LOC_Os03g44180	down
LOC_Os03g44450	down
LOC_Os03g46660	down
LOC_Os03g50560	down
LOC_Os03g50800	down
LOC_Os03g51970	down
LOC_Os01g33684	down
LOC_Os01g33710	down
LOC_Os01g33760	down
LOC_Os03g57160	down
LOC_Os03g57690	down
LOC_Os03g58800	down
LOC_Os03g59880	down
LOC_Os03g61150	down
LOC_Os03g61670	down
LOC_Os03g62620	down
LOC_Os01g35330	down
LOC_Os03g63870	down
LOC_Os04g01140	down
LOC_Os04g01674	down
LOC_Os04g04740	down
LOC_Os04g05050	down
LOC_Os04g06280	down
LOC_Os04g06350	down
LOC_Os04g06850	down
LOC_Os04g08800	down
LOC_Os04g09350	down
LOC_Os04g09720	down
LOC_Os04g09810	down
LOC_Os04g10350	down
LOC_Os04g10490	down
LOC_Os04g11570	down
LOC_Os04g17064	down
LOC_Os04g18380	down
LOC_Os04g21740	down
LOC_Os01g37500	down
LOC_Os04g31804	down
LOC_Os04g31790	down
LOC_Os04g32270	down
LOC_Os04g32350	down
LOC_Os04g33110	down
LOC_Os04g33720	down
LOC_Os04g33880	down
LOC_Os04g35290	down
LOC_Os04g35890	down
LOC_Os04g36910	down
LOC_Os01g04409	down
LOC_Os04g44550	down
LOC_Os04g44900	down
LOC_Os04g46300	down
LOC_Os04g47300	down
LOC_Os04g47720	down
LOC_Os04g49280	down
LOC_Os04g49520	down
LOC_Os04g49748	down
LOC_Os04g50020	down
LOC_Os04g50670	down
LOC_Os04g51480	down
LOC_Os04g52450	down
LOC_Os04g52660	down
LOC_Os04g52630	down
LOC_Os04g52940	down
LOC_Os04g53520	down
LOC_Os04g59380	down
LOC_Os05g02770	down
LOC_Os05g08460	down
LOC_Os05g10414	down
LOC_Os05g10570	down
LOC_Os05g23610	down
LOC_Os05g25390	down
LOC_Os05g25974	down
LOC_Os05g29750	down
LOC_Os05g32360	down
LOC_Os05g34240	down
LOC_Os05g34800	down
LOC_Os05g35150	down
LOC_Os01g43610	down
LOC_Os05g36340	down
LOC_Os05g38219	down
LOC_Os05g38710	down
LOC_Os05g42160	down
LOC_Os01g45200	down
LOC_Os05g49630	down
LOC_Os05g50330	down
LOC_Os05g50650	down
LOC_Os05g51050	down
LOC_Os06g04830	down
LOC_Os06g04930	down
LOC_Os06g05355	down
LOC_Os06g07590	down
LOC_Os06g08890	down
LOC_Os06g08884	down
LOC_Os06g09950	down
LOC_Os06g10730	down
LOC_Os06g11010	down
LOC_Os06g12170	down
LOC_Os06g12730	down
LOC_Os06g14324	down
LOC_Os06g14870	down
LOC_Os06g15560	down
LOC_Os06g16270	down
LOC_Os06g18670	down
LOC_Os06g21369	down
LOC_Os06g22919	down
LOC_Os06g24240	down
LOC_Os06g27900	down
LOC_Os06g28124	down
LOC_Os06g31220	down
LOC_Os06g35520	down
LOC_Os06g37130	down
LOC_Os06g37440	down
LOC_Os06g38210	down
LOC_Os06g38650	down
LOC_Os06g38730	down
LOC_Os06g38780	down
LOC_Os06g39130	down
LOC_Os06g41120	down
LOC_Os06g44034	down
LOC_Os06g44040	down
LOC_Os01g49370	down
LOC_Os06g46995	down
LOC_Os06g47570	down
LOC_Os06g49410	down
LOC_Os06g49890	down
LOC_Os06g49920	down
LOC_Os06g49930	down
LOC_Os06g51050	down
LOC_Os07g02360	down
LOC_Os07g03120	down
LOC_Os07g04440	down
LOC_Os07g05290	down
LOC_Os01g03410	down
LOC_Os07g06530	down
LOC_Os07g12510	down
LOC_Os07g12910	down
LOC_Os07g17230	down
LOC_Os01g51280	down
LOC_Os07g20544	down
LOC_Os07g25510	down
LOC_Os07g25740	down
LOC_Os07g29300	down
LOC_Os01g52214	down
LOC_Os07g35370	down
LOC_Os07g35390	down
LOC_Os07g35480	down
LOC_Os07g40140	down
LOC_Os07g41170	down
LOC_Os07g41840	down
LOC_Os07g46780	down
LOC_Os07g47460	down
LOC_Os07g47970	down
LOC_Os07g48520	down
LOC_Os07g49150	down
LOC_Os08g03670	down
LOC_Os01g53810	down
LOC_Os01g53820	down
LOC_Os08g06810	down
LOC_Os08g08592	down
LOC_Os08g08970	down
LOC_Os08g10620	down
LOC_Os08g13090	down
LOC_Os08g13630	down
LOC_Os08g14890	down
LOC_Os08g15444	down
LOC_Os08g15590	down
LOC_Os08g15600	down
LOC_Os08g16010	down
LOC_Os08g19374	down
LOC_Os08g19470	down
LOC_Os08g22604	down
LOC_Os08g22864	down
LOC_Os08g24140	down
LOC_Os08g24250	down
LOC_Os08g24290	down
LOC_Os08g27220	down
LOC_Os08g28460	down
LOC_Os08g28580	down
LOC_Os08g28820	down
LOC_Os08g28800	down
LOC_Os08g29854	down
LOC_Os08g30020	down
LOC_Os08g30860	down
LOC_Os08g32310	down
LOC_Os08g34050	down
LOC_Os08g35939	down
LOC_Os08g36220	down
LOC_Os08g40120	down
LOC_Os08g40150	down
LOC_Os08g40610	down
LOC_Os08g42290	down
LOC_Os08g42210	down
LOC_Os08g43190	down
LOC_Os08g44850	down
LOC_Os08g45070	down
LOC_Os09g02060	down
LOC_Os09g03310	down
LOC_Os09g04300	down
LOC_Os09g04310	down
LOC_Os09g06770	down
LOC_Os09g08030	down
LOC_Os09g10000	down
LOC_Os09g11890	down
LOC_Os09g12970	down
LOC_Os09g15840	down
LOC_Os09g17120	down
LOC_Os01g57280	down
LOC_Os09g19380	down
LOC_Os09g20260	down
LOC_Os09g21340	down
LOC_Os09g25070	down
LOC_Os09g26300	down
LOC_Os09g26320	down
LOC_Os09g26330	down
LOC_Os09g26530	down
LOC_Os09g26540	down
LOC_Os09g26554	down
LOC_Os09g26560	down
LOC_Os09g26550	down
LOC_Os01g05090	down
LOC_Os09g30300	down
LOC_Os09g32140	down
LOC_Os09g34340	down
LOC_Os09g37540	down
LOC_Os09g39280	down
LOC_Os09g39430	down
LOC_Os01g60700	down
LOC_Os01g05540	down
LOC_Os01g62750	down
LOC_Os01g65780	down
LOC_Os01g66040	down
LOC_Os01g66840	down
LOC_Os01g67550	down
LOC_Os01g68545	down
LOC_Os01g70525	down
LOC_Os01g06454	down
LOC_Os01g72330	down
LOC_Os01g72650	down
LOC_Os01g73470	down
LOC_Os01g74340	down
LOC_Os01g74540	down
LOC_Os01g74660	down
LOC_Os10g03100	down
LOC_Os10g04270	down
LOC_Os10g05180	down
LOC_Os10g08011	down
LOC_Os10g10180	down
LOC_Os10g10880	down
LOC_Os10g14011	down
LOC_Os01g07660	down
LOC_Os10g21640	down
LOC_Os10g21930	down
LOC_Os10g22170	down
LOC_Os10g22484	down
LOC_Os10g22630	down
LOC_Os10g25010	down
LOC_Os10g30550	down
LOC_Os10g31940	down
LOC_Os01g08350	down
LOC_Os10g33140	down
LOC_Os10g33920	down
LOC_Os10g34670	down
LOC_Os10g35990	down
LOC_Os10g38238	down
LOC_Os10g39130	down
LOC_Os10g40070	down
LOC_Os11g03510	down
LOC_Os11g04230	down
LOC_Os11g04920	down
LOC_Os01g09800	down
LOC_Os11g06934	down
LOC_Os11g07060	down
LOC_Os11g07120	down
LOC_Os11g07720	down
LOC_Os11g07860	down
LOC_Os11g08100	down
LOC_Os11g08300	down
LOC_Os11g08940	down
LOC_Os11g08830	down
LOC_Os11g09590	down
LOC_Os11g09710	down
LOC_Os11g10200	down
LOC_Os11g11550	down
LOC_Os11g11890	down
LOC_Os11g14544	down
LOC_Os11g15000	down
LOC_Os11g17290	down
LOC_Os11g20384	down
LOC_Os11g26350	down
LOC_Os11g27430	down
LOC_Os11g29750	down
LOC_Os11g30370	down
LOC_Os11g33320	down
LOC_Os11g34270	down
LOC_Os11g34760	down
LOC_Os11g34840	down
LOC_Os11g34770	down
LOC_Os11g34790	down
LOC_Os11g34810	down
LOC_Os11g34820	down
LOC_Os11g34850	down
LOC_Os11g37250	down
LOC_Os01g11650	down
LOC_Os11g37950	down
LOC_Os11g38330	down
LOC_Os11g38590	down
LOC_Os11g40410	down
LOC_Os11g40560	down
LOC_Os11g41365	down
LOC_Os11g41530	down
LOC_Os11g41650	down
LOC_Os11g42040	down
LOC_Os11g42360	down
LOC_Os11g42800	down
LOC_Os11g43070	down
LOC_Os11g43990	down
LOC_Os11g44310	down
LOC_Os11g47130	down
LOC_Os11g47580	down
LOC_Os01g12381	down
LOC_Os11g47710	down
LOC_Os11g47809	down
LOC_Os01g12340	down
LOC_Os01g12374	down
LOC_Os12g02050	down
LOC_Os12g02540	down
LOC_Os12g04990	down
LOC_Os12g06660	down
LOC_Os12g06810	down
LOC_Os12g07180	down
LOC_Os12g07300	down
LOC_Os12g10450	down
LOC_Os12g18360	down
LOC_Os01g13610	down
LOC_Os12g23610	down
LOC_Os12g24020	down
LOC_Os12g24084	down
LOC_Os12g24310	down
LOC_Os12g32310	down
LOC_Os12g32370	down
LOC_Os12g33958	down
LOC_Os12g36320	down
LOC_Os12g36400	down
LOC_Os01g14770	down
LOC_Os12g37530	down
LOC_Os12g38930	down
LOC_Os12g39440	down
LOC_Os12g39710	down
LOC_Os12g41480	down
LOC_Os12g41510	down
LOC_Os12g42900	down
LOC_Os12g43640	down
LOC_Os01g25720	up
LOC_Os01g39590	up
LOC_Os07g34880	up
LOC_Os08g13000	up
LOC_Os08g35580	up
LOC_Os11g05770	up
LOC_Os11g24550	up
LOC_Os12g07760	up
LOC_Os02g07260	up
LOC_Os02g07720	up
LOC_Os01g02420	up
LOC_Os02g11110	up
LOC_Os02g22750	up
LOC_Os02g29590	up
LOC_Os02g29890	up
LOC_Os02g30050	up
LOC_Os01g18850	up
LOC_Os02g35220	up
LOC_Os01g19400	up
LOC_Os02g37080	up
LOC_Os02g39384	up
LOC_Os01g19990	up
LOC_Os02g46100	up
LOC_Os02g50210	up
LOC_Os02g50220	up
LOC_Os02g50630	up
LOC_Os02g55670	up
LOC_Os02g55720	up
LOC_Os02g55770	up
LOC_Os02g55710	up
LOC_Os02g56100	up
LOC_Os01g22540	up
LOC_Os02g57800	up
LOC_Os01g23740	up
LOC_Os03g02170	up
LOC_Os03g06700	up
LOC_Os03g06705	up
LOC_Os03g12810	up
LOC_Os03g13040	up
LOC_Os03g13100	up
LOC_Os03g14690	up
LOC_Os03g15380	up
LOC_Os03g16718	up
LOC_Os03g19500	up
LOC_Os03g20500	up
LOC_Os03g22250	up
LOC_Os03g28400	up
LOC_Os03g30590	up
LOC_Os01g29780	up
LOC_Os03g32499	up
LOC_Os03g32560	up
LOC_Os03g40060	up
LOC_Os03g41080	up
LOC_Os03g46770	up
LOC_Os03g47670	up
LOC_Os03g48170	up
LOC_Os03g55660	up
LOC_Os03g55670	up
LOC_Os03g56100	up
LOC_Os03g56080	up
LOC_Os03g56590	up
LOC_Os03g56790	up
LOC_Os03g57640	up
LOC_Os03g61930	up
LOC_Os03g63430	up
LOC_Os04g06520	up
LOC_Os04g12550	up
LOC_Os04g16270	up
LOC_Os04g20330	up
LOC_Os04g20400	up
LOC_Os04g23590	up
LOC_Os04g23700	up
LOC_Os04g25784	up
LOC_Os04g26590	up
LOC_Os04g27800	up
LOC_Os04g28090	up
LOC_Os04g30230	up
LOC_Os04g32790	up
LOC_Os04g40490	up
LOC_Os04g47890	up
LOC_Os04g48840	up
LOC_Os04g54390	up
LOC_Os01g41120	up
LOC_Os01g41530	up
LOC_Os05g01950	up
LOC_Os01g41565	up
LOC_Os05g04215	up
LOC_Os05g06970	up
LOC_Os05g11840	up
LOC_Os05g12481	up
LOC_Os05g20304	up
LOC_Os05g20630	up
LOC_Os05g25260	up
LOC_Os05g33500	up
LOC_Os05g33940	up
LOC_Os05g35360	up
LOC_Os05g35730	up
LOC_Os05g37650	up
LOC_Os01g44100	up
LOC_Os05g43680	up
LOC_Os05g44180	up
LOC_Os05g45080	up
LOC_Os01g45040	up
LOC_Os05g47650	up
LOC_Os05g50060	up
LOC_Os05g50560	up
LOC_Os05g50570	up
LOC_Os06g04240	up
LOC_Os06g05620	up
LOC_Os06g07240	up
LOC_Os06g10355	up
LOC_Os06g12210	up
LOC_Os06g17130	up
LOC_Os06g19650	up
LOC_Os06g21120	up
LOC_Os06g21600	up
LOC_Os06g21620	up
LOC_Os06g25930	up
LOC_Os06g25500	up
LOC_Os01g48120	up
LOC_Os06g28240	up
LOC_Os06g28970	up
LOC_Os06g34780	up
LOC_Os06g35500	up
LOC_Os06g38710	up
LOC_Os06g41840	up
LOC_Os01g03350	up
LOC_Os01g03330	up
LOC_Os01g03340	up
LOC_Os06g45610	up
LOC_Os06g46770	up
LOC_Os06g48060	up
LOC_Os06g50450	up
LOC_Os06g50580	up
LOC_Os06g50590	up
LOC_Os06g51240	up
LOC_Os06g51500	up
LOC_Os07g01880	up
LOC_Os07g01890	up
LOC_Os01g50310	up
LOC_Os07g08710	up
LOC_Os07g08520	up
LOC_Os07g09420	up
LOC_Os07g18710	up
LOC_Os07g23970	up
LOC_Os07g31670	up
LOC_Os07g35310	up
LOC_Os07g35335	up
LOC_Os07g37820	up
LOC_Os01g03630	up
LOC_Os07g44070	up
LOC_Os07g44320	up
LOC_Os07g47790	up
LOC_Os07g48900	up
LOC_Os08g01810	up
LOC_Os08g09450	up
LOC_Os08g12680	up
LOC_Os08g13310	up
LOC_Os08g14350	up
LOC_Os08g15650	up
LOC_Os08g19910	up
LOC_Os08g23320	up
LOC_Os08g31720	up
LOC_Os08g34879	up
LOC_Os08g37456	up
LOC_Os08g38780	up
LOC_Os08g39140	up
LOC_Os08g41250	up
LOC_Os08g42390	up
LOC_Os08g43240	up
LOC_Os09g04384	up
LOC_Os01g56710	up
LOC_Os09g08710	up
LOC_Os09g11280	up
LOC_Os09g16910	up
LOC_Os09g16780	up
LOC_Os09g17580	up
LOC_Os09g22090	up
LOC_Os09g22410	up
LOC_Os09g27900	up
LOC_Os09g29080	up
LOC_Os09g34310	up
LOC_Os09g38020	up
LOC_Os09g39780	up
LOC_Os01g59050	up
LOC_Os01g59300	up
LOC_Os01g60110	up
LOC_Os01g60910	up
LOC_Os01g63870	up
LOC_Os01g66530	up
LOC_Os01g72630	up
LOC_Os10g02220	up
LOC_Os10g08780	up
LOC_Os01g07376	up
LOC_Os10g29240	up
LOC_Os10g33170	up
LOC_Os10g35290	up
LOC_Os10g38020	up
LOC_Os10g42060	up
LOC_Os11g02730	up
LOC_Os11g03420	up
LOC_Os11g06240	up
LOC_Os11g07010	up
LOC_Os11g07000	up
LOC_Os11g07130	up
LOC_Os11g09200	up
LOC_Os11g09770	up
LOC_Os11g11100	up
LOC_Os11g11650	up
LOC_Os11g11640	up
LOC_Os11g15580	up
LOC_Os11g19764	up
LOC_Os11g31450	up
LOC_Os11g35710	up
LOC_Os11g39220	up
LOC_Os11g39568	up
LOC_Os11g41900	up
LOC_Os11g42010	up
LOC_Os11g43934	up
LOC_Os11g46070	up
LOC_Os11g45809	up
LOC_Os12g02130	up
LOC_Os12g02660	up
LOC_Os12g12120	up
LOC_Os12g14110	up
LOC_Os12g17370	up
LOC_Os12g23450	up
LOC_Os12g26480	up
LOC_Os12g35080	up
LOC_Os12g37100	up
LOC_Os12g37900	up
LOC_Os12g41540	up
HF and H1 indicate high fertilityrecombinant inbred line and neo-tetraploid rice, respectively

## Sheet: Table S5
Table S5 Eight candidate genes related to the anther development
Gene_id	Gene_Name	Annotation	coDEGs	Refference
LOC_Os01g27340		glutathione S-transferase, putative, expressed	down	PMC-specific [34]; DEG [10]
LOC_Os01g50310		VIP1 protein, putative, expressed	up	PMC-specific [34]; DEG [10]
LOC_Os03g59880		expressed protein	down	PMC-specific [34]; DEG [10]
LOC_Os03g61670		calreticulin precursor, putative, expressed	down	PMC-specific [34]; DEG [10]
LOC_Os04g47890	MOF1	MYB family transcription factor, putative, expressed	up	PMC-specific [34]; DEG [10]
LOC_Os08g37456		flavonol synthase/flavanone 3-hydroxylase, putative, expressed	up	PMC-specific [34]; DEG [10]
LOC_Os08g43240		LTPL97 - Protease inhibitor/seed storage/LTP family protein precursor, expressed	up	PMC-specific [34]; DEG [10]
LOC_Os10g05180		26S proteasome regulatory subunit S5A, putative, expressed	down	PMC-specific [34]; DEG [10]
coDEGs: common differentially expressed genes in H1 and HF relative to LF
DEG: differentially expressed gene; PMC-specific: specifically or preferentially expressed in pollen mother cells
LF, HF and H1 indicate low pollen fertility recombinant inbred line, high fertility recombinant inbred line and neo-tetraploid rice, respectively

## Sheet: Table S6
Table S6 The SNPs and InDels of MOF1a in H1a
CHR	POS	REF	ALT	Region	H1
Chr4	28470402	T	TGAGAGAGAGAGA	5_prime_UTR	TGAGAGAGAGAGA/TGAGAGAGAGAGA
Chr4	28470421	G	GAGAGAGAGAGAG	5_prime_UTR	GAGAGAGAGAGAG/GAGAGAGAGAGAG
Chr4	28470490	T	C	5_prime_UTR	C/C
Chr4	28470603	GAA	G	5_prime_UTR	G/G
Chr4	28471159	G	T	INTRON	T/T
Chr4	28471194	ATT	A	INTRON	A/A
Chr4	28471363	TTCTC	T	INTRON	T/T
Chr4	28471404	T	G	INTRON	G/G
Chr4	28471410	T	C	INTRON	C/C
Chr4	28471463	G	T	EXON	T/T
Chr4	28471549	C	T	INTRON	T/T
Chr4	28471404	G	GAT	INTRON	GAT/GAT
Chr4	28473005	G	A	INTRON	A/A
Chr4	28473480	C	T	INTRON	T/T
Chr4	28473517	G	A	INTRON	A/A
Chr4	28473550	A	AAAAC	INTRON	AAAAC/AAAAC
Chr4	28473641	T	G	INTRON	G/G
Chr4	28473680	T	C	INTRON	C/C
Chr4	28473777	T	C	INTRON	C/C
Chr4	28473848	A	G	EXON	G/G
aH1 indicate a neo-tetraploid line.
CHR: Chromosome name of reference sequence
POS: Position of reference sequence (bp)
REF: Sequence at reference sequence corresponding position
ALT: Sequence of SNP at reference sequence corresponding position

## Sheet: Table S7
Table S7 Detailed information about expression pattern analysis of MOF1 by RNA-seq data (Fig. S5)
Sun-figure	Index	Meterial	Tissue	Stage	Reference
Fig. S3a	B01	134	Anther	Meiosis	[25]
	B02	66	Anther	Meiosis	[25]
	B03	Huaduo3	Anther	Meiosis	[1]
	B04	T44	Anther	Meiosis	[25]
	B05	T45	Anther	Meiosis	[25]
	B07	T452	Anther	Meiosis	[1]
	B08	Huaduo3	Anther	Meiosis	[1]
	B09	F1 (T452×Huaduo3)	Anther	Meiosis	[1]
	HP2	H1	Anther	0 DAF	[18]
	HMA	H1	Anther+Ovary	Meiosis	[18]
	B06	F1 (T452×Huaduo3)	Ovary	Meiosis	[1]
	B10	T452	Ovary	Meiosis	[1]
	B11	Huaduo3	Ovary	Meiosis	[1]
	HP3	H1	Ovary	3 DAF	[18]
	HE2	H1	Ovary	0 DAF	[18]
	B12	T452	Flag leaf	0 DAF	[1]
	B13	Huaduo3	Flag leaf	0 DAF	[1]
	B14	F1 (T452×Huaduo3)	Flag leaf	0 DAF	[1]
	HL1	H1	Flag leaf	Meiosis	[18]
	HL2	H1	Flag leaf	0 DAF	[18]
	HL3	H1	Flag leaf	3 DAF	[18]
	HZ2	H1	Sheath	0 DAF	[18]
	HZ3	H1	Sheath	3 DAF	[18]
Fig. S3b	AP	Huaduo8	Spikelets	Panicle < 5 mm	unpubished
	BP	T485	Spikelets	Panicle < 5 mm	unpubished
	CP	F1(T485×Huaduo8)	Spikelets	Panicle < 5 mm	unpubished
	MP	H1	Spikelets	Panicle < 5 mm	unpubished
	SP	F1(Huaduo8×H1)	Spikelets	Panicle < 5 mm	unpubished
	DA	F1(T485×Huaduo8)	Anther	Meiosis	unpubished
	EA	F1(H1×Huaduo8)	Anther	Meiosis	unpubished
	FA	F1(H1×485)	Anther	Meiosis	unpubished
Fig. S3c	A	H1	Flag leave	0 DAF	[24]
	B	T485	Flag leave	0 DAF	[24]
	C	Huaduo8	Flag leave	0 DAF	[24]
	D	F1(T485×Huaduo8)	Flag leave	0 DAF	[24]
	E	F1(H1×Huaduo8)	Flag leave	0 DAF	[24]
	F	F1(H1×485)	Flag leave	0 DAF	[24]
	A	H1	Flag leave	5 DAF	[24]
	B	T485	Flag leave	5 DAF	[24]
	C	Huaduo8	Flag leave	5 DAF	[24]
	D	F1(T485×Huaduo8)	Flag leave	5 DAF	[24]
	E	F1(H1×Huaduo8)	Flag leave	5 DAF	[24]
	F	F1(H1×485)	Flag leave	5 DAF	[24]
	A	H1	Sheath	0 DAF	[24]
	B	T485	Sheath	0 DAF	[24]
	C	Huaduo8	Sheath	0 DAF	[24]
	D	F1(T485×Huaduo8)	Sheath	0 DAF	[24]
	E	F1(H1×Huaduo8)	Sheath	0 DAF	[24]
	F	F1(H1×485)	Sheath	0 DAF	[24]
	A	H1	Sheath	5 DAF	[24]
	B	T485	Sheath	5 DAF	[24]
	C	Huaduo8	Sheath	5 DAF	[24]
	D	F1(T485×Huaduo8)	Sheath	5 DAF	[24]
	E	F1(H1×Huaduo8)	Sheath	5 DAF	[24]
	F	F1(H1×485)	Sheath	5 DAF	[24]
	A	H1	Ovary	0 DAF	[24]
	B	T485	Ovary	0 DAF	[24]
	C	Huaduo8	Ovary	0 DAF	[24]
	D	F1(T485×Huaduo8)	Ovary	0 DAF	[24]
	E	F1(H1×Huaduo8)	Ovary	0 DAF	[24]
	F	F1(H1×485)	Ovary	0 DAF	[24]
	A	H1	Ovary	5 DAF	[24]
	B	T485	Ovary	5 DAF	[24]
	C	Huaduo8	Ovary	5 DAF	[24]
	D	F1(T485×Huaduo8)	Ovary	5 DAF	[24]
	E	F1(H1×Huaduo8)	Ovary	5 DAF	[24]
	F	F1(H1×485)	Ovary	5 DAF	[24]
	A	H1	Panicle branch	0 DAF	[24]
	B	T485	Panicle branch	0 DAF	[24]
	C	Huaduo8	Panicle branch	0 DAF	[24]
	D	F1(T485×Huaduo8)	Panicle branch	0 DAF	[24]
	E	F1(H1×Huaduo8)	Panicle branch	0 DAF	[24]
	F	F1(H1×485)	Panicle branch	0 DAF	[24]
	A	H1	Panicle branch	5 DAF	[24]
	B	T485	Panicle branch	5 DAF	[24]
	C	Huaduo8	Panicle branch	5 DAF	[24]
	D	F1(T485×Huaduo8)	Panicle branch	5 DAF	[24]
	E	F1(H1×Huaduo8)	Panicle branch	5 DAF	[24]
	F	F1(H1×485)	Panicle branch	5 DAF	[24]
Fig. S3d	H1	H1	Anther	Microsporogenesis	This study
	HF	HF	Anther	Microsporogenesis	This study
	LF	LF	Anther	Microsporogenesis	This study
	E252	E252	Anther	Meiosis	[1]
	T452	T452	Anther	Meiosis	[1]
H1, Huaduo3, Huaduo8, 134, 66 are neo-tetraploid rice lines; T44, T45, T452, T485 are autotetraploid rice lines; DAF = day after-flowering; 0 DAF = before flowering

## Sheet: Table S8
Table S8 The seed setting and mutant information of WT and mof1a
Plants	Seed setting (%)	Target1	Target2	Lines	Date
		Mutation	Mutation
1	63.15	wt	wt	WT	2019-11
2	79.36	wt	wt	WT	2019-11
3	71.91	wt	wt	WT	2019-11
4	70.59	wt	wt	WT	2019-11
5	67.67	wt	wt	WT	2019-11
6	80.93	wt	wt	WT	2020-06
7	72	wt	wt	WT	2020-06
8	83.23	wt	wt	WT	2020-06
9	76.53	wt	wt	WT	2020-06
10	64.27	wt	wt	WT	2020-06
11	73.76	wt	wt	WT	2020-06
12	82.62	wt	wt	WT	2020-06
13	72.61	wt	wt	WT	2020-06
14	75.4	wt	wt	WT	2020-06
15	74.45	wt	wt	WT	2020-06
16	76.63	wt	wt	WT	2020-06
17	81.67	wt	wt	WT	2020-06
18	74.86	wt	wt	WT	2020-06
1	31.66	ATGG>A	T>TT	T0-01	2019-11
2	23.39	A>AA	wt	T0-02	2019-11
3	28.17	A>AC	wt	T0-10	2019-11
4	11.44	CATGG>C/ATGG>A	GT>G/wt	T0-11	2019-11
5	23.14	T>TTT	T>TT/wt	T0-14	2019-11
6	46.58	A>AA	A>AA	mof1a-1	2020-06
7	53.16	A>AA	A>AA	mof1a-1	2020-06
8	67.38	A>AA	A>AA	mof1a-1	2020-06
9	22.71	A>AA	A>AA	mof1a-1	2020-06
10	31.62	A>AA	A>AA	mof1a-1	2020-06
11	12.83	A>AA	wt	mof1a-2	2020-06
12	60.82	A>AA	wt	mof1a-2	2020-06
13	30.34	A>AA	wt	mof1a-2	2020-06
14	37.16	A>AA	wt	mof1a-2	2020-06
15	34.47	A>AA	wt	mof1a-2	2020-06
16	33.87	T>TT	wt	mof1a-3	2020-06
17	16.96	T>TT	wt	mof1a-3	2020-06
18	55.67	T>TT	wt	mof1a-3	2020-06
19	43.17	T>TT	wt	mof1a-3	2020-06
20	67.49	T>TT	wt	mof1a-3	2020-06
hom = Homozygote; wt = Wild type (H1); het = Heterozygote.

## Sheet: Table S9
Table S9 Differentially expressed genes (DEGs) between mof1a and WT
gene_id	regulation	GeneName
LOC_Os07g28210	up
LOC_Os07g28644	up
LOC_Os02g06830	down
LOC_Os07g18300	down
LOC_Os07g26100	down
LOC_Os03g02470	up
LOC_Os02g37254	down
LOC_Os04g02490	down
LOC_Os07g29080	down
LOC_Os07g28590	up
LOC_Os10g22570	down
LOC_Os01g70720	up
LOC_Os03g01520	up
LOC_Os07g29060	down
LOC_Os10g11100	up
LOC_Os10g42150	up
LOC_Os10g30820	down
LOC_Os07g48790	down
LOC_Os07g31690	up
LOC_Os08g07720	up
LOC_Os07g14514	down
LOC_Os03g18779	up
LOC_Os03g14310	down	Sc
LOC_Os06g15570	up
LOC_Os07g40890	up
LOC_Os12g36750	up
LOC_Os01g16960	up
LOC_Os08g42750	up	OsCPK21
LOC_Os11g01990	up
LOC_Os09g38730	up
LOC_Os01g06852	up
LOC_Os07g28480	up
LOC_Os06g04930	up
LOC_Os07g35350	up
LOC_Os11g12330	down
LOC_Os07g06834	up
LOC_Os06g03600	up
LOC_Os02g54550	up
LOC_Os07g46210	up
LOC_Os05g37190	up
LOC_Os03g61150	up
LOC_Os05g15820	up
LOC_Os07g28850	down	AGO18|OsAGO18
LOC_Os01g67110	down
LOC_Os05g05920	up
LOC_Os11g11920	down
LOC_Os01g14430	up
LOC_Os03g10950	up
LOC_Os03g07250	up	CYP704B2
LOC_Os05g23960	up
LOC_Os01g16124	up
LOC_Os07g01904	up
LOC_Os03g24200	up
LOC_Os10g39500	down
LOC_Os03g40040	up
LOC_Os11g14120	down
LOC_Os08g16359	up
LOC_Os06g41830	up
LOC_Os12g02370	up
LOC_Os03g57200	up
LOC_Os04g24530	up	OsACOS12
LOC_Os03g47896	up
LOC_Os03g38359	down
LOC_Os07g40850	up
LOC_Os08g27759	down
LOC_Os03g15460	up	PLA2-II
LOC_Os12g41640	up
LOC_Os06g45130	up
LOC_Os06g07887	up
LOC_Os08g15600	up
LOC_Os10g41330	up
LOC_Os07g20330	up
LOC_Os01g44200	down
LOC_Os07g40860	up
LOC_Os03g15710	up	OsSTRL2
LOC_Os03g07140	up	DPW
LOC_Os07g37090	up	OSRIP18
LOC_Os05g07240	up
LOC_Os07g20135	up
LOC_Os01g14030	up
LOC_Os03g21700	up
LOC_Os06g05930	up
LOC_Os06g44840	up	OsHGGT|HGGT|SGD1|RTD1
LOC_Os05g38350	up
LOC_Os02g31300	up
LOC_Os06g14870	up
LOC_Os11g10920	up
LOC_Os03g62530	up
LOC_Os03g48220	up
LOC_Os10g42620	up
LOC_Os01g74140	up
LOC_Os02g30810	up
LOC_Os07g46730	down
LOC_Os03g41200	down
LOC_Os01g24710	up	OsSalT|OsMBL1
LOC_Os03g61650	up
LOC_Os11g02165	up
LOC_Os01g03670	up
LOC_Os08g24000	up
LOC_Os06g40550	up	OsABCG15
LOC_Os07g25730	down
LOC_Os04g37570	up	OsAP37
LOC_Os03g02700	up
LOC_Os01g56530	up
LOC_Os10g29400	up
LOC_Os12g04230	up
LOC_Os07g23740	up
LOC_Os03g59880	up
LOC_Os07g27140	up
LOC_Os04g37580	up
LOC_Os05g11900	up
LOC_Os12g12170	up
LOC_Os08g34860	up
LOC_Os09g17070	up
LOC_Os03g19220	up
LOC_Os04g33030	up
LOC_Os01g12190	up
LOC_Os03g01170	up
LOC_Os08g32720	up
LOC_Os04g35860	up
LOC_Os08g40440	up
LOC_Os06g34790	up
LOC_Os01g48800	up	BG3
LOC_Os08g03682	up	CYP703A3
LOC_Os01g43940	up
LOC_Os08g20200	up
LOC_Os04g45960	up	OsSub42|OsSP2
LOC_Os12g06440	up
LOC_Os10g42160	up
LOC_Os01g74510	up
LOC_Os12g08564	up
LOC_Os12g02105	up
LOC_Os01g07560	up
LOC_Os02g01980	up
LOC_Os03g41050	down
LOC_Os04g20260	up
LOC_Os09g30320	up	RA8
LOC_Os12g09320	up
LOC_Os10g34480	up
LOC_Os07g41650	up
LOC_Os09g27940	up
LOC_Os04g52320	up
LOC_Os02g16610	up
LOC_Os03g13840	down
LOC_Os08g23880	up
LOC_Os11g45990	up
LOC_Os08g34410	up
LOC_Os03g61249	up
LOC_Os06g41820	up
LOC_Os02g39210	up
LOC_Os11g39780	up
LOC_Os03g57920	up
LOC_Os02g01190	up
LOC_Os01g68560	up
LOC_Os05g46370	up	OsLF
LOC_Os04g39470	up	OsMYB80
LOC_Os10g42080	up
LOC_Os10g10260	up
LOC_Os01g66570	up
LOC_Os01g14880	up
LOC_Os06g41850	up	TGW6
LOC_Os12g05080	up
LOC_Os08g14880	up
LOC_Os03g45220	up
LOC_Os08g28820	up
LOC_Os05g44600	up
LOC_Os01g72520	up
LOC_Os10g30944	up
LOC_Os10g03850	up	OsFbx352
LOC_Os07g40620	up
LOC_Os07g25900	up
LOC_Os10g35160	up
LOC_Os03g43790	up
LOC_Os07g37080	up
LOC_Os07g19540	up
LOC_Os03g61319	up
LOC_Os05g02780	down
LOC_Os09g22460	up
LOC_Os01g19460	up
LOC_Os07g23190	up
LOC_Os09g12590	up
LOC_Os10g18026	up
LOC_Os03g39220	up
LOC_Os09g27620	up	PTC1|OsMS1
LOC_Os11g13750	up
LOC_Os03g49480	up
LOC_Os05g05354	down
LOC_Os07g32680	up
LOC_Os10g10270	up
LOC_Os09g34320	up
LOC_Os04g21590	up
LOC_Os03g56770	up
LOC_Os11g41210	up
LOC_Os09g10260	up
LOC_Os11g07890	up
LOC_Os04g52090	down	OsAP2-39
LOC_Os02g39360	up
LOC_Os02g41650	up	OsPAL
LOC_Os08g45150	up
LOC_Os05g10650	up	OsPPi-PFK
LOC_Os07g32660	up
LOC_Os11g36090	up
LOC_Os09g10270	up
LOC_Os07g28720	up
LOC_Os02g54830	up
LOC_Os07g17184	up
LOC_Os01g04710	up
LOC_Os07g19550	up
LOC_Os02g58290	up
LOC_Os07g22850	up	OsPKS2
LOC_Os11g15670	down
LOC_Os10g34360	up	OsPKS1|YY2|OsLAP6
LOC_Os07g27770	up
LOC_Os10g06770	up
LOC_Os02g48900	up
LOC_Os06g47480	up
LOC_Os05g10560	up
LOC_Os09g10200	up
LOC_Os11g22150	up
LOC_Os03g19452	up
LOC_Os02g36880	up	OMTN1
LOC_Os09g32020	up	OsTKPR1|OsDFR2|OS-DFR2
LOC_Os03g08120	up
LOC_Os08g38470	up
LOC_Os03g22670	up
LOC_Os06g12330	up
LOC_Os11g02180	up
LOC_Os04g40800	up
LOC_Os07g37320	up	OsMST6
LOC_Os03g18820	down	OsXXT1
LOC_Os01g55600	up
LOC_Os02g16620	up
LOC_Os07g40830	up
LOC_Os01g12270	up
LOC_Os07g13370	up
LOC_Os12g22940	up
LOC_Os07g23270	up
LOC_Os06g40770	up
LOC_Os11g02440	up
LOC_Os01g50750	up
LOC_Os03g08360	up	ONI1
LOC_Os07g15160	up
LOC_Os04g33820	down
LOC_Os02g18460	up
LOC_Os03g47460	up
LOC_Os03g05270	up
LOC_Os08g13740	up
LOC_Os03g26920	up
LOC_Os02g02340	up
LOC_Os10g05790	up
LOC_Os06g12910	up
LOC_Os07g18050	down
LOC_Os11g31820	down
LOC_Os12g04500	up
LOC_Os07g09470	up
LOC_Os01g05840	up
LOC_Os07g09010	up
LOC_Os03g55380	up
LOC_Os07g17270	up
LOC_Os08g38080	up
LOC_Os02g19380	up
LOC_Os03g05210	up
LOC_Os02g46030	up
LOC_Os04g08280	up
LOC_Os01g63830	up
LOC_Os05g42000	up
LOC_Os03g39040	up
LOC_Os03g02710	up
LOC_Os09g39410	up
LOC_Os03g26930	up
LOC_Os07g05180	up
LOC_Os02g12700	up
LOC_Os10g35180	up	OsABCG26
LOC_Os04g27950	up
LOC_Os02g02150	up
LOC_Os07g12800	up
LOC_Os03g25660	down
LOC_Os07g26540	up	OsHXK1
LOC_Os02g58370	up
LOC_Os03g09820	up
LOC_Os07g13634	up
LOC_Os01g15229	up
LOC_Os11g33170	up
LOC_Os07g24150	up
LOC_Os01g66590	up	OsIG1
LOC_Os04g31804	up
LOC_Os10g37730	up
LOC_Os03g18470	up
LOC_Os11g10910	up
LOC_Os04g49870	up
LOC_Os01g42810	up
LOC_Os11g02070	up
LOC_Os01g32770	down
LOC_Os05g27749	up
LOC_Os04g42550	up
LOC_Os07g09830	up
LOC_Os06g09450	up
LOC_Os07g25150	up
LOC_Os01g09220	down
LOC_Os01g47100	up
LOC_Os09g13930	up
LOC_Os05g04660	up
LOC_Os04g55240	up
LOC_Os03g11350	up
LOC_Os02g39240	up
LOC_Os03g38120	up
LOC_Os04g35690	up
LOC_Os02g54240	up
LOC_Os04g36040	up
LOC_Os07g17220	up
LOC_Os03g63450	up
LOC_Os12g17690	down
LOC_Os10g17790	up
LOC_Os09g16000	up
LOC_Os10g24954	up
LOC_Os02g29130	down
LOC_Os03g07480	up	OsSUT1
LOC_Os11g28920	up
LOC_Os03g40830	up
LOC_Os08g39000	up
LOC_Os01g61940	up	OsABCG3
LOC_Os06g06490	down
LOC_Os08g24790	up
LOC_Os09g12380	up
LOC_Os08g09770	up	OsBiP5
LOC_Os01g12290	up
LOC_Os02g36340	up
LOC_Os05g45450	up
LOC_Os02g12710	up
LOC_Os12g07840	up
LOC_Os07g35970	up
LOC_Os03g16090	up
LOC_Os01g56010	up
LOC_Os03g12890	up
LOC_Os05g25860	up
LOC_Os02g55480	up
LOC_Os06g47870	up
LOC_Os05g39770	up	Osh36|OsAMTR1
LOC_Os06g48250	up
LOC_Os08g19330	up
LOC_Os07g26000	up
LOC_Os03g04120	up	OsACS
LOC_Os07g27350	down
LOC_Os01g49270	up
LOC_Os12g25350	up
LOC_Os07g12390	up
LOC_Os09g24810	up
LOC_Os05g47670	up
LOC_Os03g27590	up
LOC_Os07g16030	up
LOC_Os02g38260	up	LSSR1
LOC_Os04g27400	down
LOC_Os05g45120	down
LOC_Os07g20100	up
LOC_Os02g58150	down
LOC_Os02g18470	up
LOC_Os06g43520	up
LOC_Os05g35400	up	OsBiP4
LOC_Os03g58300	down	OsIGL|OsIgl
LOC_Os05g02870	up
LOC_Os05g26049	up
LOC_Os05g41630	up
LOC_Os03g08310	down	OsJAZ9|OsTIFY11a
LOC_Os07g09860	up
LOC_Os07g35680	up
LOC_Os05g33150	down	CHIA1;175
LOC_Os05g26026	up
LOC_Os07g35880	up
LOC_Os10g06580	up
LOC_Os05g49900	up	OsCHS
LOC_Os01g37200	down
LOC_Os07g10810	up
LOC_Os01g45400	up
LOC_Os10g41550	up
LOC_Os01g48430	up
LOC_Os07g05120	down
LOC_Os10g42830	up
LOC_Os02g39420	up
LOC_Os06g47270	up	OsDIRP1
LOC_Os03g10478	up
LOC_Os05g46760	down
LOC_Os09g28730	up
LOC_Os03g56490	up
LOC_Os07g13834	up
LOC_Os01g15770	up
LOC_Os01g42400	up
LOC_Os05g45680	up
LOC_Os10g18010	up
LOC_Os06g25439	down
LOC_Os01g56040	up
LOC_Os05g26840	up
LOC_Os02g16770	up
LOC_Os07g09480	up
LOC_Os05g47960	down
LOC_Os08g31130	up
LOC_Os01g72350	up
LOC_Os03g24730	up
LOC_Os06g44660	up
LOC_Os12g36880	up	OsPR10a|PBZ1
LOC_Os07g17180	up
LOC_Os02g33850	up
LOC_Os11g03650	up
LOC_Os01g45274	up	OsCA1|OsbetaCA1
LOC_Os05g06000	up
LOC_Os06g23430	down
LOC_Os03g56890	up
LOC_Os03g51495	up
LOC_Os02g47390	up
LOC_Os07g10330	up
LOC_Os09g16449	up
LOC_Os03g47320	up
LOC_Os02g15560	down
LOC_Os08g38340	up
LOC_Os05g47480	up
LOC_Os03g43100	up
LOC_Os01g62870	up	AKR4C14|OsI_04428|OsAKR2
LOC_Os05g41610	up
LOC_Os06g01250	up	CYP93G2
LOC_Os04g47110	up
LOC_Os02g50570	down
LOC_Os03g39150	up
LOC_Os07g25410	up
LOC_Os01g04409	up
LOC_Os11g30760	up
LOC_Os01g71280	up
LOC_Os09g20390	down	OsTPP7
LOC_Os07g10370	up
LOC_Os08g31580	down	OsERF48|OsDRAP1
LOC_Os06g15760	up
LOC_Os04g44410	up
LOC_Os07g22600	down	OsSPDS1
LOC_Os06g08032	up
LOC_Os11g05614	up
LOC_Os01g45900	up
LOC_Os02g44900	up
LOC_Os07g18930	up
LOC_Os01g12820	up
LOC_Os01g34590	down
LOC_Os01g55510	up
LOC_Os06g07932	up
LOC_Os12g44260	up
LOC_Os01g47730	down
LOC_Os07g23340	up
LOC_Os03g04020	up	EXPLA1
LOC_Os11g03620	up
LOC_Os03g64310	up
LOC_Os07g23485	up
LOC_Os10g40720	up	OsEXPB3
LOC_Os01g73000	up
LOC_Os06g14420	down
LOC_Os10g06800	up
LOC_Os04g24600	up
LOC_Os01g04330	down	OsCML16
LOC_Os07g09740	up
LOC_Os01g34980	up
LOC_Os08g06710	up
LOC_Os09g19710	up
LOC_Os05g01290	up
LOC_Os03g39240	up
LOC_Os12g25090	up	Sci1|PR6
LOC_Os12g13930	up	KAR
LOC_Os01g16130	up
LOC_Os02g57520	up
LOC_Os01g40070	down
LOC_Os01g58420	down	AP37|OsERF3
LOC_Os01g12560	up
LOC_Os05g02720	up
LOC_Os02g41630	up
LOC_Os01g66840	up
LOC_Os10g38050	up	OsNP1
LOC_Os01g09340	up
LOC_Os07g23494	up
LOC_Os10g41580	up
LOC_Os03g35920	up
LOC_Os07g27780	up
LOC_Os05g50920	up
LOC_Os10g33760	up
LOC_Os01g63540	up
LOC_Os10g22520	up	GH5BG
LOC_Os07g27330	up
LOC_Os06g05610	up
LOC_Os07g23660	up	RePRP2.1
LOC_Os03g51640	up
LOC_Os02g37150	down
LOC_Os06g37150	up
LOC_Os12g02640	up
LOC_Os01g10760	up
LOC_Os10g06780	up
LOC_Os01g10400	up	OsMTI-3a
LOC_Os03g39370	up
LOC_Os04g30030	up
LOC_Os08g27210	up
LOC_Os07g27340	up
LOC_Os03g57000	up
LOC_Os03g63060	up
LOC_Os08g27220	up
LOC_Os01g51870	up
LOC_Os01g17050	down
LOC_Os03g55776	down
LOC_Os01g37350	up
LOC_Os03g39050	up
LOC_Os05g30250	up
LOC_Os08g44640	up	OsBISCPL1
LOC_Os09g06770	up
LOC_Os02g48870	up
LOC_Os02g10760	up	OsWR1
LOC_Os02g39430	up
LOC_Os01g55160	down
LOC_Os10g10149	up
LOC_Os07g13234	up
LOC_Os09g32910	down
LOC_Os06g34830	up
LOC_Os05g50000	down
LOC_Os03g25420	up
LOC_Os03g14880	up
LOC_Os08g41780	up
LOC_Os07g23810	up
LOC_Os04g45170	up
LOC_Os01g49640	down
LOC_Os06g47630	up
LOC_Os03g57990	up
LOC_Os05g40270	up
LOC_Os01g65710	up
LOC_Os11g13630	up
LOC_Os01g66970	up
LOC_Os03g29864	up
LOC_Os07g22494	up
LOC_Os02g34650	down
LOC_Os01g51550	up
LOC_Os05g04680	down
LOC_Os10g04800	up
LOC_Os06g11135	up
LOC_Os01g21630	up
LOC_Os07g16960	up
LOC_Os06g40760	up
LOC_Os12g09070	up
LOC_Os05g14260	up
LOC_Os12g36830	up	RSOsPR10|OsPBZ14
LOC_Os09g34930	up
LOC_Os01g51540	up
LOC_Os05g28050	up
LOC_Os08g38810	up	RAFTIN1
LOC_Os06g13839	up
LOC_Os07g12710	up
LOC_Os05g25960	up
LOC_Os07g23930	up
LOC_Os11g06870	up
LOC_Os07g10970	up
LOC_Os12g08760	up
LOC_Os07g35410	up
LOC_Os04g35670	up
LOC_Os06g49000	up
LOC_Os04g57490	up	OsCP1
LOC_Os03g09170	down
LOC_Os11g32780	down
LOC_Os06g10530	up
LOC_Os02g42585	down
LOC_Os07g48450	up
LOC_Os02g29774	up
LOC_Os07g23480	up
LOC_Os09g38480	up
LOC_Os06g15380	up
LOC_Os08g41880	up	NPP1|OsPAP27b
LOC_Os05g39250	down	CRP
LOC_Os01g02130	up
LOC_Os03g40540	up	OsDWARF
LOC_Os10g28210	up
LOC_Os03g64230	up
LOC_Os04g27810	down
LOC_Os01g50420	down	OsNPK1-PK|OsMAPKKK62
LOC_Os11g05390	up	OsENA1
LOC_Os01g57350	up
LOC_Os01g47670	up
LOC_Os03g20420	up
LOC_Os02g39230	up
LOC_Os10g33990	up
LOC_Os01g19450	up
LOC_Os03g25080	up
LOC_Os12g41680	up	OMTN3|OsNAC60
LOC_Os12g38910	up
LOC_Os07g23280	up
LOC_Os01g08670	up
LOC_Os10g33350	up
LOC_Os10g40660	up
LOC_Os02g30620	up
LOC_Os07g10920	up
LOC_Os04g39430	up	D11|CPB1|CYP724B1|GNS4|PMM1
LOC_Os11g35050	down
LOC_Os10g30910	up
LOC_Os06g30430	up
LOC_Os03g36650	up
LOC_Os07g34520	up
LOC_Os07g47640	up
LOC_Os03g01180	up
LOC_Os08g40420	up
LOC_Os06g50230	up
LOC_Os03g60840	up
LOC_Os04g56990	up	RLI1
LOC_Os03g13200	up
LOC_Os03g19070	down
LOC_Os01g55000	up
LOC_Os12g01510	up
ChrSy.fgenesh.gene.32	up
LOC_Os01g66610	up
LOC_Os05g29974	up
LOC_Os04g55560	up	SHAT1
LOC_Os12g03290	up
LOC_Os03g19200	up
LOC_Os01g70600	up
LOC_Os11g05400	up	OsPAP21b
LOC_Os01g63620	down
LOC_Os03g22680	up	OsSRFP1|SDEL2
LOC_Os08g36570	down
LOC_Os02g50900	down
LOC_Os08g04140	up
LOC_Os06g07860	up
LOC_Os03g41920	down
LOC_Os05g26070	up
LOC_Os10g33920	up
LOC_Os08g14350	up
LOC_Os05g09704	up
LOC_Os11g12530	up
LOC_Os01g04440	up
LOC_Os02g04170	up	OsLASPO
LOC_Os10g17930	up
LOC_Os07g32960	up
LOC_Os01g62430	up	Rpp17|OsERG1
LOC_Os04g32110	up
LOC_Os09g27330	down
LOC_Os10g01540	up
LOC_Os02g05470	up
LOC_Os03g07400	up
LOC_Os01g47270	up
LOC_Os12g23950	up
LOC_Os05g04380	up
LOC_Os03g47470	up
LOC_Os04g52810	up
LOC_Os07g33200	down
LOC_Os07g17689	up
LOC_Os02g50690	up
LOC_Os10g37240	up
LOC_Os04g49690	down
LOC_Os08g13000	up
LOC_Os09g03680	up
LOC_Os02g35190	up	OsCLC-2
LOC_Os07g15440	up
LOC_Os03g20910	up	WOX6
LOC_Os07g35340	up
LOC_Os06g11420	up
LOC_Os02g50130	down
LOC_Os11g04660	up
LOC_Os01g71780	up
LOC_Os07g12540	down
LOC_Os02g09400	up
LOC_Os07g35370	up
LOC_Os01g02760	up
LOC_Os01g40170	up
LOC_Os09g30506	down
LOC_Os02g25620	up
LOC_Os11g31090	up
LOC_Os12g04424	up
LOC_Os03g39100	up
LOC_Os10g32444	up
LOC_Os08g05910	up	OsNRT1.1A
LOC_Os03g28980	up
LOC_Os02g03270	up
LOC_Os12g07120	up
LOC_Os01g13610	up
LOC_Os03g03350	up
LOC_Os09g34950	up
LOC_Os08g43050	up
LOC_Os07g37400	down	OsMsr9
LOC_Os05g07740	up
LOC_Os01g56680	up
LOC_Os02g44230	down	OsTPP1
LOC_Os05g15600	up
LOC_Os04g38970	up
LOC_Os03g07510	down	PGL1
LOC_Os09g12720	up
LOC_Os01g41170	down
LOC_Os12g22630	up
LOC_Os01g43320	up
LOC_Os03g12290	down	GLN1;2|GS1;2|OsGS1;2
LOC_Os09g14960	down
LOC_Os03g45390	up
LOC_Os01g64660	down	MOC2|FBP1
LOC_Os04g25900	up
LOC_Os05g45140	down
LOC_Os09g20870	up
LOC_Os12g04360	up
LOC_Os02g50805	up
LOC_Os01g21120	down
LOC_Os01g18120	up
LOC_Os07g42490	up	RSUS3|SUS3
LOC_Os01g14670	up
LOC_Os03g26910	up
LOC_Os09g08390	down
LOC_Os11g05530	up
LOC_Os03g47890	up
LOC_Os11g02054	up
LOC_Os07g23030	up
LOC_Os07g20164	up
LOC_Os01g02190	up
LOC_Os08g19670	down
LOC_Os07g18980	up
LOC_Os02g56334	up
LOC_Os03g28990	up
LOC_Os10g06560	up
LOC_Os02g04250	up
LOC_Os11g02330	up
LOC_Os09g36280	up
LOC_Os06g03800	up
LOC_Os07g12570	up
LOC_Os07g04370	up
LOC_Os08g39030	up
LOC_Os06g06170	up
LOC_Os01g37920	up
LOC_Os11g35310	up
LOC_Os06g37330	down	OsKOS4|OsKO1
LOC_Os03g52410	down
LOC_Os05g40590	up
LOC_Os04g35660	up
LOC_Os11g37280	down	OsC6
LOC_Os02g30170	down
LOC_Os07g37850	up
LOC_Os07g39990	up
LOC_Os02g25020	up
LOC_Os06g05950	up
LOC_Os01g02150	up
LOC_Os07g15370	down	OsNRAMP5
LOC_Os12g21930	up
LOC_Os07g18944	up
LOC_Os09g39610	up
LOC_Os02g01930	up
LOC_Os10g37760	down
LOC_Os09g27950	up
LOC_Os11g14900	up
LOC_Os02g54060	down
LOC_Os10g06950	up
LOC_Os09g32025	up
LOC_Os03g04360	down	OsPht1;7|OsPT7
LOC_Os06g39470	up
LOC_Os04g32920	up	OsHAK1
LOC_Os06g13999	up
LOC_Os09g08720	up
LOC_Os06g11840	up	OsTPP2
LOC_Os11g30560	up	OsHSD1|LGF1
LOC_Os01g42540	up
LOC_Os11g47809	up	OsMT1a|rgMT
LOC_Os01g58850	down
LOC_Os06g37680	down
LOC_Os09g16458	up
LOC_Os03g53210	up
LOC_Os07g23944	down
LOC_Os12g31890	up
LOC_Os09g17560	up
LOC_Os02g04570	down
LOC_Os07g12770	up
LOC_Os06g37560	up	OsBGal2
LOC_Os02g31160	up
LOC_Os12g39640	up
LOC_Os03g25490	up
LOC_Os04g58480	down
LOC_Os09g16280	up
LOC_Os01g60280	up
LOC_Os06g02210	up
LOC_Os04g45140	up
LOC_Os04g56100	up
LOC_Os01g05585	up	OsMT2d
LOC_Os11g03540	up
LOC_Os07g10380	up
LOC_Os01g70110	up
LOC_Os07g10960	up
LOC_Os08g14310	up
LOC_Os01g37360	up
LOC_Os09g28040	up
LOC_Os01g69050	up
LOC_Os05g28140	up
LOC_Os02g13600	up
LOC_Os06g27560	up
LOC_Os01g60740	up	Psd1
LOC_Os04g32050	up	OsYSL6
LOC_Os11g44870	up
LOC_Os07g46380	up
LOC_Os01g18320	up
LOC_Os12g06660	up
LOC_Os07g26630	up	OsPIP2;4
LOC_Os01g52770	up
LOC_Os05g31620	down
LOC_Os03g01880	up
LOC_Os05g09500	up	OsHXK7
LOC_Os01g45720	down
LOC_Os08g34360	up
LOC_Os11g46000	up

## Sheet: Table S10
Table S10 Meiosis related gene set
Gene_id	GeneName	Refference
LOC_Os12g42760	OsSpo11-4|OsSPO11D	[31]
LOC_Os09g01680	OsRAD51D	[30]
LOC_Os02g53680	OsRPA1a	[31]
LOC_Os04g44620	OsHUS1	[84]
LOC_Os03g44760	OsAM1	[31]; [41]
LOC_Os07g36330		[35]
LOC_Os01g39710		[35]
LOC_Os07g08600		[35]
LOC_Os05g45500		[35]
LOC_Os03g50790		[35]
LOC_Os03g30590		[35]
LOC_Os05g40590		[35]
LOC_Os05g14360		[35]
LOC_Os07g22680		[35]
LOC_Os01g58730		[35]
LOC_Os01g54950		[35]
LOC_Os09g06680		[35]
LOC_Os03g30620		[35]
LOC_Os02g17340		[35]
LOC_Os01g06430		[35]
LOC_Os08g09720		[35]
LOC_Os07g02470		[35]
LOC_Os06g06670		[35]
LOC_Os07g43230		[35]
LOC_Os05g43960		[35]
LOC_Os12g38960		[35]
LOC_Os03g14790		[35]
LOC_Os01g06420		[35]
LOC_Os03g59840		[35]
LOC_Os01g06390		[35]
LOC_Os08g17510		[35]
LOC_Os01g68250		[35]
LOC_Os06g07470		[35]
LOC_Os01g50280		[35]
LOC_Os02g04900		[35]
LOC_Os11g08600		[35]
LOC_Os02g05600		[35]
LOC_Os03g30680		[35]
LOC_Os01g19280		[35]
LOC_Os04g54730		[35]
LOC_Os07g39950		[35]
LOC_Os01g14210		[35]
LOC_Os01g22039		[35]
LOC_Os05g40500		[35]
LOC_Os05g40610		[35]
LOC_Os01g67260		[35]
LOC_Os04g41070		[35]
LOC_Os01g14350		[35]
LOC_Os03g55164	OsWRKY4	[35]
LOC_Os12g38790		[35]
LOC_Os02g08530		[35]
LOC_Os06g06710		[35]
LOC_Os06g06680		[35]
LOC_Os02g38710		[35]
LOC_Os01g14340		[35]
LOC_Os07g03760		[35]
LOC_Os07g04650		[35]
LOC_Os04g41050		[35]
LOC_Os07g49290		[35]
LOC_Os02g10110		[35]
LOC_Os05g40250		[35]
LOC_Os10g27390		[35]
LOC_Os04g44730		[35]
LOC_Os12g05750		[35]
LOC_Os01g61210		[35]
LOC_Os04g42360		[35]
LOC_Os11g38230		[35]
LOC_Os02g32180		[35]
LOC_Os03g14700		[35]
LOC_Os12g04760		[35]
LOC_Os03g51100		[35]
LOC_Os05g43050		[35]
LOC_Os10g42800		[35]
LOC_Os09g37380		[35]
LOC_Os01g50300		[35]
LOC_Os08g16710		[35]
LOC_Os03g62522		[35]
LOC_Os04g39960		[35]
LOC_Os09g33730		[35]
LOC_Os03g30660		[35]
LOC_Os01g13830		[35]
LOC_Os02g28970	OsMTR1	[35]; [10]
LOC_Os07g36340		[35]; [10]
LOC_Os12g42330		[35]; [10]
LOC_Os03g18480	OsTDF1	[35]; [10]
LOC_Os10g29880		[35]; [10]
LOC_Os04g52550		[35]; [10]
LOC_Os05g46050		[35]; [10]
LOC_Os06g48920		[35]; [10]
LOC_Os03g13360		[35]; [10]
LOC_Os01g56740		[35]; [10]
LOC_Os01g06440		[35]; [10]
LOC_Os08g16690		[35]; [10]
LOC_Os11g38630		[35]; [10]
LOC_Os01g06380		[35]; [10]
LOC_Os02g33840		[35]; [10]
LOC_Os03g18470		[35]; [10]
LOC_Os01g14310		[35]; [10]
LOC_Os06g44240		[35]; [10]
LOC_Os11g04800		[35]; [10]
LOC_Os01g06400		[35]; [10]
LOC_Os05g05510		[35]; [10]
LOC_Os02g18870		[35]; [10]
LOC_Os05g46060		[35]; [10]
LOC_Os08g04250		[35]; [10]
LOC_Os07g08540		[35]; [10]
LOC_Os03g30690		[35]; [10]
LOC_Os01g14220		[35]; [10]
LOC_Os04g32160		[35]; [10]
LOC_Os05g50020		[35]; [10]
LOC_Os10g21490		[35]; [10]
LOC_Os04g35630		[35]; [10]
LOC_Os08g03300		[35]; [10]
LOC_Os08g16700		[35]; [10]
LOC_Os12g40320		[35]; [10]
LOC_Os05g46160		[35]; [10]
LOC_Os07g08650		[35]; [34]
LOC_Os07g49220		[35]; [34]
LOC_Os05g40550		[35]; [34]
LOC_Os03g51180		[35]; [34]
LOC_Os12g41450		[35]; [34]
LOC_Os08g06730		[35]; [34]
LOC_Os11g47530		[35]; [4]
LOC_Os12g38950		[35]; [20]
LOC_Os10g42060		[35]; [20]
LOC_Os05g40240		[35]; [20]
LOC_Os12g04980	DMC1A|DMC1	[31]; [41]
LOC_Os09g31390	OsTGA10	[26]
LOC_Os12g32450		[26]
LOC_Os10g26890		[26]
LOC_Os12g05760		[26]
LOC_Os02g03320		[26]
LOC_Os04g34710		[26]
LOC_Os07g39640		[26]
LOC_Os06g07987		[26]
LOC_Os08g06890		[26]
LOC_Os05g06220		[26]
LOC_Os12g39470		[26]
LOC_Os01g49650		[26]
LOC_Os04g29310		[26]
LOC_Os07g32170	OsSPL13	[26]
LOC_Os03g47490		[26]
LOC_Os11g10940		[26]
LOC_Os11g10890		[26]
LOC_Os10g34430	OsDCL3b	[26]
LOC_Os02g39240		[26]
LOC_Os05g06560		[26]
LOC_Os06g41320		[26]
LOC_Os09g16449		[26]
LOC_Os05g47480		[26]
LOC_Os06g16610		[26]
LOC_Os09g11260		[26]
LOC_Os11g10880		[26]
LOC_Os07g10570	RP6	[26]
LOC_Os12g26380		[26]
LOC_Os07g05150		[26]
LOC_Os11g38780		[26]
LOC_Os09g16458		[26]
LOC_Os09g11990		[26]
LOC_Os08g34360		[26]
LOC_Os02g39430		[26]
LOC_Os01g47180		[26]
LOC_Os03g51556		[26]
LOC_Os02g57760		[26]
LOC_Os06g06660		[26]
LOC_Os07g16270		[26]
LOC_Os06g41290		[26]
LOC_Os10g29750		[26]
LOC_Os08g43240		[26]
LOC_Os05g13630		[26]
LOC_Os11g41210		[26]
LOC_Os06g51310	OsAGO1d	[26]
LOC_Os05g49790		[26]
LOC_Os12g14310		[26]
LOC_Os07g33390		[26]
LOC_Os04g26240		[26]
LOC_Os12g34780		[26]
LOC_Os04g29390		[26]
LOC_Os10g22820		[26]
LOC_Os07g12310		[26]
LOC_Os11g16680		[26]
LOC_Os03g02700		[26]
LOC_Os12g03790		[26]
LOC_Os08g44470		[26]
LOC_Os11g16910		[26]
LOC_Os11g40890		[26]
LOC_Os08g38470		[26]
LOC_Os04g46160		[26]
LOC_Os04g55850		[26]
LOC_Os07g15940		[26]
LOC_Os07g26500		[26]
LOC_Os04g26110		[26]
LOC_Os09g21620		[26]
LOC_Os06g16590		[26]
LOC_Os03g56974		[26]
LOC_Os05g28140		[26]
LOC_Os02g29130		[26]
LOC_Os01g17402		[26]
LOC_Os11g27030		[26]
LOC_Os06g02360		[26]
LOC_Os11g39559		[26]
LOC_Os11g40870		[26]
LOC_Os02g01190		[26]
LOC_Os09g21580		[26]
LOC_Os01g41834		[26]
LOC_Os04g38840		[26]
LOC_Os05g41870		[26]
LOC_Os05g06240		[26]
LOC_Os12g30070		[26]
LOC_Os03g45270		[26]
LOC_Os09g30270		[26]
LOC_Os07g10580		[26]
LOC_Os11g41330		[26]
LOC_Os10g42490		[26]
LOC_Os04g25230		[26]
LOC_Os08g01420	Ehd3	[26]
LOC_Os05g03110		[26]
LOC_Os03g11350		[26]
LOC_Os04g58360		[26]
LOC_Os06g09430		[26]
LOC_Os08g30340		[26]
LOC_Os04g26120		[26]
LOC_Os04g44740		[26]
LOC_Os04g49920		[26]
LOC_Os02g34060		[26]
LOC_Os01g12020		[26]
LOC_Os11g39520		[26]
LOC_Os12g34560		[26]
LOC_Os05g06190		[26]
LOC_Os12g38900		[26]
LOC_Os09g31450		[26]
LOC_Os06g41820		[26]
LOC_Os08g05080		[26]
LOC_Os04g29680		[26]
LOC_Os06g40880		[26]
LOC_Os05g12000		[26]
LOC_Os05g42390		[26]
LOC_Os08g09360		[26]
LOC_Os06g37690		[26]
LOC_Os09g15050	OsCPS3	[26]
LOC_Os03g61290		[26]
LOC_Os10g29840		[26]
LOC_Os06g16650		[26]
LOC_Os06g16500		[26]
LOC_Os05g46390		[26]
LOC_Os11g10730		[26]
LOC_Os04g25140		[26]
LOC_Os09g36380		[26]
LOC_Os01g65710		[26]
LOC_Os03g24300		[26]
LOC_Os01g45400		[26]
LOC_Os05g27760		[26]
LOC_Os06g07887		[26]
LOC_Os02g34100		[26]
LOC_Os04g30470		[26]; [35]
LOC_Os09g01670		[26]; [35]
LOC_Os02g32190		[26]; [35]
LOC_Os07g08530		[26]; [35]; [34]
LOC_Os07g04580	OsC3H47	[26]; [35]; [34]; [10]
LOC_Os11g03520		[26]; [35]; [34]; [20]
LOC_Os04g50850		[26]; [35]; [20]
LOC_Os02g28870		[26]; [35]; [20]
LOC_Os09g16010		[26]; [35]; [20]; [10]
LOC_Os01g50750		[26]; [10]
LOC_Os03g23050		[26]; [10]
LOC_Os12g33194		[26]; [10]
LOC_Os10g17790		[26]; [10]
LOC_Os03g47460		[26]; [10]
LOC_Os09g10230		[26]; [10]
LOC_Os10g42080		[26]; [10]
LOC_Os03g26920		[26]; [10]
LOC_Os01g40170		[26]; [10]
LOC_Os05g28050		[26]; [10]
LOC_Os08g05620		[26]; [10]
LOC_Os12g12170		[26]; [10]
LOC_Os01g43940		[26]; [10]
LOC_Os03g48220		[26]; [10]
LOC_Os06g41150		[26]; [10]
LOC_Os06g41830		[26]; [10]
LOC_Os11g05390	OsENA1	[26]; [10]
LOC_Os06g37680		[26]; [10]
LOC_Os06g41850	TGW6	[26]; [10]
LOC_Os01g43320		[26]; [10]
LOC_Os08g06690		[26]; [34]
LOC_Os08g06700		[26]; [34]
LOC_Os04g48400	HTH1	[26]; [34]
LOC_Os07g22850	OsPKS2	[26]; [34]; [20]
LOC_Os06g23360		[26]; [34]; [20]; [10]
LOC_Os12g14440	OsJAC1	[26]; [4]
LOC_Os09g10270		[26]; [4]
LOC_Os04g37570	OsAP37	[26]; [4]
LOC_Os09g10200		[26]; [4]
LOC_Os09g27940		[26]; [4]
LOC_Os02g13600		[26]; [4]
LOC_Os08g20200		[26]; [4]
LOC_Os03g26650		[26]; [4]
LOC_Os09g22460		[26]; [4]
LOC_Os08g39000		[26]; [4]
LOC_Os11g39609		[26]; [4]
LOC_Os02g24740		[26]; [4]
LOC_Os01g10760		[26]; [4]
LOC_Os11g10920		[26]; [4]
LOC_Os07g05180		[26]; [4]
LOC_Os01g14030		[26]; [4]; [10]
LOC_Os03g55960		[26]; [4]; [10]
LOC_Os05g10420		[26]; [4]; [10]
LOC_Os03g40830		[26]; [4]; [10]
LOC_Os01g70600		[26]; [4]; [10]
LOC_Os04g52320		[26]; [4]; [10]
LOC_Os03g02670		[26]; [4]; [10]
LOC_Os12g36750		[26]; [4]; [10]
LOC_Os04g08280		[26]; [4]; [20]
LOC_Os05g04660		[26]; [4]; [20]
LOC_Os10g38050	OsNP1	[26]; [4]; [20]
LOC_Os01g03670		[26]; [4]; [20]; [10]
LOC_Os02g01980		[26]; [4]; [20]; [10]
LOC_Os03g47896		[26]; [4]; [20]; [10]
LOC_Os08g27210		[26]; [4]; [20]; [10]
LOC_Os07g37090	OSRIP18	[26]; [4]; [20]; [10]
LOC_Os11g06870		[26]; [20]
LOC_Os01g55600		[26]; [20]
LOC_Os08g34210	OsGAPDH	[26]; [20]
LOC_Os04g24530	OsACOS12	[26]; [20]
LOC_Os09g36490		[26]; [20]
LOC_Os06g12330		[26]; [20]
LOC_Os07g05110		[26]; [20]
LOC_Os01g70025	DPW2	[26]; [20]
LOC_Os02g57520	PTC2	[26]; [20]
LOC_Os05g50920		[26]; [20]
LOC_Os03g11760		[26]; [20]
LOC_Os05g41630		[26]; [20]
LOC_Os01g42810		[26]; [20]; [10]
LOC_Os05g05920		[26]; [20]; [10]
LOC_Os01g68560		[26]; [20]; [10]
LOC_Os04g27950		[26]; [20]; [10]
LOC_Os03g15710	OsSTRL2	[26]; [20]; [10]
LOC_Os02g30060		[26]; [20]; [10]
LOC_Os02g38260	LSSR1	[26]; [20]; [10]
LOC_Os04g39470	OsMYB80	[26]; [20]; [10]
LOC_Os08g40440		[26]; [20]; [10]
LOC_Os06g40550	OsABCG15	[26]; [20]; [10]
LOC_Os04g40874	OsG6PDH2	[26]; [20]; [10]
LOC_Os04g35690		[26]; [20]; [10]
LOC_Os03g57920		[26]; [20]; [10]
LOC_Os03g56890		[26]; [20]; [10]
LOC_Os07g40620		[26]; [20]; [10]
LOC_Os09g13930		[26]; [20]; [10]
LOC_Os04g21590		[26]; [20]; [10]
LOC_Os12g41640		[26]; [20]; [10]
LOC_Os07g40830		[26]; [20]; [10]
LOC_Os07g36460	Udt1	[41]
LOC_Os06g40570	Osnop	[41]
LOC_Os07g43010	DTM1	[41]
LOC_Os10g33250	WDA1	[41]
LOC_Os12g28750	OsTDL1A|MIL2	[41]
LOC_Os01g10504	OSMADS3	[41]
LOC_Os08g06480	OsTPL|ASP1|OsLIS-L1	[41]
LOC_Os12g03822	RIP1	[41]
LOC_Os07g49390	Mtr1	[41]
LOC_Os09g38030	OsUgp1|Ugp1|UGPase1	[41]
LOC_Os01g16810	CSA	[41]
LOC_Os02g02560	OsUgp2|Ugp2	[41]
LOC_Os02g02820	TDR	[41]
LOC_Os02g20930	OsAPI5	[41]
LOC_Os04g57490	OsCP1	[41]
LOC_Os01g59660	OsMYBGA|OsGAMYB	[41]
LOC_Os01g68870	OsMSP1	[41]; [26]
LOC_Os03g07140	DPW	[41]; [26]; [4]; [20]
LOC_Os08g03682	CYP703A3	[41]; [26]; [20]; [10]
LOC_Os03g07250	CYP704B2	[41]; [10]
LOC_Os01g70440	RTS	[41]; [34]
LOC_Os11g37280	OsC6	[41]; [4]
LOC_Os09g27620	PTC1|OsMS1	[41]; [4]; [10]
LOC_Os08g38810	RAFTIN1	[41]; [20]; [10]
LOC_Os04g39080	MOF	[77]
LOC_Os07g05630	OsGRX19|MIL1	[31]; [41]
LOC_Os06g04190	OsRAD1	[85]
LOC_Os03g05040	MEICA1	[86]
LOC_Os06g41050	OsCOM1	[31]; [41]
LOC_Os04g54340	OsMRE11	[31]
LOC_Os01g08540		[27]
LOC_Os04g53760		[27]
LOC_Os11g08660		[27]
LOC_Os02g37920	OsPMS1	[27]
LOC_Os11g26910		[27]
LOC_Os03g33580		[27]
LOC_Os02g48010		[27]
LOC_Os04g58630		[27]
LOC_Os08g21350		[27]
LOC_Os07g12910		[27]
LOC_Os03g50230		[27]
LOC_Os08g44350	OHP1|OsAHP1	[27]
LOC_Os05g09620		[27]
LOC_Os01g67740		[27]
LOC_Os05g19270		[27]
LOC_Os06g03682		[27]
LOC_Os08g06050	TOP6A2|OsTOP6A2	[27]
LOC_Os01g71960	OsMUS81	[27]
LOC_Os11g19250		[27]
LOC_Os06g13020	OsPollambda	[27]
LOC_Os02g04040		[27]
LOC_Os09g39400	OHP2|OsAHP2	[27]
LOC_Os01g72880	OsMLH1	[27]
LOC_Os12g03130		[27]
LOC_Os02g48790		[27]
LOC_Os02g10020		[27]
LOC_Os04g41110	OsRAD21-2	[27]
LOC_Os10g34580		[27]
LOC_Os02g31290		[27]
LOC_Os12g44390		[27]
LOC_Os01g42880		[27]
LOC_Os11g03430		[27]
LOC_Os01g68930		[27]
LOC_Os02g42230		[27]
LOC_Os02g32570		[27]
LOC_Os04g09800		[27]
LOC_Os05g51790		[27]
LOC_Os07g31300		[27]
LOC_Os12g40890		[27]
LOC_Os04g40940		[27]
LOC_Os11g07050		[27]; [10]
LOC_Os02g29464		[27]; [20]
LOC_Os01g39630	RAD51C	[31]
LOC_Os01g56940	OsEXO1	[87]
LOC_Os03g12414	SDS|OsSDS	[31]; [41]; [10]
LOC_Os06g47830	RPA2c	[31]
LOC_Os05g02040	RPA1c	[31]
LOC_Os11g31090		[10]
LOC_Os07g37690		[10]
LOC_Os06g05000		[10]
LOC_Os11g31250		[10]
LOC_Os02g41450		[10]
LOC_Os06g13210		[10]
LOC_Os06g38510		[10]
LOC_Os01g11880		[10]
LOC_Os02g10850		[10]
LOC_Os05g29920		[10]
LOC_Os04g02160		[10]
LOC_Os06g06620		[10]
LOC_Os02g46100		[10]
LOC_Os06g50930		[10]
LOC_Os06g13999		[10]
LOC_Os08g09020		[10]
LOC_Os06g40784		[10]
LOC_Os07g39320	Oshox14	[10]
LOC_Os07g09740		[10]
LOC_Os05g51470		[10]
LOC_Os09g32840	OsPAP2	[10]
LOC_Os01g07420		[10]
LOC_Os08g34040		[10]
LOC_Os04g57200		[10]
LOC_Os02g02330		[10]
LOC_Os03g14880		[10]
LOC_Os08g10010		[10]
LOC_Os07g36060		[10]
LOC_Os07g49310	OsFAD8	[10]
LOC_Os04g58320		[10]
LOC_Os04g31610		[10]
LOC_Os01g74020	OsPCL1	[10]
LOC_Os02g54240		[10]
LOC_Os01g04350		[10]
LOC_Os03g14654		[10]
LOC_Os02g41860		[10]
LOC_Os12g23450		[10]
LOC_Os06g11420		[10]
LOC_Os10g06800		[10]
LOC_Os06g08380	GSL5|OsGSL5	[10]
LOC_Os03g15920		[10]
LOC_Os07g10880		[10]
LOC_Os09g35800		[10]
LOC_Os02g41460		[10]
LOC_Os04g02640		[10]
LOC_Os01g51870		[10]
LOC_Os03g18950		[10]
LOC_Os11g27799		[10]
LOC_Os05g05210		[10]
LOC_Os04g30490		[10]
LOC_Os05g01290		[10]
LOC_Os05g01380	OsPGIP1	[10]
LOC_Os08g36860	OsABA8ox2|OsCYP707A6	[10]
LOC_Os07g26940	ORMDL	[10]
LOC_Os01g46390		[10]
LOC_Os03g63310		[10]
LOC_Os04g36040		[10]
LOC_Os03g58890		[10]
LOC_Os03g28170		[10]
LOC_Os04g34080		[10]
LOC_Os02g34970		[10]
LOC_Os02g15860		[10]
LOC_Os06g38950		[10]
LOC_Os03g58850		[10]
LOC_Os12g09070		[10]
LOC_Os07g39960		[10]
LOC_Os09g32100		[10]
LOC_Os02g44230	OsTPP1	[10]
LOC_Os06g42660		[10]
LOC_Os05g06000		[10]
LOC_Os07g09730		[10]
LOC_Os07g27340		[10]
LOC_Os01g45420		[10]
LOC_Os03g19560		[10]
LOC_Os02g37834		[10]
LOC_Os01g40240		[10]
LOC_Os01g24030		[10]
LOC_Os02g44235		[10]
LOC_Os07g09625		[10]
LOC_Os03g25690		[10]
LOC_Os02g46980		[10]
LOC_Os09g34190		[10]
LOC_Os02g06930		[10]
LOC_Os02g14190		[10]
LOC_Os08g41650		[10]
LOC_Os05g35290		[10]
LOC_Os08g27220		[10]
LOC_Os03g19380	OsCP12	[10]
LOC_Os10g40450		[10]
LOC_Os06g45540	GL6|SG6	[10]
LOC_Os05g32090		[10]
LOC_Os05g50000		[10]
LOC_Os09g37967		[10]
LOC_Os03g53860		[10]
LOC_Os06g23350		[10]
LOC_Os03g61150		[10]
LOC_Os04g32190		[10]
LOC_Os11g20370		[10]
LOC_Os12g06550		[10]
LOC_Os09g28720		[10]
LOC_Os06g43520		[10]
LOC_Os07g47310		[10]
LOC_Os02g55270		[10]
LOC_Os01g56750		[10]
LOC_Os10g35070		[10]
LOC_Os10g03560		[10]
LOC_Os03g05210		[10]
LOC_Os06g22060		[10]
LOC_Os03g27019		[10]
LOC_Os07g35970		[10]
LOC_Os03g22050		[10]
LOC_Os03g12570	OsCMT3b	[10]
LOC_Os12g08810	OsGGP	[10]
LOC_Os07g35260		[10]
LOC_Os04g47860	OsIDD10	[10]
LOC_Os12g05620		[10]
LOC_Os09g35810		[10]
LOC_Os01g19820		[10]
LOC_Os02g04220		[10]
LOC_Os01g13850		[10]
LOC_Os08g43490		[10]
LOC_Os03g16090		[10]
LOC_Os10g05860		[10]
LOC_Os06g05930		[10]
LOC_Os07g37550		[10]
LOC_Os09g15580		[10]
LOC_Os08g23950		[10]
LOC_Os10g25130	AlaAT|OsAlaAT1	[10]
LOC_Os11g07922		[10]
LOC_Os02g12710		[10]
LOC_Os03g52380		[10]
LOC_Os09g24590		[10]
LOC_Os05g11580		[10]
LOC_Os08g12410		[10]
LOC_Os04g13010		[10]
LOC_Os02g48950		[10]
LOC_Os04g46350		[10]
LOC_Os07g34840		[10]
LOC_Os02g53440		[10]
LOC_Os06g46950	CCD1	[10]
LOC_Os12g32610		[10]
LOC_Os06g14540		[10]
LOC_Os04g43800		[10]
LOC_Os12g42910		[10]
LOC_Os01g04710		[10]
LOC_Os07g36860		[10]
LOC_Os07g09470		[10]
LOC_Os01g12800		[10]
LOC_Os12g29960		[10]
LOC_Os08g19330		[10]
LOC_Os02g32310		[10]
LOC_Os01g18320		[10]
LOC_Os04g32210		[10]
LOC_Os11g05200		[10]
LOC_Os01g68210		[10]
LOC_Os09g28730		[10]
LOC_Os01g56810		[10]
LOC_Os05g25960		[10]
LOC_Os03g09070		[10]
LOC_Os04g02530		[10]
LOC_Os11g37360		[10]
LOC_Os04g53210	GLO2	[10]
LOC_Os02g39420		[10]
LOC_Os02g11700		[10]
LOC_Os05g15300		[10]
LOC_Os03g51440		[10]
LOC_Os01g42860	OCPI1	[10]
LOC_Os04g34460	OsFBN5	[10]
LOC_Os09g27550		[10]
LOC_Os01g05840		[10]
LOC_Os02g39330		[10]
LOC_Os02g16610		[10]
LOC_Os04g54220		[10]
LOC_Os03g49440		[10]
LOC_Os07g37454		[10]
LOC_Os01g61610		[10]
LOC_Os03g27230		[10]
LOC_Os03g63370		[10]
LOC_Os07g38440	DAO	[10]
LOC_Os02g45710		[10]
LOC_Os06g06120		[10]
LOC_Os06g39520		[10]
LOC_Os03g45960		[10]
LOC_Os01g63050		[10]
LOC_Os04g52970		[10]
LOC_Os01g51550		[10]
LOC_Os11g39220	OsACX2	[10]
LOC_Os03g20090	Osmyb2	[10]
LOC_Os03g11210		[10]
LOC_Os05g08620		[10]
LOC_Os01g07410		[10]
LOC_Os04g46290		[10]
LOC_Os01g69910		[10]
LOC_Os11g13890	ASCAB9-A|CP26|Lhcb5	[10]
LOC_Os12g14520		[10]
LOC_Os06g11290	OsOPR1	[10]
LOC_Os04g49210		[10]
LOC_Os12g01760		[10]
LOC_Os07g08390		[10]
LOC_Os04g09680		[10]
LOC_Os07g08400		[10]
LOC_Os04g20260		[10]
LOC_Os07g10360		[10]
LOC_Os03g14170		[10]
LOC_Os03g19920		[10]
LOC_Os04g32200		[10]
LOC_Os01g61044		[10]
LOC_Os10g39100		[10]
LOC_Os10g27330		[10]
LOC_Os01g72690		[10]
LOC_Os08g10020		[10]
LOC_Os03g42130		[10]
LOC_Os03g03570		[10]
LOC_Os01g04920	OsSQD2|OsSQD2.2	[10]
LOC_Os07g05570		[10]
LOC_Os06g08750		[10]
LOC_Os12g05280		[10]
LOC_Os05g14260		[10]
LOC_Os12g36240		[10]
LOC_Os01g31690		[10]
LOC_Os11g10480	Adh1	[10]
LOC_Os06g03670		[10]
LOC_Os03g12820	OsSRO1c	[10]
LOC_Os04g23440		[10]
LOC_Os03g17870		[10]
LOC_Os03g11420	Os3BGlu6	[10]
LOC_Os01g13870		[10]
LOC_Os11g30500		[10]
LOC_Os01g09830		[10]
LOC_Os04g44910		[10]
LOC_Os08g31630		[10]
LOC_Os09g34890		[10]
LOC_Os11g38640		[10]
LOC_Os08g30510		[10]
LOC_Os10g05840		[10]
LOC_Os05g43800		[10]
LOC_Os01g59930		[10]
LOC_Os05g46170		[10]
LOC_Os01g03100		[10]
LOC_Os01g66830		[10]
LOC_Os09g32025	Ostkpr1;OsDFR2A	[10]
LOC_Os03g45280		[10]
LOC_Os01g61240		[10]
LOC_Os11g29290	HAN1	[10]
LOC_Os06g50400		[10]
LOC_Os01g65630		[10]
LOC_Os10g28060	ONI2	[10]
LOC_Os02g36950		[10]
LOC_Os05g33150	CHIA1;175	[10]
LOC_Os01g73110		[10]
LOC_Os12g42950		[10]
LOC_Os03g05750		[10]
LOC_Os06g05200		[10]
LOC_Os03g08580		[10]
LOC_Os09g16000		[10]
LOC_Os01g49310		[10]
LOC_Os08g09770	OsBiP5	[10]
LOC_Os08g14440		[10]
LOC_Os03g08470	OsRAF|OsLG3	[10]
LOC_Os12g42930		[10]
LOC_Os07g36800		[10]
LOC_Os02g37480		[10]
LOC_Os04g57550		[10]
LOC_Os03g53540		[10]
LOC_Os09g22530		[10]
LOC_Os03g60430	OsIDS1	[10]
LOC_Os11g10710		[10]
LOC_Os02g49240		[10]
LOC_Os12g40370		[10]
LOC_Os05g37470	OsAUX3	[10]
LOC_Os06g14810		[10]
LOC_Os06g44660		[10]
LOC_Os06g15760		[10]
LOC_Os08g03420		[10]
LOC_Os11g10750		[10]
LOC_Os10g06510		[10]
LOC_Os06g48020		[10]
LOC_Os11g05530		[10]
LOC_Os05g48770		[10]
LOC_Os01g47400		[10]
LOC_Os02g02400	OsCATA	[10]
LOC_Os06g45020		[10]
LOC_Os01g74300	OsMTI2B	[10]
LOC_Os05g49770		[10]
LOC_Os08g38340		[10]
LOC_Os03g34310		[10]
LOC_Os07g33770		[10]
LOC_Os03g39610	LHCB|LHCPII	[10]
LOC_Os08g31030		[10]
LOC_Os03g09230		[10]
LOC_Os01g14140		[10]
LOC_Os06g04870		[10]
LOC_Os02g09740		[10]
LOC_Os07g01180		[10]
LOC_Os07g18750		[10]
LOC_Os03g63350		[10]
LOC_Os09g34930		[10]
LOC_Os11g22650		[10]
LOC_Os03g64340		[10]
LOC_Os02g49230	DTH2|OsCOL9|OsCCT08	[10]
LOC_Os12g36830	RSOsPR10|OsPBZ14	[10]
LOC_Os07g09840		[10]
LOC_Os08g01610		[10]
LOC_Os01g66350		[10]
LOC_Os09g32810		[10]
LOC_Os04g14710		[10]
LOC_Os03g11270		[10]
LOC_Os10g42072		[10]
LOC_Os07g08510		[10]
LOC_Os05g10480		[10]
LOC_Os07g07860		[10]
LOC_Os03g47610		[10]
LOC_Os03g33090	Os-LBD37	[10]
LOC_Os10g06560		[10]
LOC_Os09g20390	OsTPP7	[10]
LOC_Os01g34790		[10]
LOC_Os08g40450		[10]
LOC_Os01g48960	OsNADH-GOGAT1	[10]
LOC_Os06g11720		[10]
LOC_Os08g30660		[10]
LOC_Os02g37180		[10]
LOC_Os02g33420		[10]
LOC_Os03g01170		[10]
LOC_Os07g09020		[10]
LOC_Os01g58910		[10]
LOC_Os06g06290		[10]
LOC_Os05g41120		[10]
LOC_Os03g48180	OsNPF2.4	[10]
LOC_Os10g30910		[10]
LOC_Os08g36910	alphaAmy3|OsAmy3D|RAmy3D	[10]
LOC_Os02g51080	LYL1|OsChlP|OsGGR	[10]
LOC_Os10g38060	OsPLDbeta1	[10]
LOC_Os12g41140		[10]
LOC_Os12g05260	OsPSK5	[10]
LOC_Os03g25080		[10]
LOC_Os03g51080		[10]
LOC_Os05g46520		[10]
LOC_Os10g12200		[10]
LOC_Os11g05614		[10]
LOC_Os03g55250		[10]
LOC_Os03g26930		[10]
LOC_Os03g26420		[10]
LOC_Os11g31900		[10]
LOC_Os07g06830		[10]
LOC_Os01g41710	CAB2R	[10]
LOC_Os03g38359		[10]
LOC_Os08g06110	OsLHY	[10]
LOC_Os10g03880		[10]
LOC_Os08g34410		[10]
LOC_Os01g63930		[10]
LOC_Os06g13839		[10]
LOC_Os02g10390		[10]
LOC_Os03g21700		[10]
LOC_Os04g49700		[10]
LOC_Os02g33680		[10]
LOC_Os11g04470		[10]
LOC_Os11g10130		[10]
LOC_Os10g01470		[10]
LOC_Os04g38600		[10]
LOC_Os01g08140		[10]
LOC_Os11g47820		[10]
LOC_Os10g37400		[10]
LOC_Os07g38890		[10]
LOC_Os12g36860	OsPBZ19	[10]
LOC_Os04g52440		[10]
LOC_Os06g47130		[10]
LOC_Os05g04470		[10]
LOC_Os02g32850		[10]
LOC_Os12g05270		[10]
LOC_Os09g34320		[10]
LOC_Os01g41140		[10]
LOC_Os03g48060		[10]
LOC_Os01g62870	AKR4C14|OsI_04428|OsAKR2	[10]
LOC_Os02g36210	OsCPS2|OsCyc2	[10]
LOC_Os02g16909		[10]
LOC_Os11g11490		[10]
LOC_Os04g09670		[10]
LOC_Os07g08520		[10]
LOC_Os03g13030		[10]
LOC_Os11g39810		[10]
LOC_Os06g22030		[10]
LOC_Os12g03290		[10]
LOC_Os01g71280		[10]
LOC_Os02g50250		[10]
LOC_Os05g36270	OscFBP2	[10]
LOC_Os01g01340	Lir1|OsLIR1	[10]
LOC_Os03g14190		[10]
LOC_Os02g49680		[10]
LOC_Os02g03270		[10]
LOC_Os01g43140		[10]
LOC_Os05g14070		[10]
LOC_Os12g40350		[10]
LOC_Os05g31110	OsHXK10	[10]
LOC_Os05g20020		[10]
LOC_Os04g31580		[10]
LOC_Os10g10149		[10]
LOC_Os04g37680		[10]
LOC_Os02g49570		[10]
LOC_Os02g29250		[10]
LOC_Os08g06100	COMT|OsCOMT	[10]
LOC_Os12g01750		[10]
LOC_Os12g06990		[10]
LOC_Os04g56820		[10]
LOC_Os02g38120		[10]
LOC_Os05g25640		[10]
LOC_Os12g38300	OsMT1d	[10]
LOC_Os07g32660		[10]
LOC_Os02g50690		[10]
LOC_Os06g12910		[10]
LOC_Os01g19450		[10]
LOC_Os06g13990		[10]
LOC_Os02g32060		[10]
LOC_Os02g53380		[10]
LOC_Os06g47630		[10]
LOC_Os06g41710		[10]
LOC_Os10g41420		[10]
LOC_Os03g55570		[10]
LOC_Os05g08480		[10]
LOC_Os03g08930		[10]
LOC_Os05g05180		[10]
LOC_Os03g19452		[10]
LOC_Os05g37060	MID1|OsARM1	[10]
LOC_Os07g45060		[10]
LOC_Os03g04120	OsACS	[10]
LOC_Os02g16770		[10]
LOC_Os01g42420		[10]
LOC_Os03g46070	TLP|PR5	[10]
LOC_Os08g29510		[10]
LOC_Os04g01470		[10]
LOC_Os11g10520		[10]
LOC_Os06g47870		[10]
LOC_Os04g54610		[10]
LOC_Os05g09440		[10]
LOC_Os11g02080		[10]
LOC_Os04g01690	ADCa|OsAdc2	[10]
LOC_Os01g54350		[10]
LOC_Os08g02850		[10]
LOC_Os05g30500	RH1	[10]
LOC_Os01g49830		[10]
LOC_Os11g30760		[10]
LOC_Os05g48790		[10]
LOC_Os02g30170		[10]
LOC_Os08g04240		[10]
LOC_Os03g57990		[10]
LOC_Os09g28520	SG1	[10]
LOC_Os03g41460	SAPK10	[10]
LOC_Os08g27720		[10]
LOC_Os05g30250		[10]
LOC_Os07g40420		[10]
LOC_Os02g12680	OsAOS3|OsHPL2	[10]
LOC_Os12g28820		[10]
LOC_Os02g39360		[10]
LOC_Os06g12030		[10]
LOC_Os07g34280		[10]
LOC_Os07g33030		[10]
LOC_Os04g43650		[10]
LOC_Os11g23000		[10]
LOC_Os12g06410		[10]
LOC_Os12g21850		[10]
LOC_Os01g12560		[10]
LOC_Os06g48720	OsHMA2|OsHMA2v	[10]
LOC_Os01g52340		[10]
LOC_Os03g20120	OsGolS1	[10]
LOC_Os05g11960		[10]
LOC_Os10g33350		[10]
LOC_Os11g06720	ASR5|OsAsr1|OsASR2	[10]
LOC_Os02g52480	KRP1	[10]
LOC_Os11g29870	OsWRKY72	[10]
LOC_Os07g09630		[10]
LOC_Os02g52930		[10]
LOC_Os05g32230		[10]
LOC_Os03g57940	CKI|EL1|Hd16	[10]
LOC_Os03g13070		[10]
LOC_Os02g01510		[10]
LOC_Os05g37050		[10]
LOC_Os05g09000		[10]
LOC_Os09g32992		[10]
LOC_Os07g09830		[10]
LOC_Os03g46060	OsLP|PR-5	[10]
LOC_Os01g07640		[10]
LOC_Os01g23770		[10]
LOC_Os03g61490		[10]
LOC_Os08g34790	Os4CL5	[10]
LOC_Os05g50100		[10]
LOC_Os12g02040		[10]
LOC_Os04g10060	OsDTS2|OsKSL4|OsKS4	[10]
LOC_Os06g36330		[10]
LOC_Os12g08770		[10]
LOC_Os07g25370		[10]
LOC_Os07g25800		[10]
LOC_Os01g10780		[10]
LOC_Os05g32460		[10]
LOC_Os05g41610		[10]
LOC_Os10g11012		[10]
LOC_Os08g44270	OsSAG12-2	[10]
LOC_Os06g01850	OsLFNR2|LFNR2	[10]
LOC_Os01g59450		[10]
LOC_Os03g19630		[10]
LOC_Os04g49870		[10]
LOC_Os12g04870		[10]
LOC_Os02g51680		[10]
LOC_Os12g36210		[10]
LOC_Os06g11330		[10]
LOC_Os12g32230		[10]
LOC_Os02g43330	OsHOX24	[10]
LOC_Os02g07110		[10]
LOC_Os03g51610		[10]
LOC_Os02g41954		[10]
LOC_Os01g49270		[10]
LOC_Os12g04090		[10]
LOC_Os02g46260		[10]
LOC_Os05g07090		[10]
LOC_Os07g35350		[10]
LOC_Os09g38490		[10]
LOC_Os03g63390		[10]
LOC_Os08g28800		[10]
LOC_Os12g43490		[10]
LOC_Os06g48160		[10]
LOC_Os09g39020		[10]
LOC_Os01g37460		[10]
LOC_Os04g24610		[10]
LOC_Os05g06710		[10]
LOC_Os10g30070		[10]
LOC_Os12g31200		[10]
LOC_Os04g01930		[10]
LOC_Os02g18460		[10]
LOC_Os12g39630	SAPK9	[10]
LOC_Os07g37100	OsENT2	[10]
LOC_Os05g25040		[10]
LOC_Os12g38850		[10]
LOC_Os06g19444		[10]
LOC_Os01g42400		[10]
LOC_Os11g26790	RAB21|Rab16A|OsRab16A	[10]
LOC_Os01g73960		[10]
LOC_Os06g44620	Os4CL4	[10]
LOC_Os09g20260		[10]
LOC_Os02g48640		[10]
LOC_Os01g23760		[10]
LOC_Os06g06250		[10]
LOC_Os01g39970		[10]
LOC_Os05g26660		[10]
LOC_Os12g03040	ONAC131	[10]
LOC_Os12g02030		[10]
LOC_Os04g50020		[10]
LOC_Os06g40990		[10]
LOC_Os12g08090		[10]
LOC_Os04g43390		[10]
LOC_Os05g25860		[10]
LOC_Os05g40270		[10]
LOC_Os02g56920	OsGL1-6	[10]
LOC_Os12g04460		[10]
LOC_Os03g56720		[10]
LOC_Os05g41270		[10]
LOC_Os01g17170	PNZIP|OsCRD1|YL-1	[10]
LOC_Os12g07840		[10]
LOC_Os07g39100		[10]
LOC_Os05g02570		[10]
LOC_Os10g22700		[10]
LOC_Os02g47650		[10]
LOC_Os05g49900	OsCHS	[10]
LOC_Os05g45490		[10]
LOC_Os02g51110	Lsi1|OsNIP2;1|OsLsi1	[10]
LOC_Os07g05270		[10]
LOC_Os09g25810		[10]
LOC_Os09g38480		[10]
LOC_Os04g56750		[10]
LOC_Os08g29340		[10]
LOC_Os11g34440		[10]
LOC_Os07g32600		[10]
LOC_Os09g29830		[10]
LOC_Os07g23570		[10]
LOC_Os01g74510		[10]
LOC_Os08g38370		[10]
LOC_Os11g39680		[10]
LOC_Os05g08900		[10]
LOC_Os06g13960		[10]
LOC_Os04g34480		[10]
LOC_Os05g45990		[10]
LOC_Os06g46284		[10]
LOC_Os11g38390		[10]
LOC_Os03g19462		[10]
LOC_Os08g09010		[10]
LOC_Os06g41120		[10]
LOC_Os03g59380		[10]
LOC_Os03g21090		[10]
LOC_Os01g34900		[10]
LOC_Os07g08360		[10]
LOC_Os04g52980		[10]
LOC_Os01g51260		[10]
LOC_Os07g36370		[10]
LOC_Os03g46860		[10]
LOC_Os07g40630		[10]
LOC_Os08g35730		[10]
LOC_Os06g11135		[10]
LOC_Os07g36400		[10]
LOC_Os01g72350		[10]
LOC_Os03g18220	OsPDC2	[10]
LOC_Os02g30940		[10]
LOC_Os05g08910		[10]
LOC_Os10g34480		[10]
LOC_Os12g08550		[10]
LOC_Os02g04380		[10]
LOC_Os09g27930	UbL401	[10]
LOC_Os01g64790	OsEREBP2|ERF99	[10]
LOC_Os01g12190		[10]
LOC_Os05g15510		[10]
LOC_Os07g47520		[10]
LOC_Os02g11070		[10]
LOC_Os08g44850		[10]
LOC_Os08g34610		[10]
LOC_Os01g14430		[10]
LOC_Os04g40040		[10]
LOC_Os12g23090		[10]
LOC_Os01g15900	RDD1	[10]
LOC_Os01g70770		[10]
LOC_Os02g17920		[10]
LOC_Os05g35400	OsBiP4	[10]
LOC_Os04g58730		[10]
LOC_Os01g28050		[10]
LOC_Os07g48760		[10]
LOC_Os09g36440	OsTFIIB	[10]
LOC_Os09g36735		[10]
LOC_Os09g36730	OsMYB108	[10]
LOC_Os12g23950		[10]
LOC_Os12g44150		[10]
LOC_Os02g43340		[10]
LOC_Os03g63280		[10]
LOC_Os02g38920	OsGAPDH1	[10]
LOC_Os05g03740		[10]
LOC_Os03g07400		[10]
LOC_Os02g53180	OsACO3	[10]
LOC_Os04g41570		[10]
LOC_Os10g38720		[10]
LOC_Os01g13950		[10]
LOC_Os05g44300		[10]
LOC_Os07g35480		[10]
LOC_Os02g16620		[10]
LOC_Os06g48500		[10]
LOC_Os06g04490		[10]
LOC_Os07g22930	OsGBSSII	[10]
LOC_Os05g50930	OsSIG5	[10]
LOC_Os03g07880		[10]
LOC_Os04g31400		[10]
LOC_Os06g11140		[10]
LOC_Os11g39040		[10]
LOC_Os12g02300		[10]
LOC_Os02g54690		[10]
LOC_Os12g02940		[10]
LOC_Os10g35604		[10]
LOC_Os04g58200	OsPORA	[10]
LOC_Os06g14700		[10]
LOC_Os05g27749		[10]
LOC_Os01g15490		[10]
LOC_Os06g44034	SDT	[10]
LOC_Os08g34984		[10]
LOC_Os11g13570		[10]
LOC_Os05g12481		[10]
LOC_Os06g16420		[10]
LOC_Os07g46220		[10]
LOC_Os08g25720		[10]
LOC_Os02g41630		[10]
LOC_Os06g48250		[10]
LOC_Os02g30714		[10]
LOC_Os02g47670		[10]
LOC_Os04g51880		[10]
LOC_Os07g02330		[10]
LOC_Os12g24020		[10]
LOC_Os01g14670		[10]
LOC_Os12g38570		[10]
LOC_Os07g01310		[10]
LOC_Os08g23880		[10]
LOC_Os03g04770		[10]
LOC_Os03g63450		[10]
LOC_Os02g33070		[10]
LOC_Os07g33410		[10]
LOC_Os05g32300		[10]
LOC_Os04g26920		[10]
LOC_Os10g14180		[10]
LOC_Os01g09850	OsIDD2	[10]
LOC_Os05g02020	OsRLCK176|BML	[10]
LOC_Os03g51640		[10]
LOC_Os02g08460		[10]
LOC_Os01g39350		[10]
LOC_Os02g07410		[10]
LOC_Os07g33090		[10]
LOC_Os01g66850		[10]
LOC_Os06g14010		[10]
LOC_Os05g03640		[10]
LOC_Os11g47840		[10]
LOC_Os02g44900		[10]
LOC_Os11g39050		[10]
LOC_Os01g04409		[10]
LOC_Os09g12310		[10]
LOC_Os04g48880		[10]
LOC_Os07g32120		[10]
LOC_Os01g57890	OSTF1	[10]
LOC_Os01g07850		[10]
LOC_Os02g13800		[10]
LOC_Os09g19970		[10]
LOC_Os09g38730		[10]
LOC_Os11g10590	OsDT11	[10]
LOC_Os03g55550		[10]
LOC_Os01g42234		[10]
LOC_Os07g09430		[10]
LOC_Os03g56770		[10]
LOC_Os03g42500		[10]
LOC_Os06g36810		[10]
LOC_Os06g07380		[10]
LOC_Os07g30860		[10]
LOC_Os02g55480		[10]
LOC_Os12g40310		[10]
LOC_Os03g13540		[10]
LOC_Os01g56780		[10]
LOC_Os01g39070		[10]
LOC_Os04g35840		[10]
LOC_Os03g25304		[10]
LOC_Os08g27170	OsSARD1	[10]
LOC_Os11g07480		[10]
LOC_Os01g39040		[10]
LOC_Os04g01810		[10]
LOC_Os07g44060		[10]
LOC_Os08g31410		[10]
LOC_Os06g47270	OsDIRP1	[10]
LOC_Os06g29810	OsPK10|Pid2	[10]
LOC_Os03g17350	Rcn1|OsABCG5	[10]
LOC_Os02g09050		[10]
LOC_Os02g09080		[10]
LOC_Os12g05360		[10]
LOC_Os01g65880		[10]
LOC_Os01g65520		[10]
LOC_Os06g12740		[10]
LOC_Os05g24900		[10]
LOC_Os06g46580		[10]
LOC_Os12g39640		[10]
LOC_Os08g06740		[10]
LOC_Os11g34690		[10]
LOC_Os11g08430		[10]
LOC_Os04g09900	OsCPS4|OsCyc1	[10]
LOC_Os11g33270	OsXTR1|XTH2	[10]
LOC_Os01g03680		[10]
LOC_Os09g31380		[10]
LOC_Os09g20220		[10]
LOC_Os11g47330		[10]
LOC_Os02g03990		[10]
LOC_Os05g15310		[10]
LOC_Os04g32220		[10]
LOC_Os03g01260		[10]
LOC_Os09g38720		[10]
LOC_Os09g11460	Sub1C	[10]
LOC_Os03g19610	OsPME1	[10]
LOC_Os03g61510		[10]
LOC_Os10g29850		[10]
LOC_Os01g67390		[10]
LOC_Os01g08440		[10]
LOC_Os12g04424		[10]
LOC_Os08g37380		[10]
LOC_Os01g17396		[10]
LOC_Os03g28980		[10]
LOC_Os08g08970		[10]
LOC_Os01g43550	OsWRKY12	[10]
LOC_Os05g10650	OsPPi-PFK	[10]
LOC_Os03g11600	DL	[10]
LOC_Os08g03870		[10]
LOC_Os11g26780		[10]
LOC_Os05g36050		[10]
LOC_Os12g39110		[10]
LOC_Os10g41070		[10]
LOC_Os09g10260		[10]
LOC_Os08g24820		[10]
LOC_Os06g42120		[10]
LOC_Os12g37900		[10]
LOC_Os03g26480		[10]
LOC_Os10g05880		[10]
LOC_Os07g48570	OsDof24	[10]
LOC_Os01g07330	HEIP1	[10]
LOC_Os05g41880	OsMSH5	[31]
LOC_Os04g40290	CRC1	[31]
LOC_Os12g31370	OsRad51A2	[31]
LOC_Os11g40150	OsRad51|OsRad51A1	[31]; [10]
LOC_Os01g61570		[42]
LOC_Os01g03180		[42]
LOC_Os03g28990		[42]
LOC_Os06g16740		[42]
LOC_Os12g41200		[42]
LOC_Os03g49464		[42]
LOC_Os06g47850		[42]
LOC_Os02g45770	OsMADS6|MFO1	[42]
LOC_Os04g01740		[42]
LOC_Os05g36186		[42]
LOC_Os01g08260	OsPDR6|OsABCG31	[42]
LOC_Os12g23460		[42]
LOC_Os06g44540		[42]
LOC_Os09g15480		[42]
LOC_Os06g07770		[42]
LOC_Os01g52690		[42]
LOC_Os07g09480		[42]
LOC_Os05g07740		[42]
LOC_Os03g36650		[42]
LOC_Os01g55120		[42]
LOC_Os03g15340		[42]
LOC_Os08g02094		[42]
LOC_Os01g05530		[42]
LOC_Os01g14630	OsGPPS	[42]
LOC_Os11g24180		[42]
LOC_Os08g05820		[42]
LOC_Os03g52160		[42]
LOC_Os09g23620		[42]
LOC_Os07g35610	DTC1	[42]
LOC_Os04g52280	FC1|OsCAD7	[42]
LOC_Os02g18750		[42]
LOC_Os06g41280		[42]
LOC_Os02g40340		[42]
LOC_Os03g62740		[42]
LOC_Os11g30560	OsHSD1|LGF1	[42]
LOC_Os05g35230		[42]
LOC_Os05g46470		[42]
LOC_Os01g11940		[42]
LOC_Os11g33000		[42]
LOC_Os08g33150		[42]
LOC_Os11g16770		[42]
LOC_Os06g43044		[42]
LOC_Os09g32540	LGD1	[42]
LOC_Os06g40150		[42]
LOC_Os09g38680		[42]
LOC_Os02g40784	OsCER1	[42]
LOC_Os05g35360		[42]
LOC_Os06g40230		[42]
LOC_Os09g36500		[42]
LOC_Os08g32310		[42]
LOC_Os03g15320		[42]
LOC_Os03g54170	OsMADS34|PAP2	[42]
LOC_Os02g46680		[42]
LOC_Os01g02190		[42]
LOC_Os02g53830		[42]
LOC_Os12g32750	OsYUCCA5	[42]
LOC_Os01g62430	Rpp17|OsERG1	[42]
LOC_Os03g54160	OsMADS14	[42]
LOC_Os01g73770	OsDREB1F|RCBF2	[42]
LOC_Os06g02230		[42]
LOC_Os09g07150		[42]
LOC_Os02g44320		[42]
LOC_Os03g14210		[42]
LOC_Os01g04290		[42]
LOC_Os07g23640	RePRP2.2	[42]
LOC_Os01g03170		[42]
LOC_Os01g70500		[42]
LOC_Os02g54830		[42]
LOC_Os09g14550		[42]
LOC_Os02g57360		[42]
LOC_Os01g12520		[42]
LOC_Os02g38804		[42]
LOC_Os04g13160		[42]
LOC_Os03g11370		[42]
LOC_Os03g39910		[42]
LOC_Os01g08180		[42]
LOC_Os11g24484		[42]
LOC_Os04g20330	OscZOG1	[42]
LOC_Os05g34450		[42]
LOC_Os07g23660	RePRP2.1	[42]
LOC_Os09g11780		[42]
LOC_Os07g14514		[42]
LOC_Os07g47080		[42]
LOC_Os07g46820		[42]
LOC_Os02g03750		[42]
LOC_Os06g32600	OsTHION15	[42]; [10]
LOC_Os01g55610		[42]; [10]
LOC_Os01g57610	OsGH3.1|OsGH3-1|LC1	[42]; [10]
LOC_Os04g55240		[42]; [10]
LOC_Os04g18650		[42]; [10]
LOC_Os10g05950		[42]; [10]
LOC_Os08g30850		[42]; [10]
LOC_Os02g38290		[42]; [10]
LOC_Os02g40440		[42]; [10]
LOC_Os01g61940	OsABCG3	[42]; [10]
LOC_Os09g07154		[42]; [10]
LOC_Os04g48210		[42]; [10]
LOC_Os08g45150		[42]; [4]
LOC_Os04g35550		[42]; [4]
LOC_Os08g29770		[42]; [4]
LOC_Os01g50400	OsMAPKKK55	[42]; [4]
LOC_Os01g56530		[42]; [4]
LOC_Os03g15460	PLA2-II	[42]; [4]
LOC_Os01g50900		[42]; [4]
LOC_Os05g07120		[42]; [4]
LOC_Os08g37760		[42]; [4]
LOC_Os11g10910		[42]; [4]
LOC_Os05g38350		[42]; [4]; [10]
LOC_Os07g46210		[42]; [4]; [10]
LOC_Os03g10810		[42]; [4]; [10]
LOC_Os03g01590	PAIR1	[31]; [41]
LOC_Os09g32930	PAIR2	[31]; [41]
LOC_Os03g58600	MEL1	[31]; [41]; [10]
LOC_Os12g38460	MEL2	[31]
LOC_Os05g42240	OsSPL	[88]
LOC_Os05g50410	OsRad21-4|OsREC8	[31]; [41]
LOC_Os01g66690	ZIP4|SPO22	[31]
LOC_Os03g50220	OsHOP2	[31]; [27]
LOC_Os05g51650		[34]
LOC_Os06g05820		[34]
LOC_Os05g36350		[34]
LOC_Os05g34460	TCM5	[34]
LOC_Os06g06750	OsMADS5	[34]
LOC_Os02g50820		[34]
LOC_Os05g06300		[34]
LOC_Os01g62570		[34]
LOC_Os01g68630		[34]
LOC_Os12g12260		[34]
LOC_Os09g24660		[34]
LOC_Os06g39240		[34]
LOC_Os02g02020		[34]
LOC_Os02g45590		[34]
LOC_Os11g42890		[34]
LOC_Os12g12664		[34]
LOC_Os12g41390		[34]
LOC_Os06g46480		[34]
LOC_Os08g38600		[34]
LOC_Os08g41280		[34]
LOC_Os11g32759		[34]
LOC_Os02g17250		[34]
LOC_Os04g49550		[34]
LOC_Os07g12600		[34]
LOC_Os03g46190		[34]
LOC_Os02g02800		[34]
LOC_Os01g46040		[34]
LOC_Os02g51810		[34]
LOC_Os04g53360		[34]
LOC_Os02g30900	OsPBL1	[34]
LOC_Os01g51310		[34]
LOC_Os06g45590		[34]
LOC_Os02g39880		[34]
LOC_Os08g41620		[34]
LOC_Os08g34130		[34]
LOC_Os09g25190		[34]
LOC_Os07g36590		[34]
LOC_Os09g29750		[34]
LOC_Os11g32910		[34]
LOC_Os08g10470		[34]
LOC_Os07g23900		[34]
LOC_Os06g05480		[34]
LOC_Os05g30970	OsBON3	[34]
LOC_Os06g07760	OsSrx	[34]
LOC_Os01g58690		[34]
LOC_Os02g37000		[34]
LOC_Os05g30480	OsBiP3|BiP3	[34]
LOC_Os10g37420		[34]
LOC_Os08g16940		[34]
LOC_Os07g42250		[34]
LOC_Os05g38580		[34]
LOC_Os03g55220		[34]
LOC_Os05g30570		[34]
LOC_Os09g14960		[34]
LOC_Os02g21330		[34]
LOC_Os03g38210	OsGAMYBL2	[34]
LOC_Os05g34000		[34]
LOC_Os10g25030	OsRCCR1	[34]
LOC_Os03g13520		[34]
LOC_Os12g24580		[34]
LOC_Os03g09870		[34]
LOC_Os05g43610		[34]
LOC_Os03g11700		[34]
LOC_Os10g05720	OsDIL|OsLTP6	[34]
LOC_Os06g05580		[34]
LOC_Os10g27470		[34]
LOC_Os02g09410		[34]
LOC_Os06g11610		[34]
LOC_Os01g33090		[34]
LOC_Os02g42650		[34]
LOC_Os12g36630		[34]
LOC_Os03g11490		[34]
LOC_Os05g45860		[34]
LOC_Os06g50890		[34]
LOC_Os04g48940		[34]
LOC_Os03g48230		[34]
LOC_Os10g39230		[34]
LOC_Os09g31031	UbL404	[34]
LOC_Os06g31100		[34]
LOC_Os03g01840		[34]
LOC_Os02g04960		[34]
LOC_Os02g53430		[34]
LOC_Os07g12610		[34]
LOC_Os03g04030		[34]
LOC_Os09g37410		[34]
LOC_Os08g41380		[34]
LOC_Os05g01230		[34]
LOC_Os03g01200		[34]
LOC_Os07g36690		[34]
LOC_Os10g03660	OsADF	[34]
LOC_Os04g58080		[34]
LOC_Os01g70920		[34]
LOC_Os07g46770		[34]
LOC_Os07g49270		[34]
LOC_Os11g08200	OsAsp1	[34]
LOC_Os03g53510		[34]
LOC_Os03g17340		[34]
LOC_Os03g22470		[34]
LOC_Os09g15800		[34]
LOC_Os06g03890	OsGLIP1	[34]
LOC_Os05g39190		[34]
LOC_Os01g08860	OsHSP18.2|Oshsp18.0-CII	[34]
LOC_Os01g27160		[34]
LOC_Os05g02240		[34]
LOC_Os08g10730		[34]
LOC_Os01g43040		[34]
LOC_Os01g46760		[34]
LOC_Os04g40380		[34]
LOC_Os02g50570		[34]
LOC_Os03g44150	OsOAT	[34]
LOC_Os04g44600		[34]
LOC_Os02g29150	OsRALyase	[34]
LOC_Os04g43490		[34]
LOC_Os02g39410		[34]
LOC_Os05g45090		[34]
LOC_Os01g50980		[34]
LOC_Os04g56800		[34]
LOC_Os11g37200		[34]
LOC_Os12g14059		[34]
LOC_Os02g57690		[34]
LOC_Os05g51670		[34]
LOC_Os05g43130		[34]
LOC_Os07g32900		[34]
LOC_Os06g13010		[34]
LOC_Os06g50880		[34]
LOC_Os08g06200		[34]
LOC_Os08g09260		[34]
LOC_Os01g52470		[34]
LOC_Os01g38520		[34]
LOC_Os07g06940	WP1|OsValRS2	[34]
LOC_Os03g24339		[34]
LOC_Os10g22750		[34]
LOC_Os10g26060	GluA|OsGluA2	[34]
LOC_Os06g42850		[34]
LOC_Os01g66030	OsMADS2	[34]
LOC_Os01g58530		[34]
LOC_Os03g62830		[34]
LOC_Os11g38870		[34]
LOC_Os01g65850		[34]
LOC_Os09g36830		[34]
LOC_Os06g10000		[34]
LOC_Os04g52560		[34]
LOC_Os02g52420		[34]
LOC_Os09g10730		[34]
LOC_Os09g37400	OsSAUR45	[34]
LOC_Os07g36910		[34]
LOC_Os01g51770		[34]
LOC_Os08g41390	rFKBP64	[34]
LOC_Os12g33210		[34]
LOC_Os01g51370		[34]
LOC_Os02g54000		[34]
LOC_Os03g04970		[34]
LOC_Os06g16960		[34]
LOC_Os01g24060		[34]
LOC_Os07g42650		[34]
LOC_Os02g20970		[34]
LOC_Os01g05710		[34]
LOC_Os10g31900		[34]
LOC_Os03g61140		[34]
LOC_Os05g09580		[34]
LOC_Os12g43730		[34]
LOC_Os07g49510		[34]
LOC_Os09g29080		[34]
LOC_Os02g39384		[34]
LOC_Os07g05710		[34]
LOC_Os04g20590		[34]
LOC_Os05g38160		[34]
LOC_Os01g31220		[34]
LOC_Os04g44470	RASI	[34]
LOC_Os05g35266		[34]
LOC_Os12g43840		[34]
LOC_Os02g29160		[34]
LOC_Os08g42020		[34]
LOC_Os02g21310		[34]
LOC_Os08g20420		[34]
LOC_Os12g38560		[34]
LOC_Os06g12320		[34]
LOC_Os02g04230	OsMPK13|OsBIMK2	[34]
LOC_Os01g65590		[34]
LOC_Os01g10860		[34]
LOC_Os04g59460		[34]
LOC_Os03g50760		[34]
LOC_Os08g43480		[34]
LOC_Os10g24690		[34]
LOC_Os02g12490		[34]
LOC_Os03g50160		[34]
LOC_Os02g49730		[34]
LOC_Os07g44800		[34]
LOC_Os03g06440		[34]
LOC_Os07g07530		[34]
LOC_Os10g27450		[34]
LOC_Os03g50780	TIP3	[34]
LOC_Os05g42300		[34]
LOC_Os03g30580		[34]
LOC_Os09g35700	YY1|OsLTPc2|LTPL45	[34]
LOC_Os02g42670		[34]
LOC_Os11g31680		[34]
LOC_Os01g66720		[34]
LOC_Os07g07150		[34]
LOC_Os11g31110		[34]
LOC_Os07g33370		[34]
LOC_Os04g31320	OsSWIB	[34]
LOC_Os08g39250		[34]
LOC_Os05g03050		[34]
LOC_Os05g07220		[34]
LOC_Os12g06150		[34]
LOC_Os03g19540		[34]
LOC_Os02g11680		[34]
LOC_Os05g33920		[34]
LOC_Os07g15440		[34]
LOC_Os06g42220		[34]
LOC_Os06g10610		[34]
LOC_Os06g14550		[34]
LOC_Os07g43180		[34]
LOC_Os04g41980		[34]
LOC_Os01g03710		[34]
LOC_Os03g19490		[34]
LOC_Os08g35630		[34]
LOC_Os06g10100		[34]
LOC_Os04g55810		[34]
LOC_Os01g71256		[34]
LOC_Os01g71250		[34]
LOC_Os06g01370		[34]
LOC_Os05g50080		[34]
LOC_Os07g22534		[34]
LOC_Os03g22450	OsRad9	[34]
LOC_Os09g10850		[34]
LOC_Os11g35050		[34]
LOC_Os06g44140		[34]
LOC_Os01g15860		[34]
LOC_Os05g48340		[34]
LOC_Os02g38780		[34]
LOC_Os01g71320		[34]
LOC_Os09g35850		[34]
LOC_Os08g36920		[34]
LOC_Os03g02570		[34]
LOC_Os03g51200		[34]
LOC_Os08g03430		[34]
LOC_Os03g40390		[34]
LOC_Os11g01860		[34]
LOC_Os03g59550		[34]
LOC_Os05g38530	OsctHSP70-1	[34]
LOC_Os02g15270		[34]
LOC_Os02g48220		[34]
LOC_Os04g58610		[34]
LOC_Os03g62490		[34]
LOC_Os07g02280		[34]
LOC_Os07g05960		[34]
LOC_Os07g40460		[34]
LOC_Os01g65450		[34]
LOC_Os03g11840		[34]
LOC_Os11g31740		[34]
LOC_Os03g11020		[34]
LOC_Os12g05990		[34]
LOC_Os09g36320	BSR1	[34]
LOC_Os01g73662		[34]
LOC_Os05g50750		[34]
LOC_Os11g42930		[34]
LOC_Os03g50330		[34]
LOC_Os10g22330		[34]
LOC_Os11g38250		[34]
LOC_Os03g11440		[34]
LOC_Os11g42850		[34]
LOC_Os06g37560	OsBGal2	[34]
LOC_Os01g43430		[34]
LOC_Os02g34430		[34]
LOC_Os05g43970		[34]
LOC_Os05g10580		[34]
LOC_Os03g19550		[34]
LOC_Os01g24950		[34]
LOC_Os01g08650		[34]
LOC_Os12g33230		[34]
LOC_Os04g57730		[34]
LOC_Os04g32060		[34]
LOC_Os08g32350		[34]
LOC_Os07g09110		[34]
LOC_Os09g20430		[34]
LOC_Os01g49370		[34]
LOC_Os04g54510		[34]
LOC_Os03g47990		[34]
LOC_Os02g05520		[34]
LOC_Os03g18190		[34]
LOC_Os06g01410		[34]
LOC_Os05g39140		[34]
LOC_Os03g15960		[34]
LOC_Os08g08230		[34]
LOC_Os03g56660		[34]
LOC_Os10g40820		[34]
LOC_Os10g40824		[34]
LOC_Os08g05810		[34]
LOC_Os03g48260		[34]
LOC_Os05g41130		[34]
LOC_Os04g44890		[34]
LOC_Os08g40910		[34]
LOC_Os11g05080		[34]
LOC_Os09g39780	OsCYP-25|CYP19-3	[34]
LOC_Os08g43140		[34]
LOC_Os07g17330		[34]
LOC_Os12g07830		[34]
LOC_Os01g70570		[34]
LOC_Os08g40820		[34]
LOC_Os06g29310	OsOTS1	[34]
LOC_Os02g47370		[34]
LOC_Os01g50310		[34]
LOC_Os06g06490		[34]
LOC_Os12g18200		[34]
LOC_Os10g34602		[34]
LOC_Os04g47900		[34]
LOC_Os01g39020	OsHsfA7	[34]
LOC_Os07g41180		[34]
LOC_Os04g43040		[34]
LOC_Os03g16020		[34]
LOC_Os08g16030		[34]
LOC_Os01g73580		[34]
LOC_Os07g32730		[34]
LOC_Os01g40190		[34]
LOC_Os06g46690		[34]
LOC_Os01g16540		[34]
LOC_Os01g18870	TIP2|bHLH142	[34]
LOC_Os05g06130		[34]
LOC_Os04g52750		[34]
LOC_Os07g37700		[34]
LOC_Os01g66700		[34]
LOC_Os08g32360		[34]
LOC_Os03g25380		[34]
LOC_Os03g47614		[34]
LOC_Os07g32040		[34]
LOC_Os02g17370		[34]
LOC_Os06g44050	Sdt97	[34]
LOC_Os01g42110		[34]
LOC_Os10g41190		[34]
LOC_Os11g04910		[34]
LOC_Os03g47570		[34]
LOC_Os03g19900		[34]
LOC_Os05g39150		[34]
LOC_Os07g37920		[34]
LOC_Os11g01240		[34]
LOC_Os12g40380		[34]
LOC_Os04g57940		[34]
LOC_Os03g22540		[34]
LOC_Os01g07140		[34]
LOC_Os01g21860		[34]
LOC_Os03g22360		[34]
LOC_Os03g03550		[34]
LOC_Os06g40950		[34]
LOC_Os06g11070		[34]
LOC_Os01g15530		[34]
LOC_Os03g62160		[34]
LOC_Os08g40630		[34]
LOC_Os03g47980		[34]
LOC_Os04g56440		[34]
LOC_Os06g30920		[34]
LOC_Os01g47410		[34]
LOC_Os07g25740		[34]
LOC_Os07g20150		[34]
LOC_Os05g35340		[34]
LOC_Os05g44340	HSP101|OsClpB-cyt|HSP100	[34]
LOC_Os04g56840		[34]
LOC_Os05g42150		[34]
LOC_Os08g35010		[34]
LOC_Os05g38190		[34]
LOC_Os01g13520		[34]
LOC_Os11g14990		[34]
LOC_Os08g09730		[34]
LOC_Os03g16030	OsHsp18.0-CI|Oshsp18.0	[34]
LOC_Os05g43770		[34]
LOC_Os09g08570		[34]
LOC_Os12g36680		[34]
LOC_Os02g06754		[34]
LOC_Os04g46170		[34]
LOC_Os02g50680		[34]
LOC_Os03g06490		[34]
LOC_Os05g06650		[34]
LOC_Os07g43970		[34]
LOC_Os04g36890		[34]
LOC_Os08g32590		[34]
LOC_Os03g06920		[34]
LOC_Os02g21750		[34]
LOC_Os01g07110		[34]
LOC_Os07g48170		[34]
LOC_Os08g01910		[34]
LOC_Os04g52720		[34]
LOC_Os02g44890		[34]
LOC_Os08g32370		[34]
LOC_Os02g21260		[34]
LOC_Os03g30200		[34]
LOC_Os07g38540		[34]
LOC_Os08g14310		[34]
LOC_Os03g46040		[34]
LOC_Os06g49150		[34]
LOC_Os03g05460		[34]
LOC_Os04g55150		[34]
LOC_Os03g14140		[34]
LOC_Os02g19130	OsFDML1	[34]
LOC_Os05g40330		[34]
LOC_Os09g30200		[34]
LOC_Os10g39130	OsMADS56	[34]
LOC_Os09g24870		[34]
LOC_Os12g40390		[34]
LOC_Os03g19040		[34]
LOC_Os03g48200		[34]
LOC_Os10g10360	OsLSR	[34]
LOC_Os02g05610		[34]
LOC_Os08g40930	OsISA1|OsPHS8	[34]
LOC_Os02g44130		[34]
LOC_Os01g68330		[34]
LOC_Os09g15700		[34]
LOC_Os12g04690		[34]
LOC_Os08g14880		[34]
LOC_Os05g49760		[34]
LOC_Os04g40130		[34]
LOC_Os03g18880		[34]
LOC_Os12g07810		[34]
LOC_Os10g34750		[34]
LOC_Os07g42380		[34]
LOC_Os02g04340		[34]
LOC_Os05g49930	OsSLRL2	[34]
LOC_Os02g14860		[34]
LOC_Os08g29530	OsDRB1-4	[34]
LOC_Os11g38610		[34]
LOC_Os02g57820		[34]
LOC_Os02g03340		[34]
LOC_Os05g47840	OsIPT7	[34]
LOC_Os01g13530		[34]
LOC_Os03g30780		[34]
LOC_Os02g02740		[34]
LOC_Os01g06340		[34]
LOC_Os07g28090		[34]
LOC_Os11g04240		[34]
LOC_Os07g30590		[34]
LOC_Os01g65550		[34]
LOC_Os09g32948	OsMADS8|OsMADS24	[34]
LOC_Os08g09410		[34]
LOC_Os11g39360		[34]
LOC_Os06g06450		[34]
LOC_Os06g47120		[34]
LOC_Os10g43060		[34]
LOC_Os01g16920		[34]
LOC_Os02g46660		[34]
LOC_Os02g08490		[34]
LOC_Os07g37010		[34]
LOC_Os01g16850		[34]
LOC_Os02g08140		[34]
LOC_Os08g02840		[34]
LOC_Os05g25260		[34]
LOC_Os01g08020	BOR2	[34]
LOC_Os06g04699		[34]
LOC_Os01g49160		[34]
LOC_Os06g40020		[34]
LOC_Os01g67330		[34]
LOC_Os08g17500		[34]
LOC_Os03g22960		[34]
LOC_Os07g04340		[34]
LOC_Os10g03750		[34]
LOC_Os03g42350		[34]
LOC_Os08g19680		[34]
LOC_Os03g22560		[34]
LOC_Os03g19670		[34]
LOC_Os05g05280	PTB1	[34]
LOC_Os01g50610		[34]
LOC_Os12g43940		[34]
LOC_Os09g13940	OsERF109	[34]
LOC_Os05g39590		[34]
LOC_Os04g15920	RIF3	[34]
LOC_Os03g48830		[34]
LOC_Os02g55540		[34]
LOC_Os05g48300	OsPUP7	[34]
LOC_Os05g05354		[34]
LOC_Os02g11000		[34]
LOC_Os06g40840		[34]
LOC_Os08g06830		[34]
LOC_Os03g48235		[34]
LOC_Os05g44160		[34]
LOC_Os01g56510		[34]
LOC_Os10g39930		[34]
LOC_Os11g04070		[34]
LOC_Os08g25140		[34]
LOC_Os01g21590		[34]
LOC_Os08g08592		[34]
LOC_Os11g31700		[34]
LOC_Os12g05330		[34]
LOC_Os07g01820	OsMADS15|DEP	[34]
LOC_Os04g42784		[34]
LOC_Os09g08550		[34]
LOC_Os05g12130		[34]
LOC_Os06g32860		[34]
LOC_Os08g28870		[34]
LOC_Os04g36730		[34]
LOC_Os06g33330		[34]
LOC_Os05g08820		[34]
LOC_Os03g39160		[34]
LOC_Os09g15750		[34]
LOC_Os02g34470		[34]
LOC_Os02g12840		[34]
LOC_Os09g32370		[34]
LOC_Os07g08050		[34]
LOC_Os03g06900		[34]
LOC_Os01g02180		[34]
LOC_Os11g36930		[34]
LOC_Os03g46110		[34]
LOC_Os06g42700		[34]
LOC_Os03g47640		[34]
LOC_Os02g46150		[34]
LOC_Os01g18880		[34]
LOC_Os09g35740		[34]
LOC_Os02g44780	OsGGPPS2|OsGRP	[34]
LOC_Os11g34460	FKF1|OsFKF1	[34]
LOC_Os08g01620		[34]
LOC_Os11g45400	OsGPAT3	[34]
LOC_Os12g38440		[34]
LOC_Os04g58120		[34]
LOC_Os05g10560		[34]
LOC_Os11g13430		[34]
LOC_Os04g20990		[34]
LOC_Os06g49130		[34]
LOC_Os05g01730		[34]
LOC_Os03g61670	CRT	[34]
LOC_Os03g02720		[34]
LOC_Os05g40620		[34]
LOC_Os10g27360		[34]
LOC_Os01g11110		[34]
LOC_Os09g39630		[34]
LOC_Os01g22910		[34]
LOC_Os01g42090		[34]
LOC_Os02g02250		[34]
LOC_Os06g11600		[34]
LOC_Os09g19710		[34]
LOC_Os05g39210		[34]
LOC_Os04g04030		[34]
LOC_Os06g45710		[34]
LOC_Os03g44520		[34]
LOC_Os03g08000		[34]
LOC_Os11g40210		[34]
LOC_Os12g05780		[34]
LOC_Os12g23760		[34]
LOC_Os01g01369		[34]
LOC_Os02g30140		[34]
LOC_Os03g44780		[34]
LOC_Os11g37090		[34]
LOC_Os02g22020	NIGT1	[34]
LOC_Os11g24590		[34]
LOC_Os05g30400		[34]
LOC_Os02g03450		[34]
LOC_Os03g48225		[34]
LOC_Os04g47890	MOF1	[34]
LOC_Os11g37070		[34]
LOC_Os04g59600		[34]
LOC_Os07g47720		[34]
LOC_Os12g01880		[34]
LOC_Os06g29710		[34]
LOC_Os06g12020		[34]
LOC_Os01g14180		[34]
LOC_Os01g47040		[34]
LOC_Os10g39010		[34]
LOC_Os03g58650		[34]
LOC_Os03g17550		[34]
LOC_Os03g45120		[34]
LOC_Os08g20730		[34]
LOC_Os10g03100		[34]
LOC_Os07g05700		[34]
LOC_Os12g13160		[34]
LOC_Os02g43760		[34]
LOC_Os03g49200		[34]
LOC_Os03g51550	OsWDR5a|OsWDR5	[34]
LOC_Os03g57450	OsCPK10	[34]
LOC_Os05g50640		[34]
LOC_Os09g32360		[34]
LOC_Os07g06060		[34]
LOC_Os10g03910		[34]
LOC_Os09g03750		[34]
LOC_Os09g24210		[34]
LOC_Os01g41530		[34]
LOC_Os04g13150		[34]
LOC_Os09g29950		[34]
LOC_Os03g47650		[34]
LOC_Os01g45530		[34]
LOC_Os03g10740		[34]
LOC_Os06g14220		[34]
LOC_Os04g49310		[34]
LOC_Os07g41370	OsMADS18	[34]
LOC_Os03g60550		[34]
LOC_Os02g02540	OsGLR3.2	[34]
LOC_Os03g05870		[34]
LOC_Os12g43580		[34]
LOC_Os03g15550		[34]
LOC_Os10g25900		[34]
LOC_Os10g29495		[34]
LOC_Os07g02210		[34]
LOC_Os11g32380		[34]
LOC_Os01g41260		[34]
LOC_Os05g01610		[34]
LOC_Os01g20840		[34]
LOC_Os01g34770		[34]
LOC_Os06g23600		[34]
LOC_Os07g41750		[34]
LOC_Os02g37470		[34]
LOC_Os08g37104		[34]
LOC_Os03g05450		[34]
LOC_Os01g59680		[34]
LOC_Os01g62500		[34]
LOC_Os05g12330		[34]
LOC_Os06g09620		[34]
LOC_Os04g44570		[34]
LOC_Os12g40770		[34]
LOC_Os12g05680	OsTGA912	[34]
LOC_Os04g14690		[34]
LOC_Os03g05420	OsMTA3	[34]
LOC_Os03g26460		[34]
LOC_Os05g25910	OsOFP19	[34]
LOC_Os07g02910		[34]
LOC_Os07g48840		[34]
LOC_Os01g33410		[34]
LOC_Os06g03900	OsGLIP1	[34]
LOC_Os03g44310		[34]
LOC_Os07g33050		[34]
LOC_Os04g48730		[34]
LOC_Os05g47890	RACK1B|OsWD40-122	[34]
LOC_Os10g22860		[34]
LOC_Os01g74600		[34]
LOC_Os05g49670		[34]
LOC_Os06g37010		[34]
LOC_Os03g48310		[34]
LOC_Os10g21560		[34]
LOC_Os08g37690		[34]
LOC_Os02g55020		[34]
LOC_Os09g08620		[34]
LOC_Os01g42990		[34]
LOC_Os05g08840		[34]
LOC_Os01g71800		[34]
LOC_Os03g40780		[34]
LOC_Os01g53560		[34]
LOC_Os05g50654		[34]
LOC_Os01g62400		[34]
LOC_Os04g46680		[34]
LOC_Os06g13140		[34]
LOC_Os07g32650		[34]
LOC_Os12g43350		[34]
LOC_Os01g02450		[34]
LOC_Os01g25240		[34]
LOC_Os06g46060		[34]
LOC_Os08g32330		[34]
LOC_Os09g29490		[34]
LOC_Os01g41290		[34]
LOC_Os06g10990	S5(ORF3)	[34]
LOC_Os10g35750		[34]
LOC_Os09g02729		[34]
LOC_Os02g56480		[34]
LOC_Os07g04330		[34]
LOC_Os03g38350		[34]
LOC_Os10g03760		[34]
LOC_Os04g34910		[34]
LOC_Os03g37140		[34]
LOC_Os01g70860	Pir7a	[34]
LOC_Os01g07660		[34]
LOC_Os03g01120	OsA8	[34]
LOC_Os02g38574		[34]
LOC_Os11g08180		[34]
LOC_Os03g56390		[34]
LOC_Os08g41950	OsMADS7|OsMADS45	[34]
LOC_Os01g11130		[34]
LOC_Os10g12290		[34]
LOC_Os01g03190		[34]
LOC_Os05g24890		[34]
LOC_Os12g41260		[34]
LOC_Os08g30900		[34]
LOC_Os10g30100		[34]
LOC_Os06g43880		[34]
LOC_Os02g10100	OsSRK	[34]
LOC_Os11g15570		[34]
LOC_Os01g46260		[34]
LOC_Os04g11660		[34]
LOC_Os10g09850	OsDSR-1	[34]
LOC_Os03g13450		[34]
LOC_Os04g40440		[34]
[truncated: 1,016 more rows]

[truncated: 3 more sheets: Table S11, Table S12, Table S13]
